# Supplementary material for: Multi-Trait Improvement by Predicting Genetic Correlations in Breeding Crosses
Source: bioRxiv preprint, doi:10.1101/593210, version 2 (2019-07-22)
Supplement: TableS1 [file 593210_file07.xlsx]

## Sheet: compare_parameter_accuracy
Trait1 H2	Trait2 H2	nQTL	TP size	Base CorG	Architecture	Model	CorG	Trait1 Mean	Trait1 VarG	Trait2 Mean	Trait2 VarG
0.3	0.3	30	150	-0.5	Loose Linkage	BayesC	0.20 (0.16, 0.24)	0.68 (0.66, 0.70)	0.40 (0.37, 0.44)	0.76 (0.75, 0.78)	0.51 (0.47, 0.54)
0.3	0.3	30	150	-0.5	Loose Linkage	RRBLUP	0.22 (0.19, 0.26)	0.68 (0.66, 0.70)	0.41 (0.37, 0.44)	0.78 (0.77, 0.80)	0.51 (0.47, 0.54)
0.3	0.3	30	150	-0.5	Tight Linkage	BayesC	0.28 (0.24, 0.33)	0.66 (0.64, 0.69)	0.39 (0.35, 0.43)	0.79 (0.78, 0.81)	0.59 (0.55, 0.63)
0.3	0.3	30	150	-0.5	Tight Linkage	RRBLUP	0.26 (0.22, 0.30)	0.65 (0.63, 0.68)	0.34 (0.30, 0.37)	0.78 (0.77, 0.80)	0.56 (0.53, 0.60)
0.3	0.3	30	150	-0.5	Pleiotropy	BayesC	0.21 (0.17, 0.24)	0.67 (0.65, 0.68)	0.38 (0.34, 0.42)	0.69 (0.67, 0.71)	0.40 (0.37, 0.44)
0.3	0.3	30	150	-0.5	Pleiotropy	RRBLUP	0.22 (0.18, 0.25)	0.66 (0.64, 0.69)	0.39 (0.35, 0.43)	0.68 (0.65, 0.70)	0.37 (0.34, 0.41)
0.3	0.3	30	150	0	Loose Linkage	BayesC	0.22 (0.19, 0.25)	0.68 (0.66, 0.69)	0.39 (0.35, 0.43)	0.78 (0.76, 0.79)	0.52 (0.48, 0.55)
0.3	0.3	30	150	0	Loose Linkage	RRBLUP	0.23 (0.19, 0.27)	0.67 (0.65, 0.69)	0.38 (0.35, 0.41)	0.79 (0.78, 0.81)	0.48 (0.45, 0.52)
0.3	0.3	30	150	0	Tight Linkage	BayesC	0.27 (0.23, 0.32)	0.68 (0.65, 0.70)	0.42 (0.38, 0.45)	0.78 (0.76, 0.79)	0.57 (0.52, 0.61)
0.3	0.3	30	150	0	Tight Linkage	RRBLUP	0.30 (0.26, 0.35)	0.68 (0.66, 0.70)	0.40 (0.36, 0.44)	0.81 (0.79, 0.83)	0.61 (0.57, 0.65)
0.3	0.3	30	150	0	Pleiotropy	BayesC	0.21 (0.17, 0.25)	0.66 (0.63, 0.68)	0.39 (0.35, 0.43)	0.66 (0.64, 0.68)	0.38 (0.35, 0.41)
0.3	0.3	30	150	0	Pleiotropy	RRBLUP	0.22 (0.18, 0.25)	0.68 (0.66, 0.70)	0.39 (0.35, 0.42)	0.65 (0.62, 0.68)	0.38 (0.34, 0.42)
0.3	0.3	30	150	0.5	Loose Linkage	BayesC	0.24 (0.21, 0.28)	0.68 (0.66, 0.70)	0.42 (0.39, 0.45)	0.77 (0.76, 0.79)	0.50 (0.47, 0.54)
0.3	0.3	30	150	0.5	Loose Linkage	RRBLUP	0.22 (0.19, 0.26)	0.69 (0.66, 0.71)	0.38 (0.34, 0.42)	0.79 (0.78, 0.81)	0.53 (0.49, 0.56)
0.3	0.3	30	150	0.5	Tight Linkage	BayesC	0.31 (0.27, 0.35)	0.67 (0.64, 0.69)	0.37 (0.34, 0.41)	0.78 (0.77, 0.80)	0.58 (0.54, 0.62)
0.3	0.3	30	150	0.5	Tight Linkage	RRBLUP	0.30 (0.25, 0.34)	0.66 (0.63, 0.68)	0.37 (0.33, 0.41)	0.79 (0.77, 0.81)	0.56 (0.52, 0.61)
0.3	0.3	30	150	0.5	Pleiotropy	BayesC	0.19 (0.16, 0.23)	0.66 (0.64, 0.68)	0.42 (0.38, 0.45)	0.66 (0.64, 0.68)	0.39 (0.35, 0.43)
0.3	0.3	30	150	0.5	Pleiotropy	RRBLUP	0.22 (0.17, 0.26)	0.66 (0.63, 0.69)	0.40 (0.36, 0.43)	0.68 (0.65, 0.70)	0.41 (0.38, 0.45)
0.3	0.3	30	300	-0.5	Loose Linkage	BayesC	0.26 (0.22, 0.29)	0.71 (0.69, 0.73)	0.45 (0.41, 0.48)	0.82 (0.80, 0.83)	0.55 (0.51, 0.59)
0.3	0.3	30	300	-0.5	Loose Linkage	RRBLUP	0.28 (0.24, 0.31)	0.72 (0.70, 0.74)	0.46 (0.43, 0.50)	0.83 (0.82, 0.85)	0.60 (0.57, 0.64)
0.3	0.3	30	300	-0.5	Tight Linkage	BayesC	0.33 (0.28, 0.37)	0.71 (0.69, 0.73)	0.49 (0.46, 0.52)	0.82 (0.80, 0.83)	0.62 (0.58, 0.66)
0.3	0.3	30	300	-0.5	Tight Linkage	RRBLUP	0.35 (0.31, 0.39)	0.71 (0.69, 0.73)	0.46 (0.43, 0.50)	0.84 (0.83, 0.85)	0.65 (0.62, 0.69)
0.3	0.3	30	300	-0.5	Pleiotropy	BayesC	0.29 (0.26, 0.33)	0.72 (0.70, 0.74)	0.49 (0.45, 0.52)	0.72 (0.70, 0.74)	0.47 (0.43, 0.51)
0.3	0.3	30	300	-0.5	Pleiotropy	RRBLUP	0.28 (0.24, 0.32)	0.72 (0.70, 0.73)	0.46 (0.42, 0.49)	0.72 (0.70, 0.74)	0.44 (0.40, 0.47)
0.3	0.3	30	300	0	Loose Linkage	BayesC	0.29 (0.25, 0.32)	0.72 (0.71, 0.74)	0.46 (0.42, 0.49)	0.80 (0.78, 0.81)	0.54 (0.50, 0.58)
0.3	0.3	30	300	0	Loose Linkage	RRBLUP	0.28 (0.24, 0.32)	0.71 (0.70, 0.73)	0.43 (0.39, 0.46)	0.82 (0.80, 0.83)	0.58 (0.54, 0.61)
0.3	0.3	30	300	0	Tight Linkage	BayesC	0.37 (0.33, 0.41)	0.72 (0.70, 0.73)	0.45 (0.42, 0.48)	0.82 (0.81, 0.84)	0.62 (0.59, 0.66)
0.3	0.3	30	300	0	Tight Linkage	RRBLUP	0.33 (0.30, 0.37)	0.72 (0.70, 0.73)	0.46 (0.42, 0.49)	0.83 (0.82, 0.85)	0.66 (0.63, 0.69)
0.3	0.3	30	300	0	Pleiotropy	BayesC	0.35 (0.32, 0.39)	0.71 (0.70, 0.73)	0.49 (0.45, 0.52)	0.71 (0.70, 0.73)	0.47 (0.44, 0.51)
0.3	0.3	30	300	0	Pleiotropy	RRBLUP	0.31 (0.27, 0.34)	0.72 (0.71, 0.74)	0.46 (0.43, 0.49)	0.73 (0.71, 0.75)	0.45 (0.42, 0.48)
0.3	0.3	30	300	0.5	Loose Linkage	BayesC	0.26 (0.22, 0.30)	0.71 (0.70, 0.73)	0.45 (0.42, 0.48)	0.82 (0.80, 0.83)	0.59 (0.56, 0.62)
0.3	0.3	30	300	0.5	Loose Linkage	RRBLUP	0.28 (0.24, 0.31)	0.73 (0.71, 0.74)	0.45 (0.42, 0.48)	0.83 (0.82, 0.85)	0.57 (0.54, 0.61)
0.3	0.3	30	300	0.5	Tight Linkage	BayesC	0.38 (0.33, 0.42)	0.72 (0.70, 0.74)	0.45 (0.41, 0.48)	0.82 (0.80, 0.83)	0.64 (0.60, 0.67)
0.3	0.3	30	300	0.5	Tight Linkage	RRBLUP	0.36 (0.32, 0.40)	0.71 (0.69, 0.73)	0.44 (0.40, 0.48)	0.83 (0.81, 0.84)	0.62 (0.58, 0.66)
0.3	0.3	30	300	0.5	Pleiotropy	BayesC	0.26 (0.22, 0.30)	0.70 (0.68, 0.72)	0.44 (0.41, 0.48)	0.73 (0.71, 0.75)	0.50 (0.47, 0.54)
0.3	0.3	30	300	0.5	Pleiotropy	RRBLUP	0.29 (0.25, 0.32)	0.72 (0.70, 0.74)	0.45 (0.41, 0.48)	0.73 (0.71, 0.74)	0.49 (0.45, 0.52)
0.3	0.3	30	450	-0.5	Loose Linkage	BayesC	0.32 (0.28, 0.36)	0.75 (0.73, 0.77)	0.51 (0.48, 0.55)	0.85 (0.84, 0.86)	0.62 (0.58, 0.65)
0.3	0.3	30	450	-0.5	Loose Linkage	RRBLUP	0.34 (0.30, 0.37)	0.74 (0.73, 0.76)	0.51 (0.48, 0.54)	0.84 (0.83, 0.86)	0.59 (0.56, 0.63)
0.3	0.3	30	450	-0.5	Tight Linkage	BayesC	0.41 (0.37, 0.45)	0.74 (0.72, 0.75)	0.48 (0.45, 0.51)	0.84 (0.83, 0.85)	0.66 (0.62, 0.70)
0.3	0.3	30	450	-0.5	Tight Linkage	RRBLUP	0.42 (0.38, 0.46)	0.74 (0.73, 0.76)	0.48 (0.45, 0.51)	0.87 (0.86, 0.88)	0.67 (0.64, 0.71)
0.3	0.3	30	450	-0.5	Pleiotropy	BayesC	0.34 (0.31, 0.38)	0.74 (0.72, 0.76)	0.50 (0.47, 0.54)	0.76 (0.75, 0.77)	0.53 (0.50, 0.56)
0.3	0.3	30	450	-0.5	Pleiotropy	RRBLUP	0.31 (0.27, 0.34)	0.75 (0.73, 0.77)	0.48 (0.45, 0.51)	0.72 (0.70, 0.74)	0.47 (0.44, 0.51)
0.3	0.3	30	450	0	Loose Linkage	BayesC	0.34 (0.30, 0.37)	0.75 (0.73, 0.77)	0.53 (0.49, 0.56)	0.83 (0.82, 0.85)	0.58 (0.55, 0.61)
0.3	0.3	30	450	0	Loose Linkage	RRBLUP	0.33 (0.29, 0.37)	0.74 (0.73, 0.76)	0.49 (0.45, 0.52)	0.85 (0.83, 0.86)	0.63 (0.59, 0.66)
0.3	0.3	30	450	0	Tight Linkage	BayesC	0.42 (0.38, 0.46)	0.76 (0.74, 0.77)	0.53 (0.50, 0.56)	0.85 (0.84, 0.86)	0.66 (0.62, 0.70)
0.3	0.3	30	450	0	Tight Linkage	RRBLUP	0.42 (0.38, 0.45)	0.75 (0.74, 0.77)	0.50 (0.46, 0.53)	0.85 (0.83, 0.86)	0.66 (0.63, 0.70)
0.3	0.3	30	450	0	Pleiotropy	BayesC	0.39 (0.35, 0.42)	0.74 (0.73, 0.76)	0.52 (0.49, 0.55)	0.74 (0.72, 0.76)	0.54 (0.51, 0.57)
0.3	0.3	30	450	0	Pleiotropy	RRBLUP	0.34 (0.31, 0.37)	0.74 (0.72, 0.75)	0.50 (0.47, 0.53)	0.72 (0.70, 0.74)	0.47 (0.44, 0.50)
0.3	0.3	30	450	0.5	Loose Linkage	BayesC	0.32 (0.28, 0.36)	0.74 (0.72, 0.76)	0.54 (0.50, 0.57)	0.84 (0.82, 0.85)	0.61 (0.57, 0.64)
0.3	0.3	30	450	0.5	Loose Linkage	RRBLUP	0.32 (0.28, 0.36)	0.72 (0.70, 0.74)	0.48 (0.45, 0.52)	0.84 (0.83, 0.85)	0.61 (0.57, 0.64)
0.3	0.3	30	450	0.5	Tight Linkage	BayesC	0.40 (0.36, 0.44)	0.74 (0.73, 0.76)	0.50 (0.46, 0.53)	0.85 (0.83, 0.86)	0.64 (0.61, 0.68)
0.3	0.3	30	450	0.5	Tight Linkage	RRBLUP	0.41 (0.37, 0.44)	0.73 (0.72, 0.75)	0.47 (0.44, 0.51)	0.86 (0.84, 0.87)	0.68 (0.64, 0.71)
0.3	0.3	30	450	0.5	Pleiotropy	BayesC	0.36 (0.32, 0.39)	0.74 (0.73, 0.76)	0.53 (0.50, 0.57)	0.75 (0.73, 0.76)	0.52 (0.48, 0.55)
0.3	0.3	30	450	0.5	Pleiotropy	RRBLUP	0.33 (0.29, 0.37)	0.76 (0.74, 0.77)	0.51 (0.47, 0.54)	0.75 (0.73, 0.76)	0.50 (0.47, 0.54)
0.3	0.3	30	600	-0.5	Loose Linkage	BayesC	0.37 (0.34, 0.40)	0.77 (0.75, 0.78)	0.58 (0.55, 0.60)	0.86 (0.85, 0.87)	0.66 (0.63, 0.70)
0.3	0.3	30	600	-0.5	Loose Linkage	RRBLUP	0.35 (0.31, 0.38)	0.76 (0.75, 0.78)	0.52 (0.49, 0.56)	0.86 (0.85, 0.87)	0.64 (0.62, 0.67)
0.3	0.3	30	600	-0.5	Tight Linkage	BayesC	0.42 (0.39, 0.46)	0.76 (0.74, 0.78)	0.54 (0.51, 0.57)	0.86 (0.85, 0.87)	0.68 (0.65, 0.71)
0.3	0.3	30	600	-0.5	Tight Linkage	RRBLUP	0.41 (0.37, 0.45)	0.77 (0.75, 0.78)	0.53 (0.50, 0.56)	0.86 (0.85, 0.87)	0.67 (0.63, 0.70)
0.3	0.3	30	600	-0.5	Pleiotropy	BayesC	0.36 (0.32, 0.39)	0.76 (0.74, 0.77)	0.56 (0.53, 0.59)	0.78 (0.76, 0.79)	0.58 (0.55, 0.61)
0.3	0.3	30	600	-0.5	Pleiotropy	RRBLUP	0.37 (0.33, 0.41)	0.75 (0.73, 0.77)	0.52 (0.49, 0.54)	0.77 (0.75, 0.78)	0.53 (0.50, 0.56)
0.3	0.3	30	600	0	Loose Linkage	BayesC	0.35 (0.31, 0.38)	0.77 (0.76, 0.79)	0.57 (0.54, 0.60)	0.86 (0.85, 0.87)	0.66 (0.63, 0.69)
0.3	0.3	30	600	0	Loose Linkage	RRBLUP	0.35 (0.31, 0.39)	0.76 (0.75, 0.78)	0.54 (0.51, 0.57)	0.86 (0.85, 0.87)	0.63 (0.60, 0.66)
0.3	0.3	30	600	0	Tight Linkage	BayesC	0.45 (0.41, 0.48)	0.75 (0.73, 0.76)	0.55 (0.52, 0.59)	0.86 (0.85, 0.87)	0.71 (0.68, 0.74)
0.3	0.3	30	600	0	Tight Linkage	RRBLUP	0.44 (0.41, 0.48)	0.77 (0.75, 0.78)	0.53 (0.49, 0.56)	0.86 (0.85, 0.88)	0.67 (0.64, 0.71)
0.3	0.3	30	600	0	Pleiotropy	BayesC	0.42 (0.38, 0.45)	0.77 (0.75, 0.78)	0.58 (0.55, 0.61)	0.77 (0.75, 0.78)	0.57 (0.54, 0.60)
0.3	0.3	30	600	0	Pleiotropy	RRBLUP	0.39 (0.36, 0.43)	0.75 (0.74, 0.77)	0.51 (0.47, 0.54)	0.76 (0.74, 0.77)	0.54 (0.51, 0.57)
0.3	0.3	30	600	0.5	Loose Linkage	BayesC	0.37 (0.33, 0.41)	0.78 (0.77, 0.79)	0.58 (0.55, 0.61)	0.85 (0.84, 0.86)	0.65 (0.62, 0.68)
0.3	0.3	30	600	0.5	Loose Linkage	RRBLUP	0.36 (0.33, 0.40)	0.76 (0.75, 0.78)	0.52 (0.48, 0.55)	0.87 (0.85, 0.88)	0.62 (0.59, 0.66)
0.3	0.3	30	600	0.5	Tight Linkage	BayesC	0.41 (0.37, 0.44)	0.76 (0.75, 0.78)	0.55 (0.52, 0.58)	0.86 (0.85, 0.87)	0.71 (0.68, 0.74)
0.3	0.3	30	600	0.5	Tight Linkage	RRBLUP	0.40 (0.37, 0.44)	0.76 (0.74, 0.77)	0.49 (0.46, 0.53)	0.87 (0.86, 0.88)	0.70 (0.67, 0.74)
0.3	0.3	30	600	0.5	Pleiotropy	BayesC	0.39 (0.36, 0.43)	0.78 (0.77, 0.79)	0.56 (0.53, 0.59)	0.77 (0.76, 0.79)	0.57 (0.54, 0.60)
0.3	0.3	30	600	0.5	Pleiotropy	RRBLUP	0.35 (0.32, 0.39)	0.75 (0.73, 0.76)	0.51 (0.48, 0.54)	0.76 (0.74, 0.77)	0.53 (0.50, 0.56)
0.3	0.3	100	150	-0.5	Loose Linkage	BayesC	0.27 (0.24, 0.31)	0.66 (0.64, 0.68)	0.44 (0.41, 0.47)	0.81 (0.80, 0.83)	0.57 (0.54, 0.61)
0.3	0.3	100	150	-0.5	Loose Linkage	RRBLUP	0.28 (0.24, 0.32)	0.68 (0.66, 0.70)	0.39 (0.36, 0.42)	0.83 (0.82, 0.85)	0.62 (0.59, 0.65)
0.3	0.3	100	150	-0.5	Tight Linkage	BayesC	0.30 (0.26, 0.34)	0.66 (0.64, 0.68)	0.41 (0.38, 0.44)	0.81 (0.79, 0.83)	0.65 (0.62, 0.69)
0.3	0.3	100	150	-0.5	Tight Linkage	RRBLUP	0.29 (0.25, 0.34)	0.68 (0.65, 0.70)	0.41 (0.37, 0.44)	0.86 (0.85, 0.88)	0.67 (0.63, 0.70)
0.3	0.3	100	150	-0.5	Pleiotropy	BayesC	0.18 (0.14, 0.22)	0.67 (0.65, 0.70)	0.43 (0.39, 0.46)	0.67 (0.65, 0.69)	0.42 (0.38, 0.45)
0.3	0.3	100	150	-0.5	Pleiotropy	RRBLUP	0.20 (0.17, 0.24)	0.68 (0.65, 0.70)	0.42 (0.39, 0.45)	0.69 (0.67, 0.70)	0.44 (0.41, 0.48)
0.3	0.3	100	150	0	Loose Linkage	BayesC	0.29 (0.26, 0.33)	0.66 (0.63, 0.68)	0.39 (0.35, 0.43)	0.82 (0.81, 0.83)	0.62 (0.58, 0.65)
0.3	0.3	100	150	0	Loose Linkage	RRBLUP	0.29 (0.26, 0.33)	0.68 (0.65, 0.70)	0.43 (0.39, 0.47)	0.85 (0.84, 0.86)	0.63 (0.60, 0.66)
0.3	0.3	100	150	0	Tight Linkage	BayesC	0.34 (0.30, 0.38)	0.69 (0.67, 0.71)	0.43 (0.40, 0.47)	0.81 (0.80, 0.83)	0.65 (0.62, 0.68)
0.3	0.3	100	150	0	Tight Linkage	RRBLUP	0.33 (0.29, 0.38)	0.68 (0.65, 0.70)	0.43 (0.39, 0.46)	0.84 (0.83, 0.86)	0.67 (0.64, 0.70)
0.3	0.3	100	150	0	Pleiotropy	BayesC	0.20 (0.16, 0.24)	0.68 (0.66, 0.70)	0.41 (0.37, 0.44)	0.68 (0.66, 0.70)	0.44 (0.41, 0.47)
0.3	0.3	100	150	0	Pleiotropy	RRBLUP	0.25 (0.22, 0.29)	0.67 (0.65, 0.70)	0.41 (0.38, 0.45)	0.66 (0.64, 0.68)	0.45 (0.42, 0.48)
0.3	0.3	100	150	0.5	Loose Linkage	BayesC	0.27 (0.24, 0.31)	0.68 (0.66, 0.70)	0.44 (0.41, 0.48)	0.82 (0.80, 0.83)	0.59 (0.56, 0.63)
0.3	0.3	100	150	0.5	Loose Linkage	RRBLUP	0.30 (0.27, 0.34)	0.69 (0.67, 0.71)	0.41 (0.37, 0.45)	0.85 (0.84, 0.86)	0.61 (0.57, 0.64)
0.3	0.3	100	150	0.5	Tight Linkage	BayesC	0.29 (0.25, 0.33)	0.68 (0.65, 0.70)	0.43 (0.40, 0.46)	0.82 (0.81, 0.84)	0.66 (0.63, 0.69)
0.3	0.3	100	150	0.5	Tight Linkage	RRBLUP	0.31 (0.27, 0.35)	0.66 (0.64, 0.68)	0.43 (0.39, 0.46)	0.84 (0.83, 0.86)	0.67 (0.64, 0.71)
0.3	0.3	100	150	0.5	Pleiotropy	BayesC	0.19 (0.15, 0.22)	0.68 (0.66, 0.69)	0.46 (0.43, 0.50)	0.67 (0.65, 0.69)	0.44 (0.40, 0.47)
0.3	0.3	100	150	0.5	Pleiotropy	RRBLUP	0.23 (0.19, 0.27)	0.69 (0.67, 0.71)	0.47 (0.43, 0.50)	0.68 (0.66, 0.70)	0.44 (0.40, 0.48)
0.3	0.3	100	300	-0.5	Loose Linkage	BayesC	0.32 (0.29, 0.36)	0.72 (0.71, 0.74)	0.48 (0.45, 0.52)	0.86 (0.85, 0.87)	0.63 (0.60, 0.66)
0.3	0.3	100	300	-0.5	Loose Linkage	RRBLUP	0.30 (0.27, 0.34)	0.71 (0.69, 0.72)	0.47 (0.43, 0.50)	0.88 (0.87, 0.89)	0.66 (0.62, 0.69)
0.3	0.3	100	300	-0.5	Tight Linkage	BayesC	0.37 (0.33, 0.40)	0.70 (0.68, 0.72)	0.48 (0.44, 0.51)	0.87 (0.86, 0.88)	0.71 (0.68, 0.74)
0.3	0.3	100	300	-0.5	Tight Linkage	RRBLUP	0.39 (0.36, 0.43)	0.72 (0.70, 0.74)	0.45 (0.42, 0.49)	0.88 (0.87, 0.89)	0.73 (0.71, 0.76)
0.3	0.3	100	300	-0.5	Pleiotropy	BayesC	0.23 (0.19, 0.27)	0.70 (0.68, 0.71)	0.50 (0.46, 0.53)	0.73 (0.71, 0.75)	0.48 (0.44, 0.51)
0.3	0.3	100	300	-0.5	Pleiotropy	RRBLUP	0.25 (0.21, 0.29)	0.71 (0.69, 0.73)	0.46 (0.43, 0.49)	0.73 (0.71, 0.75)	0.48 (0.45, 0.51)
0.3	0.3	100	300	0	Loose Linkage	BayesC	0.30 (0.26, 0.33)	0.72 (0.70, 0.73)	0.49 (0.46, 0.53)	0.86 (0.84, 0.87)	0.64 (0.61, 0.67)
0.3	0.3	100	300	0	Loose Linkage	RRBLUP	0.35 (0.31, 0.39)	0.72 (0.70, 0.74)	0.44 (0.41, 0.47)	0.87 (0.86, 0.89)	0.66 (0.63, 0.70)
0.3	0.3	100	300	0	Tight Linkage	BayesC	0.38 (0.34, 0.42)	0.72 (0.70, 0.74)	0.43 (0.40, 0.47)	0.87 (0.86, 0.88)	0.73 (0.70, 0.75)
0.3	0.3	100	300	0	Tight Linkage	RRBLUP	0.41 (0.37, 0.44)	0.71 (0.69, 0.73)	0.46 (0.43, 0.50)	0.89 (0.88, 0.90)	0.75 (0.73, 0.78)
0.3	0.3	100	300	0	Pleiotropy	BayesC	0.25 (0.22, 0.29)	0.71 (0.69, 0.73)	0.47 (0.44, 0.50)	0.72 (0.70, 0.74)	0.45 (0.42, 0.49)
0.3	0.3	100	300	0	Pleiotropy	RRBLUP	0.28 (0.24, 0.32)	0.72 (0.71, 0.74)	0.44 (0.41, 0.47)	0.72 (0.71, 0.74)	0.48 (0.44, 0.51)
0.3	0.3	100	300	0.5	Loose Linkage	BayesC	0.32 (0.29, 0.35)	0.71 (0.69, 0.73)	0.51 (0.48, 0.53)	0.86 (0.85, 0.87)	0.67 (0.65, 0.70)
0.3	0.3	100	300	0.5	Loose Linkage	RRBLUP	0.34 (0.31, 0.37)	0.72 (0.70, 0.74)	0.45 (0.42, 0.48)	0.86 (0.84, 0.87)	0.66 (0.63, 0.70)
0.3	0.3	100	300	0.5	Tight Linkage	BayesC	0.36 (0.32, 0.39)	0.72 (0.70, 0.73)	0.47 (0.44, 0.51)	0.86 (0.85, 0.88)	0.72 (0.69, 0.75)
0.3	0.3	100	300	0.5	Tight Linkage	RRBLUP	0.39 (0.35, 0.43)	0.71 (0.69, 0.72)	0.48 (0.44, 0.51)	0.88 (0.87, 0.89)	0.72 (0.69, 0.76)
0.3	0.3	100	300	0.5	Pleiotropy	BayesC	0.28 (0.25, 0.32)	0.71 (0.69, 0.73)	0.44 (0.41, 0.48)	0.71 (0.70, 0.73)	0.49 (0.46, 0.53)
0.3	0.3	100	300	0.5	Pleiotropy	RRBLUP	0.24 (0.21, 0.28)	0.71 (0.68, 0.73)	0.45 (0.42, 0.49)	0.72 (0.70, 0.74)	0.46 (0.42, 0.49)
0.3	0.3	100	450	-0.5	Loose Linkage	BayesC	0.38 (0.35, 0.42)	0.74 (0.73, 0.76)	0.51 (0.48, 0.55)	0.89 (0.88, 0.90)	0.71 (0.68, 0.73)
0.3	0.3	100	450	-0.5	Loose Linkage	RRBLUP	0.38 (0.35, 0.41)	0.74 (0.73, 0.76)	0.50 (0.47, 0.53)	0.89 (0.89, 0.90)	0.70 (0.67, 0.72)
0.3	0.3	100	450	-0.5	Tight Linkage	BayesC	0.44 (0.41, 0.47)	0.73 (0.71, 0.75)	0.52 (0.49, 0.55)	0.89 (0.88, 0.90)	0.73 (0.70, 0.76)
0.3	0.3	100	450	-0.5	Tight Linkage	RRBLUP	0.44 (0.40, 0.47)	0.74 (0.72, 0.75)	0.48 (0.45, 0.51)	0.90 (0.89, 0.91)	0.74 (0.71, 0.77)
0.3	0.3	100	450	-0.5	Pleiotropy	BayesC	0.30 (0.26, 0.33)	0.73 (0.71, 0.75)	0.53 (0.50, 0.56)	0.74 (0.72, 0.75)	0.49 (0.46, 0.52)
0.3	0.3	100	450	-0.5	Pleiotropy	RRBLUP	0.31 (0.28, 0.34)	0.75 (0.74, 0.77)	0.54 (0.51, 0.57)	0.74 (0.73, 0.76)	0.49 (0.46, 0.52)
0.3	0.3	100	450	0	Loose Linkage	BayesC	0.36 (0.33, 0.39)	0.73 (0.71, 0.75)	0.52 (0.50, 0.55)	0.88 (0.87, 0.89)	0.68 (0.65, 0.71)
0.3	0.3	100	450	0	Loose Linkage	RRBLUP	0.40 (0.36, 0.43)	0.75 (0.74, 0.76)	0.52 (0.49, 0.54)	0.89 (0.88, 0.90)	0.69 (0.66, 0.72)
0.3	0.3	100	450	0	Tight Linkage	BayesC	0.44 (0.40, 0.47)	0.73 (0.71, 0.74)	0.49 (0.46, 0.51)	0.89 (0.88, 0.90)	0.73 (0.70, 0.76)
0.3	0.3	100	450	0	Tight Linkage	RRBLUP	0.45 (0.42, 0.49)	0.74 (0.72, 0.75)	0.47 (0.44, 0.50)	0.89 (0.88, 0.90)	0.75 (0.72, 0.78)
0.3	0.3	100	450	0	Pleiotropy	BayesC	0.34 (0.31, 0.38)	0.74 (0.73, 0.75)	0.52 (0.49, 0.55)	0.75 (0.73, 0.76)	0.55 (0.52, 0.58)
0.3	0.3	100	450	0	Pleiotropy	RRBLUP	0.35 (0.31, 0.38)	0.75 (0.73, 0.77)	0.53 (0.50, 0.56)	0.74 (0.73, 0.76)	0.53 (0.50, 0.56)
0.3	0.3	100	450	0.5	Loose Linkage	BayesC	0.34 (0.30, 0.38)	0.74 (0.72, 0.75)	0.53 (0.50, 0.55)	0.88 (0.86, 0.89)	0.68 (0.65, 0.71)
0.3	0.3	100	450	0.5	Loose Linkage	RRBLUP	0.35 (0.31, 0.38)	0.75 (0.73, 0.76)	0.53 (0.50, 0.56)	0.89 (0.89, 0.90)	0.71 (0.68, 0.73)
0.3	0.3	100	450	0.5	Tight Linkage	BayesC	0.41 (0.37, 0.45)	0.72 (0.71, 0.74)	0.51 (0.48, 0.54)	0.88 (0.87, 0.89)	0.74 (0.71, 0.76)
0.3	0.3	100	450	0.5	Tight Linkage	RRBLUP	0.46 (0.43, 0.50)	0.75 (0.73, 0.76)	0.49 (0.46, 0.52)	0.90 (0.89, 0.91)	0.78 (0.75, 0.80)
0.3	0.3	100	450	0.5	Pleiotropy	BayesC	0.31 (0.27, 0.35)	0.74 (0.73, 0.76)	0.50 (0.47, 0.53)	0.72 (0.70, 0.74)	0.52 (0.49, 0.55)
0.3	0.3	100	450	0.5	Pleiotropy	RRBLUP	0.31 (0.27, 0.34)	0.75 (0.73, 0.76)	0.51 (0.47, 0.54)	0.75 (0.73, 0.77)	0.51 (0.48, 0.55)
0.3	0.3	100	600	-0.5	Loose Linkage	BayesC	0.36 (0.33, 0.39)	0.76 (0.74, 0.78)	0.57 (0.54, 0.60)	0.89 (0.89, 0.90)	0.72 (0.69, 0.74)
0.3	0.3	100	600	-0.5	Loose Linkage	RRBLUP	0.40 (0.37, 0.44)	0.76 (0.74, 0.78)	0.56 (0.53, 0.59)	0.90 (0.90, 0.91)	0.70 (0.67, 0.72)
0.3	0.3	100	600	-0.5	Tight Linkage	BayesC	0.46 (0.43, 0.49)	0.75 (0.74, 0.77)	0.52 (0.49, 0.56)	0.90 (0.89, 0.91)	0.76 (0.73, 0.79)
0.3	0.3	100	600	-0.5	Tight Linkage	RRBLUP	0.48 (0.44, 0.51)	0.76 (0.74, 0.77)	0.55 (0.52, 0.58)	0.91 (0.90, 0.92)	0.78 (0.76, 0.81)
0.3	0.3	100	600	-0.5	Pleiotropy	BayesC	0.38 (0.34, 0.41)	0.76 (0.74, 0.77)	0.53 (0.50, 0.56)	0.77 (0.76, 0.79)	0.55 (0.52, 0.58)
0.3	0.3	100	600	-0.5	Pleiotropy	RRBLUP	0.32 (0.29, 0.36)	0.76 (0.74, 0.78)	0.53 (0.49, 0.56)	0.76 (0.75, 0.78)	0.53 (0.50, 0.56)
0.3	0.3	100	600	0	Loose Linkage	BayesC	0.41 (0.38, 0.45)	0.77 (0.75, 0.78)	0.58 (0.55, 0.60)	0.89 (0.89, 0.90)	0.69 (0.66, 0.71)
0.3	0.3	100	600	0	Loose Linkage	RRBLUP	0.41 (0.38, 0.45)	0.77 (0.75, 0.78)	0.53 (0.50, 0.56)	0.90 (0.89, 0.91)	0.72 (0.69, 0.74)
0.3	0.3	100	600	0	Tight Linkage	BayesC	0.48 (0.45, 0.52)	0.75 (0.74, 0.77)	0.56 (0.53, 0.59)	0.90 (0.90, 0.91)	0.76 (0.73, 0.78)
0.3	0.3	100	600	0	Tight Linkage	RRBLUP	0.47 (0.43, 0.50)	0.77 (0.75, 0.78)	0.54 (0.51, 0.57)	0.91 (0.90, 0.92)	0.79 (0.76, 0.81)
0.3	0.3	100	600	0	Pleiotropy	BayesC	0.36 (0.33, 0.39)	0.75 (0.73, 0.76)	0.54 (0.51, 0.57)	0.75 (0.74, 0.77)	0.53 (0.50, 0.56)
0.3	0.3	100	600	0	Pleiotropy	RRBLUP	0.39 (0.36, 0.42)	0.77 (0.75, 0.78)	0.51 (0.48, 0.54)	0.77 (0.75, 0.78)	0.54 (0.51, 0.57)
0.3	0.3	100	600	0.5	Loose Linkage	BayesC	0.41 (0.38, 0.44)	0.75 (0.74, 0.77)	0.55 (0.53, 0.58)	0.90 (0.89, 0.90)	0.70 (0.67, 0.73)
0.3	0.3	100	600	0.5	Loose Linkage	RRBLUP	0.42 (0.39, 0.46)	0.77 (0.75, 0.78)	0.54 (0.51, 0.57)	0.91 (0.90, 0.92)	0.72 (0.69, 0.74)
0.3	0.3	100	600	0.5	Tight Linkage	BayesC	0.44 (0.41, 0.48)	0.78 (0.76, 0.79)	0.53 (0.51, 0.56)	0.91 (0.90, 0.92)	0.79 (0.76, 0.81)
0.3	0.3	100	600	0.5	Tight Linkage	RRBLUP	0.47 (0.43, 0.50)	0.75 (0.74, 0.77)	0.52 (0.50, 0.55)	0.91 (0.91, 0.92)	0.79 (0.77, 0.82)
0.3	0.3	100	600	0.5	Pleiotropy	BayesC	0.37 (0.34, 0.40)	0.77 (0.75, 0.78)	0.54 (0.51, 0.57)	0.76 (0.74, 0.77)	0.53 (0.50, 0.56)
0.3	0.3	100	600	0.5	Pleiotropy	RRBLUP	0.35 (0.32, 0.39)	0.76 (0.75, 0.78)	0.54 (0.51, 0.57)	0.76 (0.74, 0.78)	0.53 (0.50, 0.56)
0.3	0.6	30	150	-0.5	Loose Linkage	BayesC	0.26 (0.22, 0.30)	0.67 (0.65, 0.69)	0.36 (0.33, 0.40)	0.88 (0.87, 0.89)	0.64 (0.61, 0.68)
0.3	0.6	30	150	-0.5	Loose Linkage	RRBLUP	0.26 (0.21, 0.30)	0.66 (0.64, 0.69)	0.37 (0.34, 0.41)	0.89 (0.88, 0.90)	0.62 (0.59, 0.66)
0.3	0.6	30	150	-0.5	Tight Linkage	BayesC	0.31 (0.27, 0.34)	0.64 (0.62, 0.66)	0.37 (0.33, 0.40)	0.88 (0.87, 0.89)	0.67 (0.64, 0.71)
0.3	0.6	30	150	-0.5	Tight Linkage	RRBLUP	0.33 (0.29, 0.37)	0.66 (0.64, 0.68)	0.38 (0.34, 0.42)	0.89 (0.88, 0.90)	0.69 (0.65, 0.72)
0.3	0.6	30	150	-0.5	Pleiotropy	BayesC	0.27 (0.23, 0.31)	0.66 (0.64, 0.68)	0.39 (0.35, 0.43)	0.83 (0.82, 0.84)	0.50 (0.46, 0.53)
0.3	0.6	30	150	-0.5	Pleiotropy	RRBLUP	0.24 (0.20, 0.28)	0.65 (0.63, 0.68)	0.37 (0.33, 0.40)	0.83 (0.82, 0.84)	0.50 (0.47, 0.53)
0.3	0.6	30	150	0	Loose Linkage	BayesC	0.26 (0.22, 0.30)	0.68 (0.66, 0.70)	0.41 (0.37, 0.44)	0.88 (0.87, 0.88)	0.63 (0.60, 0.66)
0.3	0.6	30	150	0	Loose Linkage	RRBLUP	0.24 (0.21, 0.28)	0.66 (0.64, 0.68)	0.37 (0.33, 0.40)	0.87 (0.86, 0.88)	0.60 (0.56, 0.63)
0.3	0.6	30	150	0	Tight Linkage	BayesC	0.31 (0.27, 0.35)	0.68 (0.65, 0.70)	0.42 (0.39, 0.45)	0.88 (0.87, 0.89)	0.66 (0.63, 0.70)
0.3	0.6	30	150	0	Tight Linkage	RRBLUP	0.32 (0.28, 0.36)	0.67 (0.65, 0.69)	0.40 (0.36, 0.43)	0.88 (0.88, 0.89)	0.69 (0.66, 0.72)
0.3	0.6	30	150	0	Pleiotropy	BayesC	0.28 (0.24, 0.32)	0.68 (0.66, 0.70)	0.38 (0.35, 0.42)	0.84 (0.82, 0.85)	0.50 (0.47, 0.54)
0.3	0.6	30	150	0	Pleiotropy	RRBLUP	0.29 (0.25, 0.33)	0.67 (0.65, 0.69)	0.37 (0.33, 0.41)	0.83 (0.82, 0.84)	0.51 (0.48, 0.54)
0.3	0.6	30	150	0.5	Loose Linkage	BayesC	0.27 (0.24, 0.31)	0.67 (0.65, 0.69)	0.36 (0.32, 0.40)	0.88 (0.88, 0.89)	0.62 (0.58, 0.65)
0.3	0.6	30	150	0.5	Loose Linkage	RRBLUP	0.24 (0.20, 0.27)	0.65 (0.63, 0.68)	0.39 (0.35, 0.43)	0.87 (0.86, 0.88)	0.59 (0.56, 0.63)
0.3	0.6	30	150	0.5	Tight Linkage	BayesC	0.33 (0.29, 0.37)	0.64 (0.62, 0.66)	0.39 (0.35, 0.42)	0.88 (0.87, 0.89)	0.67 (0.64, 0.71)
0.3	0.6	30	150	0.5	Tight Linkage	RRBLUP	0.28 (0.24, 0.33)	0.67 (0.64, 0.69)	0.39 (0.35, 0.42)	0.88 (0.87, 0.89)	0.68 (0.64, 0.72)
0.3	0.6	30	150	0.5	Pleiotropy	BayesC	0.25 (0.22, 0.29)	0.69 (0.66, 0.71)	0.40 (0.37, 0.43)	0.83 (0.82, 0.84)	0.52 (0.49, 0.55)
0.3	0.6	30	150	0.5	Pleiotropy	RRBLUP	0.28 (0.25, 0.32)	0.65 (0.62, 0.67)	0.38 (0.34, 0.42)	0.81 (0.80, 0.83)	0.48 (0.45, 0.51)
0.3	0.6	30	300	-0.5	Loose Linkage	BayesC	0.33 (0.29, 0.37)	0.72 (0.70, 0.74)	0.43 (0.40, 0.46)	0.90 (0.89, 0.90)	0.70 (0.68, 0.73)
0.3	0.6	30	300	-0.5	Loose Linkage	RRBLUP	0.30 (0.27, 0.34)	0.74 (0.72, 0.75)	0.46 (0.42, 0.49)	0.90 (0.89, 0.91)	0.69 (0.66, 0.72)
0.3	0.6	30	300	-0.5	Tight Linkage	BayesC	0.43 (0.39, 0.47)	0.73 (0.71, 0.74)	0.47 (0.44, 0.51)	0.90 (0.90, 0.91)	0.77 (0.74, 0.79)
0.3	0.6	30	300	-0.5	Tight Linkage	RRBLUP	0.39 (0.35, 0.42)	0.72 (0.70, 0.74)	0.44 (0.41, 0.48)	0.91 (0.90, 0.92)	0.73 (0.70, 0.75)
0.3	0.6	30	300	-0.5	Pleiotropy	BayesC	0.34 (0.30, 0.37)	0.73 (0.71, 0.75)	0.49 (0.45, 0.52)	0.85 (0.84, 0.86)	0.63 (0.60, 0.66)
0.3	0.6	30	300	-0.5	Pleiotropy	RRBLUP	0.32 (0.29, 0.35)	0.71 (0.69, 0.73)	0.42 (0.39, 0.46)	0.85 (0.83, 0.86)	0.58 (0.54, 0.61)
0.3	0.6	30	300	0	Loose Linkage	BayesC	0.32 (0.28, 0.35)	0.71 (0.70, 0.73)	0.47 (0.44, 0.51)	0.90 (0.89, 0.90)	0.69 (0.66, 0.71)
0.3	0.6	30	300	0	Loose Linkage	RRBLUP	0.32 (0.28, 0.36)	0.74 (0.72, 0.76)	0.44 (0.40, 0.47)	0.89 (0.89, 0.90)	0.67 (0.64, 0.70)
0.3	0.6	30	300	0	Tight Linkage	BayesC	0.40 (0.36, 0.44)	0.72 (0.70, 0.74)	0.44 (0.40, 0.48)	0.90 (0.89, 0.90)	0.73 (0.70, 0.76)
0.3	0.6	30	300	0	Tight Linkage	RRBLUP	0.41 (0.37, 0.44)	0.70 (0.68, 0.73)	0.43 (0.39, 0.47)	0.91 (0.90, 0.91)	0.74 (0.72, 0.77)
0.3	0.6	30	300	0	Pleiotropy	BayesC	0.35 (0.32, 0.38)	0.71 (0.69, 0.73)	0.44 (0.40, 0.47)	0.85 (0.84, 0.86)	0.57 (0.54, 0.60)
0.3	0.6	30	300	0	Pleiotropy	RRBLUP	0.40 (0.37, 0.43)	0.73 (0.71, 0.75)	0.50 (0.46, 0.54)	0.85 (0.84, 0.86)	0.57 (0.53, 0.60)
0.3	0.6	30	300	0.5	Loose Linkage	BayesC	0.36 (0.33, 0.39)	0.72 (0.70, 0.74)	0.48 (0.45, 0.51)	0.90 (0.89, 0.91)	0.70 (0.68, 0.73)
0.3	0.6	30	300	0.5	Loose Linkage	RRBLUP	0.33 (0.30, 0.37)	0.71 (0.69, 0.73)	0.45 (0.41, 0.48)	0.90 (0.89, 0.90)	0.67 (0.64, 0.70)
0.3	0.6	30	300	0.5	Tight Linkage	BayesC	0.43 (0.38, 0.47)	0.71 (0.70, 0.73)	0.47 (0.44, 0.50)	0.91 (0.90, 0.91)	0.75 (0.72, 0.77)
0.3	0.6	30	300	0.5	Tight Linkage	RRBLUP	0.38 (0.34, 0.42)	0.72 (0.70, 0.73)	0.47 (0.43, 0.50)	0.91 (0.90, 0.92)	0.71 (0.68, 0.75)
0.3	0.6	30	300	0.5	Pleiotropy	BayesC	0.30 (0.26, 0.34)	0.69 (0.67, 0.71)	0.45 (0.42, 0.49)	0.84 (0.83, 0.85)	0.58 (0.55, 0.62)
0.3	0.6	30	300	0.5	Pleiotropy	RRBLUP	0.33 (0.30, 0.36)	0.72 (0.71, 0.74)	0.47 (0.43, 0.51)	0.83 (0.82, 0.85)	0.55 (0.52, 0.59)
0.3	0.6	30	450	-0.5	Loose Linkage	BayesC	0.34 (0.30, 0.38)	0.76 (0.74, 0.77)	0.53 (0.50, 0.56)	0.90 (0.90, 0.91)	0.74 (0.71, 0.77)
0.3	0.6	30	450	-0.5	Loose Linkage	RRBLUP	0.39 (0.35, 0.42)	0.73 (0.72, 0.75)	0.51 (0.48, 0.54)	0.91 (0.90, 0.91)	0.71 (0.69, 0.74)
0.3	0.6	30	450	-0.5	Tight Linkage	BayesC	0.47 (0.43, 0.50)	0.74 (0.73, 0.76)	0.52 (0.49, 0.55)	0.92 (0.92, 0.93)	0.77 (0.74, 0.80)
0.3	0.6	30	450	-0.5	Tight Linkage	RRBLUP	0.43 (0.40, 0.47)	0.74 (0.72, 0.76)	0.47 (0.44, 0.50)	0.92 (0.91, 0.93)	0.76 (0.73, 0.79)
0.3	0.6	30	450	-0.5	Pleiotropy	BayesC	0.42 (0.39, 0.46)	0.74 (0.72, 0.76)	0.55 (0.51, 0.58)	0.86 (0.85, 0.87)	0.67 (0.64, 0.70)
0.3	0.6	30	450	-0.5	Pleiotropy	RRBLUP	0.37 (0.34, 0.41)	0.74 (0.73, 0.76)	0.48 (0.44, 0.51)	0.87 (0.86, 0.88)	0.61 (0.58, 0.64)
0.3	0.6	30	450	0	Loose Linkage	BayesC	0.36 (0.32, 0.40)	0.76 (0.74, 0.77)	0.53 (0.50, 0.56)	0.91 (0.91, 0.92)	0.75 (0.72, 0.77)
0.3	0.6	30	450	0	Loose Linkage	RRBLUP	0.38 (0.34, 0.41)	0.75 (0.73, 0.77)	0.52 (0.48, 0.55)	0.91 (0.90, 0.91)	0.70 (0.68, 0.73)
0.3	0.6	30	450	0	Tight Linkage	BayesC	0.53 (0.50, 0.56)	0.75 (0.73, 0.76)	0.53 (0.50, 0.56)	0.92 (0.91, 0.93)	0.79 (0.77, 0.82)
0.3	0.6	30	450	0	Tight Linkage	RRBLUP	0.46 (0.42, 0.49)	0.74 (0.72, 0.76)	0.48 (0.45, 0.51)	0.91 (0.91, 0.92)	0.73 (0.71, 0.76)
0.3	0.6	30	450	0	Pleiotropy	BayesC	0.44 (0.41, 0.48)	0.73 (0.72, 0.75)	0.50 (0.46, 0.53)	0.85 (0.85, 0.86)	0.64 (0.61, 0.67)
0.3	0.6	30	450	0	Pleiotropy	RRBLUP	0.44 (0.40, 0.47)	0.75 (0.73, 0.77)	0.49 (0.45, 0.52)	0.86 (0.85, 0.87)	0.60 (0.57, 0.63)
0.3	0.6	30	450	0.5	Loose Linkage	BayesC	0.39 (0.35, 0.43)	0.74 (0.73, 0.76)	0.50 (0.46, 0.53)	0.91 (0.90, 0.92)	0.74 (0.71, 0.76)
0.3	0.6	30	450	0.5	Loose Linkage	RRBLUP	0.38 (0.34, 0.41)	0.74 (0.73, 0.76)	0.53 (0.50, 0.57)	0.90 (0.90, 0.91)	0.69 (0.66, 0.72)
0.3	0.6	30	450	0.5	Tight Linkage	BayesC	0.44 (0.40, 0.47)	0.74 (0.72, 0.76)	0.51 (0.48, 0.54)	0.91 (0.91, 0.92)	0.77 (0.75, 0.80)
0.3	0.6	30	450	0.5	Tight Linkage	RRBLUP	0.50 (0.46, 0.53)	0.75 (0.74, 0.77)	0.52 (0.49, 0.55)	0.92 (0.91, 0.92)	0.77 (0.74, 0.80)
0.3	0.6	30	450	0.5	Pleiotropy	BayesC	0.41 (0.38, 0.45)	0.75 (0.74, 0.76)	0.53 (0.50, 0.57)	0.86 (0.86, 0.87)	0.66 (0.62, 0.69)
0.3	0.6	30	450	0.5	Pleiotropy	RRBLUP	0.37 (0.34, 0.41)	0.75 (0.74, 0.76)	0.48 (0.44, 0.52)	0.86 (0.85, 0.87)	0.60 (0.57, 0.63)
0.3	0.6	30	600	-0.5	Loose Linkage	BayesC	0.43 (0.40, 0.47)	0.77 (0.75, 0.78)	0.55 (0.52, 0.58)	0.91 (0.90, 0.92)	0.78 (0.75, 0.80)
0.3	0.6	30	600	-0.5	Loose Linkage	RRBLUP	0.39 (0.35, 0.42)	0.76 (0.74, 0.78)	0.53 (0.50, 0.56)	0.91 (0.91, 0.92)	0.69 (0.67, 0.72)
0.3	0.6	30	600	-0.5	Tight Linkage	BayesC	0.54 (0.51, 0.58)	0.76 (0.74, 0.78)	0.57 (0.54, 0.60)	0.92 (0.92, 0.93)	0.81 (0.79, 0.83)
0.3	0.6	30	600	-0.5	Tight Linkage	RRBLUP	0.47 (0.44, 0.50)	0.76 (0.74, 0.77)	0.51 (0.48, 0.54)	0.92 (0.91, 0.92)	0.76 (0.74, 0.79)
0.3	0.6	30	600	-0.5	Pleiotropy	BayesC	0.48 (0.45, 0.51)	0.75 (0.74, 0.77)	0.57 (0.54, 0.60)	0.85 (0.83, 0.86)	0.74 (0.72, 0.77)
0.3	0.6	30	600	-0.5	Pleiotropy	RRBLUP	0.45 (0.42, 0.48)	0.76 (0.74, 0.77)	0.53 (0.49, 0.56)	0.87 (0.86, 0.88)	0.65 (0.63, 0.68)
0.3	0.6	30	600	0	Loose Linkage	BayesC	0.44 (0.40, 0.47)	0.76 (0.74, 0.77)	0.56 (0.53, 0.58)	0.91 (0.91, 0.92)	0.77 (0.75, 0.79)
0.3	0.6	30	600	0	Loose Linkage	RRBLUP	0.42 (0.38, 0.45)	0.76 (0.75, 0.78)	0.52 (0.49, 0.55)	0.91 (0.91, 0.92)	0.71 (0.68, 0.73)
0.3	0.6	30	600	0	Tight Linkage	BayesC	0.53 (0.49, 0.56)	0.75 (0.73, 0.77)	0.55 (0.52, 0.58)	0.92 (0.91, 0.92)	0.81 (0.79, 0.83)
0.3	0.6	30	600	0	Tight Linkage	RRBLUP	0.50 (0.47, 0.53)	0.78 (0.77, 0.80)	0.53 (0.50, 0.56)	0.93 (0.92, 0.93)	0.81 (0.79, 0.83)
0.3	0.6	30	600	0	Pleiotropy	BayesC	0.47 (0.43, 0.50)	0.76 (0.75, 0.78)	0.56 (0.53, 0.59)	0.85 (0.85, 0.86)	0.72 (0.70, 0.74)
0.3	0.6	30	600	0	Pleiotropy	RRBLUP	0.46 (0.43, 0.49)	0.76 (0.75, 0.78)	0.49 (0.46, 0.53)	0.87 (0.87, 0.88)	0.64 (0.61, 0.66)
0.3	0.6	30	600	0.5	Loose Linkage	BayesC	0.42 (0.39, 0.46)	0.77 (0.75, 0.78)	0.59 (0.56, 0.62)	0.92 (0.91, 0.93)	0.79 (0.77, 0.81)
0.3	0.6	30	600	0.5	Loose Linkage	RRBLUP	0.37 (0.33, 0.40)	0.76 (0.75, 0.78)	0.52 (0.49, 0.55)	0.92 (0.91, 0.93)	0.72 (0.69, 0.75)
0.3	0.6	30	600	0.5	Tight Linkage	BayesC	0.52 (0.49, 0.56)	0.78 (0.76, 0.79)	0.54 (0.51, 0.58)	0.92 (0.92, 0.93)	0.83 (0.81, 0.85)
0.3	0.6	30	600	0.5	Tight Linkage	RRBLUP	0.49 (0.46, 0.52)	0.76 (0.74, 0.77)	0.50 (0.47, 0.54)	0.92 (0.91, 0.93)	0.75 (0.72, 0.78)
0.3	0.6	30	600	0.5	Pleiotropy	BayesC	0.45 (0.41, 0.48)	0.76 (0.75, 0.78)	0.54 (0.51, 0.58)	0.87 (0.86, 0.88)	0.72 (0.69, 0.74)
0.3	0.6	30	600	0.5	Pleiotropy	RRBLUP	0.43 (0.39, 0.46)	0.77 (0.76, 0.79)	0.52 (0.48, 0.55)	0.88 (0.87, 0.88)	0.64 (0.62, 0.67)
0.3	0.6	100	150	-0.5	Loose Linkage	BayesC	0.34 (0.30, 0.37)	0.67 (0.65, 0.69)	0.42 (0.38, 0.45)	0.90 (0.89, 0.91)	0.72 (0.70, 0.74)
0.3	0.6	100	150	-0.5	Loose Linkage	RRBLUP	0.31 (0.27, 0.35)	0.69 (0.67, 0.70)	0.42 (0.38, 0.46)	0.91 (0.90, 0.92)	0.72 (0.69, 0.74)
0.3	0.6	100	150	-0.5	Tight Linkage	BayesC	0.37 (0.34, 0.41)	0.69 (0.67, 0.71)	0.42 (0.39, 0.45)	0.91 (0.91, 0.92)	0.77 (0.75, 0.80)
0.3	0.6	100	150	-0.5	Tight Linkage	RRBLUP	0.37 (0.33, 0.41)	0.66 (0.64, 0.68)	0.42 (0.38, 0.46)	0.91 (0.90, 0.92)	0.76 (0.73, 0.79)
0.3	0.6	100	150	-0.5	Pleiotropy	BayesC	0.24 (0.20, 0.27)	0.66 (0.64, 0.68)	0.45 (0.42, 0.48)	0.81 (0.80, 0.83)	0.51 (0.47, 0.54)
0.3	0.6	100	150	-0.5	Pleiotropy	RRBLUP	0.22 (0.19, 0.26)	0.66 (0.64, 0.68)	0.43 (0.40, 0.46)	0.82 (0.81, 0.83)	0.50 (0.48, 0.53)
0.3	0.6	100	150	0	Loose Linkage	BayesC	0.32 (0.28, 0.35)	0.66 (0.64, 0.68)	0.41 (0.37, 0.44)	0.91 (0.90, 0.91)	0.70 (0.67, 0.73)
0.3	0.6	100	150	0	Loose Linkage	RRBLUP	0.30 (0.26, 0.33)	0.68 (0.66, 0.70)	0.40 (0.36, 0.43)	0.90 (0.89, 0.91)	0.69 (0.66, 0.71)
0.3	0.6	100	150	0	Tight Linkage	BayesC	0.35 (0.31, 0.39)	0.68 (0.66, 0.70)	0.42 (0.39, 0.45)	0.91 (0.90, 0.91)	0.75 (0.73, 0.78)
0.3	0.6	100	150	0	Tight Linkage	RRBLUP	0.39 (0.35, 0.43)	0.67 (0.65, 0.68)	0.42 (0.39, 0.46)	0.91 (0.91, 0.92)	0.77 (0.74, 0.79)
0.3	0.6	100	150	0	Pleiotropy	BayesC	0.27 (0.24, 0.31)	0.67 (0.65, 0.69)	0.44 (0.41, 0.48)	0.83 (0.82, 0.84)	0.51 (0.48, 0.54)
0.3	0.6	100	150	0	Pleiotropy	RRBLUP	0.29 (0.26, 0.32)	0.68 (0.66, 0.70)	0.41 (0.38, 0.44)	0.82 (0.81, 0.83)	0.49 (0.46, 0.53)
0.3	0.6	100	150	0.5	Loose Linkage	BayesC	0.32 (0.28, 0.36)	0.68 (0.66, 0.70)	0.42 (0.39, 0.45)	0.92 (0.91, 0.92)	0.74 (0.71, 0.77)
0.3	0.6	100	150	0.5	Loose Linkage	RRBLUP	0.34 (0.30, 0.37)	0.67 (0.65, 0.70)	0.40 (0.37, 0.44)	0.90 (0.90, 0.91)	0.72 (0.69, 0.74)
0.3	0.6	100	150	0.5	Tight Linkage	BayesC	0.36 (0.31, 0.40)	0.66 (0.64, 0.68)	0.40 (0.37, 0.43)	0.91 (0.90, 0.92)	0.76 (0.73, 0.79)
0.3	0.6	100	150	0.5	Tight Linkage	RRBLUP	0.36 (0.32, 0.40)	0.68 (0.66, 0.70)	0.44 (0.41, 0.48)	0.90 (0.89, 0.91)	0.76 (0.73, 0.78)
0.3	0.6	100	150	0.5	Pleiotropy	BayesC	0.25 (0.21, 0.29)	0.68 (0.66, 0.70)	0.44 (0.41, 0.47)	0.83 (0.82, 0.84)	0.49 (0.45, 0.52)
0.3	0.6	100	150	0.5	Pleiotropy	RRBLUP	0.24 (0.20, 0.28)	0.68 (0.65, 0.70)	0.42 (0.39, 0.45)	0.83 (0.81, 0.84)	0.50 (0.46, 0.53)
0.3	0.6	100	300	-0.5	Loose Linkage	BayesC	0.39 (0.36, 0.42)	0.72 (0.70, 0.74)	0.49 (0.46, 0.52)	0.93 (0.93, 0.94)	0.78 (0.76, 0.80)
0.3	0.6	100	300	-0.5	Loose Linkage	RRBLUP	0.37 (0.34, 0.41)	0.72 (0.70, 0.74)	0.46 (0.43, 0.50)	0.92 (0.92, 0.93)	0.74 (0.71, 0.76)
0.3	0.6	100	300	-0.5	Tight Linkage	BayesC	0.41 (0.37, 0.44)	0.71 (0.69, 0.73)	0.47 (0.44, 0.50)	0.93 (0.92, 0.93)	0.79 (0.76, 0.81)
0.3	0.6	100	300	-0.5	Tight Linkage	RRBLUP	0.43 (0.40, 0.47)	0.71 (0.69, 0.73)	0.45 (0.42, 0.48)	0.93 (0.93, 0.94)	0.79 (0.77, 0.81)
0.3	0.6	100	300	-0.5	Pleiotropy	BayesC	0.33 (0.29, 0.37)	0.71 (0.69, 0.73)	0.50 (0.47, 0.53)	0.84 (0.83, 0.85)	0.57 (0.55, 0.60)
0.3	0.6	100	300	-0.5	Pleiotropy	RRBLUP	0.34 (0.30, 0.37)	0.72 (0.70, 0.74)	0.47 (0.43, 0.50)	0.85 (0.84, 0.86)	0.59 (0.56, 0.62)
0.3	0.6	100	300	0	Loose Linkage	BayesC	0.36 (0.33, 0.40)	0.71 (0.69, 0.73)	0.45 (0.42, 0.49)	0.93 (0.92, 0.93)	0.76 (0.74, 0.79)
0.3	0.6	100	300	0	Loose Linkage	RRBLUP	0.41 (0.37, 0.44)	0.71 (0.69, 0.73)	0.47 (0.44, 0.50)	0.93 (0.93, 0.94)	0.77 (0.75, 0.79)
0.3	0.6	100	300	0	Tight Linkage	BayesC	0.46 (0.43, 0.50)	0.71 (0.69, 0.73)	0.48 (0.45, 0.50)	0.93 (0.93, 0.94)	0.82 (0.79, 0.84)
0.3	0.6	100	300	0	Tight Linkage	RRBLUP	0.44 (0.40, 0.48)	0.72 (0.70, 0.74)	0.42 (0.39, 0.45)	0.93 (0.93, 0.94)	0.81 (0.79, 0.83)
0.3	0.6	100	300	0	Pleiotropy	BayesC	0.33 (0.30, 0.36)	0.72 (0.70, 0.74)	0.47 (0.44, 0.50)	0.85 (0.84, 0.86)	0.56 (0.53, 0.59)
0.3	0.6	100	300	0	Pleiotropy	RRBLUP	0.34 (0.30, 0.38)	0.72 (0.71, 0.74)	0.48 (0.44, 0.51)	0.85 (0.84, 0.86)	0.57 (0.55, 0.60)
0.3	0.6	100	300	0.5	Loose Linkage	BayesC	0.38 (0.34, 0.41)	0.73 (0.71, 0.75)	0.51 (0.48, 0.54)	0.93 (0.92, 0.93)	0.77 (0.75, 0.79)
0.3	0.6	100	300	0.5	Loose Linkage	RRBLUP	0.38 (0.35, 0.41)	0.71 (0.69, 0.73)	0.47 (0.44, 0.51)	0.93 (0.92, 0.93)	0.76 (0.73, 0.78)
0.3	0.6	100	300	0.5	Tight Linkage	BayesC	0.40 (0.36, 0.43)	0.71 (0.70, 0.73)	0.47 (0.44, 0.50)	0.93 (0.92, 0.93)	0.81 (0.79, 0.83)
0.3	0.6	100	300	0.5	Tight Linkage	RRBLUP	0.42 (0.38, 0.46)	0.69 (0.67, 0.72)	0.47 (0.44, 0.51)	0.93 (0.93, 0.94)	0.81 (0.78, 0.83)
0.3	0.6	100	300	0.5	Pleiotropy	BayesC	0.30 (0.27, 0.34)	0.72 (0.70, 0.73)	0.50 (0.47, 0.53)	0.85 (0.84, 0.86)	0.57 (0.54, 0.60)
0.3	0.6	100	300	0.5	Pleiotropy	RRBLUP	0.33 (0.29, 0.36)	0.71 (0.69, 0.73)	0.45 (0.42, 0.49)	0.85 (0.84, 0.86)	0.55 (0.52, 0.58)
0.3	0.6	100	450	-0.5	Loose Linkage	BayesC	0.45 (0.41, 0.48)	0.73 (0.71, 0.75)	0.50 (0.47, 0.53)	0.94 (0.93, 0.94)	0.79 (0.77, 0.81)
0.3	0.6	100	450	-0.5	Loose Linkage	RRBLUP	0.44 (0.40, 0.47)	0.76 (0.74, 0.77)	0.49 (0.46, 0.52)	0.94 (0.94, 0.94)	0.80 (0.78, 0.82)
0.3	0.6	100	450	-0.5	Tight Linkage	BayesC	0.49 (0.46, 0.53)	0.73 (0.71, 0.75)	0.51 (0.48, 0.55)	0.94 (0.93, 0.94)	0.82 (0.80, 0.84)
0.3	0.6	100	450	-0.5	Tight Linkage	RRBLUP	0.49 (0.45, 0.52)	0.76 (0.74, 0.77)	0.49 (0.46, 0.52)	0.93 (0.93, 0.94)	0.82 (0.80, 0.84)
0.3	0.6	100	450	-0.5	Pleiotropy	BayesC	0.37 (0.34, 0.40)	0.73 (0.72, 0.75)	0.51 (0.48, 0.53)	0.85 (0.84, 0.86)	0.61 (0.58, 0.63)
0.3	0.6	100	450	-0.5	Pleiotropy	RRBLUP	0.41 (0.37, 0.44)	0.74 (0.72, 0.75)	0.50 (0.46, 0.53)	0.86 (0.85, 0.87)	0.64 (0.62, 0.67)
0.3	0.6	100	450	0	Loose Linkage	BayesC	0.41 (0.38, 0.45)	0.74 (0.73, 0.76)	0.52 (0.48, 0.55)	0.93 (0.93, 0.94)	0.78 (0.75, 0.80)
0.3	0.6	100	450	0	Loose Linkage	RRBLUP	0.44 (0.41, 0.47)	0.75 (0.74, 0.77)	0.51 (0.47, 0.54)	0.94 (0.94, 0.95)	0.80 (0.78, 0.82)
0.3	0.6	100	450	0	Tight Linkage	BayesC	0.47 (0.44, 0.51)	0.73 (0.71, 0.74)	0.51 (0.48, 0.54)	0.94 (0.94, 0.95)	0.85 (0.83, 0.86)
0.3	0.6	100	450	0	Tight Linkage	RRBLUP	0.45 (0.42, 0.49)	0.74 (0.72, 0.75)	0.50 (0.47, 0.53)	0.94 (0.93, 0.94)	0.83 (0.81, 0.85)
0.3	0.6	100	450	0	Pleiotropy	BayesC	0.41 (0.38, 0.44)	0.73 (0.72, 0.75)	0.53 (0.50, 0.56)	0.86 (0.85, 0.87)	0.63 (0.61, 0.66)
0.3	0.6	100	450	0	Pleiotropy	RRBLUP	0.39 (0.36, 0.43)	0.75 (0.74, 0.77)	0.50 (0.46, 0.53)	0.87 (0.86, 0.87)	0.61 (0.58, 0.64)
0.3	0.6	100	450	0.5	Loose Linkage	BayesC	0.43 (0.40, 0.47)	0.73 (0.72, 0.75)	0.50 (0.47, 0.53)	0.93 (0.93, 0.94)	0.78 (0.75, 0.80)
0.3	0.6	100	450	0.5	Loose Linkage	RRBLUP	0.45 (0.42, 0.48)	0.74 (0.72, 0.75)	0.53 (0.50, 0.56)	0.94 (0.93, 0.94)	0.78 (0.76, 0.80)
0.3	0.6	100	450	0.5	Tight Linkage	BayesC	0.48 (0.45, 0.51)	0.73 (0.71, 0.75)	0.50 (0.47, 0.53)	0.94 (0.94, 0.95)	0.83 (0.81, 0.85)
0.3	0.6	100	450	0.5	Tight Linkage	RRBLUP	0.50 (0.46, 0.53)	0.74 (0.72, 0.75)	0.51 (0.48, 0.54)	0.94 (0.94, 0.95)	0.84 (0.82, 0.86)
0.3	0.6	100	450	0.5	Pleiotropy	BayesC	0.38 (0.34, 0.42)	0.75 (0.74, 0.77)	0.52 (0.48, 0.55)	0.86 (0.85, 0.87)	0.63 (0.61, 0.66)
0.3	0.6	100	450	0.5	Pleiotropy	RRBLUP	0.38 (0.35, 0.42)	0.74 (0.72, 0.76)	0.51 (0.48, 0.54)	0.87 (0.86, 0.87)	0.61 (0.58, 0.63)
0.3	0.6	100	600	-0.5	Loose Linkage	BayesC	0.43 (0.40, 0.46)	0.76 (0.74, 0.77)	0.55 (0.52, 0.58)	0.94 (0.93, 0.94)	0.79 (0.77, 0.81)
0.3	0.6	100	600	-0.5	Loose Linkage	RRBLUP	0.44 (0.41, 0.47)	0.77 (0.75, 0.78)	0.55 (0.52, 0.58)	0.94 (0.94, 0.95)	0.79 (0.77, 0.82)
0.3	0.6	100	600	-0.5	Tight Linkage	BayesC	0.49 (0.45, 0.52)	0.76 (0.74, 0.77)	0.52 (0.49, 0.55)	0.94 (0.94, 0.95)	0.85 (0.83, 0.86)
0.3	0.6	100	600	-0.5	Tight Linkage	RRBLUP	0.52 (0.49, 0.56)	0.75 (0.74, 0.77)	0.52 (0.49, 0.55)	0.95 (0.94, 0.95)	0.84 (0.81, 0.86)
0.3	0.6	100	600	-0.5	Pleiotropy	BayesC	0.37 (0.34, 0.40)	0.77 (0.76, 0.78)	0.54 (0.51, 0.56)	0.87 (0.86, 0.88)	0.65 (0.62, 0.67)
0.3	0.6	100	600	-0.5	Pleiotropy	RRBLUP	0.42 (0.40, 0.45)	0.76 (0.75, 0.77)	0.53 (0.50, 0.55)	0.87 (0.87, 0.88)	0.63 (0.60, 0.65)
0.3	0.6	100	600	0	Loose Linkage	BayesC	0.46 (0.43, 0.49)	0.75 (0.73, 0.76)	0.53 (0.50, 0.56)	0.94 (0.94, 0.95)	0.81 (0.79, 0.83)
0.3	0.6	100	600	0	Loose Linkage	RRBLUP	0.48 (0.45, 0.51)	0.76 (0.75, 0.77)	0.55 (0.52, 0.57)	0.94 (0.93, 0.95)	0.79 (0.77, 0.81)
0.3	0.6	100	600	0	Tight Linkage	BayesC	0.52 (0.49, 0.56)	0.75 (0.74, 0.77)	0.52 (0.49, 0.55)	0.95 (0.95, 0.95)	0.85 (0.83, 0.87)
0.3	0.6	100	600	0	Tight Linkage	RRBLUP	0.53 (0.49, 0.57)	0.76 (0.75, 0.77)	0.52 (0.49, 0.55)	0.95 (0.94, 0.95)	0.85 (0.83, 0.87)
0.3	0.6	100	600	0	Pleiotropy	BayesC	0.45 (0.42, 0.48)	0.76 (0.75, 0.78)	0.55 (0.52, 0.59)	0.86 (0.86, 0.87)	0.67 (0.64, 0.69)
0.3	0.6	100	600	0	Pleiotropy	RRBLUP	0.46 (0.43, 0.49)	0.78 (0.76, 0.79)	0.53 (0.50, 0.56)	0.87 (0.86, 0.88)	0.64 (0.62, 0.66)
0.3	0.6	100	600	0.5	Loose Linkage	BayesC	0.45 (0.41, 0.48)	0.75 (0.73, 0.76)	0.53 (0.50, 0.56)	0.94 (0.94, 0.95)	0.82 (0.80, 0.84)
0.3	0.6	100	600	0.5	Loose Linkage	RRBLUP	0.49 (0.46, 0.52)	0.76 (0.74, 0.78)	0.53 (0.50, 0.55)	0.94 (0.94, 0.95)	0.80 (0.78, 0.82)
0.3	0.6	100	600	0.5	Tight Linkage	BayesC	0.52 (0.48, 0.55)	0.76 (0.75, 0.78)	0.54 (0.50, 0.57)	0.95 (0.94, 0.95)	0.85 (0.83, 0.86)
0.3	0.6	100	600	0.5	Tight Linkage	RRBLUP	0.53 (0.50, 0.56)	0.76 (0.75, 0.78)	0.50 (0.47, 0.52)	0.95 (0.94, 0.95)	0.85 (0.83, 0.86)
0.3	0.6	100	600	0.5	Pleiotropy	BayesC	0.42 (0.40, 0.45)	0.75 (0.74, 0.77)	0.56 (0.53, 0.58)	0.87 (0.86, 0.88)	0.67 (0.65, 0.69)
0.3	0.6	100	600	0.5	Pleiotropy	RRBLUP	0.42 (0.38, 0.45)	0.77 (0.76, 0.78)	0.53 (0.50, 0.56)	0.88 (0.87, 0.88)	0.63 (0.61, 0.66)
0.3	1	30	150	-0.5	Loose Linkage	BayesC	0.35 (0.31, 0.38)	0.69 (0.66, 0.71)	0.39 (0.35, 0.43)	0.98 (0.97, 0.98)	0.81 (0.78, 0.83)
0.3	1	30	150	-0.5	Loose Linkage	RRBLUP	0.35 (0.31, 0.39)	0.67 (0.65, 0.69)	0.36 (0.33, 0.40)	1.00 (1.00, 1.00)	0.80 (0.78, 0.82)
0.3	1	30	150	-0.5	Tight Linkage	BayesC	0.42 (0.38, 0.46)	0.67 (0.65, 0.68)	0.39 (0.35, 0.43)	0.97 (0.96, 0.98)	0.83 (0.81, 0.86)
0.3	1	30	150	-0.5	Tight Linkage	RRBLUP	0.38 (0.34, 0.42)	0.67 (0.64, 0.69)	0.40 (0.36, 0.43)	1.00 (1.00, 1.00)	0.83 (0.81, 0.86)
0.3	1	30	150	-0.5	Pleiotropy	BayesC	0.30 (0.26, 0.33)	0.67 (0.65, 0.69)	0.41 (0.38, 0.44)	0.96 (0.96, 0.97)	0.66 (0.63, 0.69)
0.3	1	30	150	-0.5	Pleiotropy	RRBLUP	0.29 (0.25, 0.33)	0.67 (0.65, 0.69)	0.37 (0.33, 0.41)	1.00 (1.00, 1.00)	0.64 (0.61, 0.66)
0.3	1	30	150	0	Loose Linkage	BayesC	0.35 (0.31, 0.39)	0.66 (0.63, 0.68)	0.41 (0.38, 0.45)	0.97 (0.97, 0.98)	0.79 (0.77, 0.82)
0.3	1	30	150	0	Loose Linkage	RRBLUP	0.33 (0.30, 0.37)	0.68 (0.66, 0.70)	0.41 (0.38, 0.45)	1.00 (1.00, 1.00)	0.78 (0.76, 0.81)
0.3	1	30	150	0	Tight Linkage	BayesC	0.36 (0.32, 0.40)	0.66 (0.63, 0.68)	0.40 (0.36, 0.43)	0.98 (0.97, 0.98)	0.84 (0.82, 0.86)
0.3	1	30	150	0	Tight Linkage	RRBLUP	0.39 (0.34, 0.43)	0.66 (0.64, 0.68)	0.36 (0.32, 0.40)	1.00 (1.00, 1.00)	0.79 (0.76, 0.81)
0.3	1	30	150	0	Pleiotropy	BayesC	0.38 (0.34, 0.41)	0.69 (0.67, 0.71)	0.40 (0.36, 0.43)	0.97 (0.97, 0.97)	0.66 (0.63, 0.69)
0.3	1	30	150	0	Pleiotropy	RRBLUP	0.34 (0.31, 0.38)	0.67 (0.65, 0.69)	0.41 (0.38, 0.44)	1.00 (1.00, 1.00)	0.62 (0.60, 0.65)
0.3	1	30	150	0.5	Loose Linkage	BayesC	0.35 (0.31, 0.39)	0.66 (0.64, 0.69)	0.41 (0.37, 0.44)	0.97 (0.97, 0.98)	0.78 (0.75, 0.81)
0.3	1	30	150	0.5	Loose Linkage	RRBLUP	0.33 (0.29, 0.37)	0.68 (0.66, 0.70)	0.42 (0.38, 0.45)	1.00 (1.00, 1.00)	0.79 (0.77, 0.81)
0.3	1	30	150	0.5	Tight Linkage	BayesC	0.38 (0.33, 0.42)	0.64 (0.62, 0.66)	0.37 (0.34, 0.40)	0.97 (0.97, 0.98)	0.86 (0.83, 0.88)
0.3	1	30	150	0.5	Tight Linkage	RRBLUP	0.39 (0.35, 0.43)	0.69 (0.67, 0.71)	0.38 (0.34, 0.42)	1.00 (1.00, 1.00)	0.80 (0.77, 0.83)
0.3	1	30	150	0.5	Pleiotropy	BayesC	0.31 (0.27, 0.35)	0.67 (0.65, 0.69)	0.40 (0.36, 0.44)	0.96 (0.96, 0.97)	0.66 (0.63, 0.69)
0.3	1	30	150	0.5	Pleiotropy	RRBLUP	0.29 (0.26, 0.33)	0.67 (0.65, 0.69)	0.38 (0.34, 0.42)	1.00 (1.00, 1.00)	0.64 (0.61, 0.67)
0.3	1	30	300	-0.5	Loose Linkage	BayesC	0.42 (0.38, 0.45)	0.71 (0.69, 0.72)	0.42 (0.39, 0.46)	0.95 (0.94, 0.96)	0.86 (0.85, 0.88)
0.3	1	30	300	-0.5	Loose Linkage	RRBLUP	0.41 (0.37, 0.45)	0.72 (0.70, 0.74)	0.43 (0.40, 0.47)	1.00 (1.00, 1.00)	0.83 (0.81, 0.85)
0.3	1	30	300	-0.5	Tight Linkage	BayesC	0.51 (0.48, 0.55)	0.72 (0.70, 0.73)	0.47 (0.43, 0.50)	0.95 (0.94, 0.95)	0.90 (0.88, 0.91)
0.3	1	30	300	-0.5	Tight Linkage	RRBLUP	0.48 (0.44, 0.52)	0.72 (0.70, 0.74)	0.45 (0.41, 0.48)	1.00 (1.00, 1.00)	0.88 (0.86, 0.89)
0.3	1	30	300	-0.5	Pleiotropy	BayesC	0.39 (0.35, 0.42)	0.72 (0.70, 0.73)	0.46 (0.43, 0.49)	0.93 (0.92, 0.93)	0.77 (0.75, 0.80)
0.3	1	30	300	-0.5	Pleiotropy	RRBLUP	0.38 (0.35, 0.42)	0.72 (0.70, 0.73)	0.45 (0.41, 0.49)	1.00 (1.00, 1.00)	0.73 (0.71, 0.75)
0.3	1	30	300	0	Loose Linkage	BayesC	0.40 (0.36, 0.44)	0.73 (0.71, 0.74)	0.50 (0.47, 0.54)	0.95 (0.95, 0.96)	0.86 (0.84, 0.87)
0.3	1	30	300	0	Loose Linkage	RRBLUP	0.40 (0.36, 0.43)	0.73 (0.71, 0.75)	0.44 (0.41, 0.48)	1.00 (1.00, 1.00)	0.84 (0.83, 0.86)
0.3	1	30	300	0	Tight Linkage	BayesC	0.49 (0.45, 0.53)	0.71 (0.69, 0.72)	0.45 (0.42, 0.49)	0.95 (0.94, 0.96)	0.89 (0.88, 0.91)
0.3	1	30	300	0	Tight Linkage	RRBLUP	0.50 (0.46, 0.54)	0.72 (0.71, 0.74)	0.42 (0.38, 0.45)	1.00 (1.00, 1.00)	0.85 (0.83, 0.87)
0.3	1	30	300	0	Pleiotropy	BayesC	0.46 (0.42, 0.49)	0.73 (0.71, 0.75)	0.48 (0.44, 0.51)	0.93 (0.92, 0.94)	0.78 (0.75, 0.80)
0.3	1	30	300	0	Pleiotropy	RRBLUP	0.43 (0.39, 0.46)	0.70 (0.68, 0.72)	0.43 (0.40, 0.47)	1.00 (1.00, 1.00)	0.71 (0.69, 0.74)
0.3	1	30	300	0.5	Loose Linkage	BayesC	0.41 (0.37, 0.45)	0.70 (0.68, 0.72)	0.48 (0.44, 0.52)	0.95 (0.95, 0.96)	0.86 (0.85, 0.88)
0.3	1	30	300	0.5	Loose Linkage	RRBLUP	0.39 (0.35, 0.43)	0.71 (0.69, 0.73)	0.45 (0.41, 0.48)	1.00 (1.00, 1.00)	0.82 (0.80, 0.84)
0.3	1	30	300	0.5	Tight Linkage	BayesC	0.48 (0.44, 0.51)	0.70 (0.68, 0.73)	0.46 (0.42, 0.49)	0.95 (0.94, 0.95)	0.88 (0.86, 0.89)
0.3	1	30	300	0.5	Tight Linkage	RRBLUP	0.51 (0.47, 0.55)	0.72 (0.70, 0.74)	0.47 (0.43, 0.51)	1.00 (1.00, 1.00)	0.87 (0.85, 0.89)
0.3	1	30	300	0.5	Pleiotropy	BayesC	0.40 (0.36, 0.43)	0.70 (0.69, 0.72)	0.45 (0.42, 0.48)	0.92 (0.91, 0.93)	0.80 (0.78, 0.81)
0.3	1	30	300	0.5	Pleiotropy	RRBLUP	0.40 (0.37, 0.44)	0.71 (0.70, 0.73)	0.44 (0.40, 0.48)	1.00 (1.00, 1.00)	0.72 (0.70, 0.75)
0.3	1	30	450	-0.5	Loose Linkage	BayesC	0.44 (0.41, 0.48)	0.73 (0.71, 0.75)	0.51 (0.48, 0.54)	0.96 (0.95, 0.96)	0.87 (0.86, 0.89)
0.3	1	30	450	-0.5	Loose Linkage	RRBLUP	0.44 (0.40, 0.48)	0.73 (0.72, 0.75)	0.50 (0.46, 0.53)	1.00 (1.00, 1.00)	0.84 (0.82, 0.86)
0.3	1	30	450	-0.5	Tight Linkage	BayesC	0.54 (0.51, 0.58)	0.75 (0.73, 0.76)	0.51 (0.48, 0.55)	0.96 (0.95, 0.96)	0.90 (0.89, 0.91)
0.3	1	30	450	-0.5	Tight Linkage	RRBLUP	0.55 (0.51, 0.59)	0.74 (0.73, 0.76)	0.52 (0.49, 0.55)	1.00 (1.00, 1.00)	0.89 (0.88, 0.91)
0.3	1	30	450	-0.5	Pleiotropy	BayesC	0.45 (0.42, 0.49)	0.74 (0.72, 0.75)	0.51 (0.48, 0.54)	0.92 (0.91, 0.93)	0.82 (0.81, 0.84)
0.3	1	30	450	-0.5	Pleiotropy	RRBLUP	0.45 (0.42, 0.48)	0.74 (0.73, 0.76)	0.52 (0.49, 0.55)	1.00 (0.99, 1.00)	0.76 (0.74, 0.78)
0.3	1	30	450	0	Loose Linkage	BayesC	0.45 (0.42, 0.49)	0.74 (0.72, 0.76)	0.53 (0.50, 0.56)	0.96 (0.95, 0.96)	0.87 (0.85, 0.89)
0.3	1	30	450	0	Loose Linkage	RRBLUP	0.46 (0.43, 0.49)	0.74 (0.72, 0.76)	0.48 (0.45, 0.52)	1.00 (1.00, 1.00)	0.87 (0.86, 0.89)
0.3	1	30	450	0	Tight Linkage	BayesC	0.54 (0.51, 0.57)	0.76 (0.74, 0.77)	0.52 (0.48, 0.55)	0.96 (0.95, 0.96)	0.91 (0.90, 0.92)
0.3	1	30	450	0	Tight Linkage	RRBLUP	0.56 (0.52, 0.60)	0.74 (0.72, 0.76)	0.47 (0.43, 0.50)	1.00 (1.00, 1.00)	0.89 (0.88, 0.91)
0.3	1	30	450	0	Pleiotropy	BayesC	0.54 (0.51, 0.56)	0.74 (0.72, 0.76)	0.53 (0.49, 0.56)	0.93 (0.92, 0.94)	0.81 (0.79, 0.83)
0.3	1	30	450	0	Pleiotropy	RRBLUP	0.51 (0.49, 0.54)	0.73 (0.72, 0.75)	0.50 (0.47, 0.54)	1.00 (1.00, 1.00)	0.76 (0.74, 0.78)
0.3	1	30	450	0.5	Loose Linkage	BayesC	0.47 (0.43, 0.50)	0.73 (0.72, 0.75)	0.52 (0.49, 0.56)	0.95 (0.95, 0.96)	0.87 (0.85, 0.88)
0.3	1	30	450	0.5	Loose Linkage	RRBLUP	0.45 (0.41, 0.49)	0.74 (0.73, 0.76)	0.52 (0.49, 0.54)	1.00 (1.00, 1.00)	0.86 (0.84, 0.88)
0.3	1	30	450	0.5	Tight Linkage	BayesC	0.54 (0.50, 0.57)	0.74 (0.73, 0.76)	0.53 (0.50, 0.56)	0.95 (0.95, 0.96)	0.91 (0.90, 0.93)
0.3	1	30	450	0.5	Tight Linkage	RRBLUP	0.50 (0.46, 0.53)	0.74 (0.72, 0.75)	0.49 (0.45, 0.52)	1.00 (1.00, 1.00)	0.87 (0.86, 0.89)
0.3	1	30	450	0.5	Pleiotropy	BayesC	0.49 (0.46, 0.53)	0.74 (0.72, 0.75)	0.54 (0.51, 0.57)	0.92 (0.91, 0.93)	0.82 (0.80, 0.83)
0.3	1	30	450	0.5	Pleiotropy	RRBLUP	0.47 (0.43, 0.50)	0.74 (0.73, 0.76)	0.48 (0.44, 0.52)	1.00 (1.00, 1.00)	0.78 (0.76, 0.79)
0.3	1	30	600	-0.5	Loose Linkage	BayesC	0.52 (0.49, 0.56)	0.76 (0.75, 0.78)	0.55 (0.52, 0.58)	0.96 (0.95, 0.96)	0.88 (0.87, 0.90)
0.3	1	30	600	-0.5	Loose Linkage	RRBLUP	0.47 (0.43, 0.51)	0.75 (0.73, 0.77)	0.52 (0.49, 0.55)	1.00 (1.00, 1.00)	0.87 (0.85, 0.88)
0.3	1	30	600	-0.5	Tight Linkage	BayesC	0.56 (0.52, 0.59)	0.75 (0.74, 0.77)	0.55 (0.53, 0.58)	0.96 (0.96, 0.97)	0.91 (0.90, 0.93)
0.3	1	30	600	-0.5	Tight Linkage	RRBLUP	0.59 (0.56, 0.63)	0.75 (0.73, 0.76)	0.52 (0.48, 0.55)	1.00 (1.00, 1.00)	0.91 (0.89, 0.92)
0.3	1	30	600	-0.5	Pleiotropy	BayesC	0.50 (0.47, 0.54)	0.77 (0.75, 0.78)	0.54 (0.51, 0.57)	0.92 (0.91, 0.93)	0.82 (0.81, 0.84)
0.3	1	30	600	-0.5	Pleiotropy	RRBLUP	0.51 (0.48, 0.54)	0.77 (0.76, 0.79)	0.56 (0.53, 0.60)	1.00 (0.99, 1.00)	0.80 (0.78, 0.82)
0.3	1	30	600	0	Loose Linkage	BayesC	0.53 (0.50, 0.56)	0.78 (0.77, 0.79)	0.54 (0.51, 0.57)	0.96 (0.95, 0.96)	0.87 (0.85, 0.88)
0.3	1	30	600	0	Loose Linkage	RRBLUP	0.50 (0.47, 0.54)	0.76 (0.75, 0.78)	0.52 (0.49, 0.55)	1.00 (1.00, 1.00)	0.87 (0.85, 0.89)
0.3	1	30	600	0	Tight Linkage	BayesC	0.58 (0.54, 0.61)	0.77 (0.75, 0.78)	0.57 (0.54, 0.59)	0.96 (0.95, 0.96)	0.91 (0.90, 0.92)
0.3	1	30	600	0	Tight Linkage	RRBLUP	0.57 (0.53, 0.60)	0.75 (0.74, 0.76)	0.52 (0.49, 0.55)	1.00 (1.00, 1.00)	0.89 (0.87, 0.91)
0.3	1	30	600	0	Pleiotropy	BayesC	0.58 (0.55, 0.60)	0.77 (0.76, 0.79)	0.55 (0.52, 0.58)	0.93 (0.93, 0.94)	0.83 (0.81, 0.85)
0.3	1	30	600	0	Pleiotropy	RRBLUP	0.53 (0.50, 0.57)	0.76 (0.75, 0.78)	0.53 (0.50, 0.56)	1.00 (0.99, 1.00)	0.80 (0.78, 0.82)
0.3	1	30	600	0.5	Loose Linkage	BayesC	0.51 (0.48, 0.54)	0.77 (0.76, 0.79)	0.55 (0.52, 0.58)	0.96 (0.96, 0.96)	0.90 (0.89, 0.91)
0.3	1	30	600	0.5	Loose Linkage	RRBLUP	0.49 (0.46, 0.52)	0.77 (0.75, 0.78)	0.56 (0.52, 0.59)	1.00 (1.00, 1.00)	0.88 (0.86, 0.89)
0.3	1	30	600	0.5	Tight Linkage	BayesC	0.59 (0.56, 0.63)	0.77 (0.76, 0.78)	0.58 (0.55, 0.62)	0.96 (0.96, 0.97)	0.91 (0.90, 0.93)
0.3	1	30	600	0.5	Tight Linkage	RRBLUP	0.58 (0.55, 0.61)	0.76 (0.75, 0.78)	0.53 (0.50, 0.56)	1.00 (1.00, 1.00)	0.89 (0.87, 0.91)
0.3	1	30	600	0.5	Pleiotropy	BayesC	0.51 (0.47, 0.54)	0.76 (0.75, 0.78)	0.56 (0.53, 0.59)	0.93 (0.92, 0.93)	0.83 (0.81, 0.84)
0.3	1	30	600	0.5	Pleiotropy	RRBLUP	0.50 (0.47, 0.53)	0.75 (0.74, 0.77)	0.52 (0.49, 0.56)	1.00 (0.99, 1.00)	0.80 (0.78, 0.82)
0.3	1	100	150	-0.5	Loose Linkage	BayesC	0.38 (0.34, 0.41)	0.68 (0.65, 0.70)	0.44 (0.41, 0.47)	0.99 (0.99, 0.99)	0.86 (0.84, 0.87)
0.3	1	100	150	-0.5	Loose Linkage	RRBLUP	0.37 (0.33, 0.41)	0.67 (0.65, 0.69)	0.37 (0.34, 0.41)	1.00 (1.00, 1.00)	0.87 (0.86, 0.89)
0.3	1	100	150	-0.5	Tight Linkage	BayesC	0.41 (0.37, 0.45)	0.67 (0.65, 0.69)	0.40 (0.37, 0.43)	0.99 (0.99, 0.99)	0.90 (0.88, 0.91)
0.3	1	100	150	-0.5	Tight Linkage	RRBLUP	0.41 (0.37, 0.45)	0.67 (0.65, 0.70)	0.42 (0.39, 0.45)	1.00 (1.00, 1.00)	0.91 (0.89, 0.92)
0.3	1	100	150	-0.5	Pleiotropy	BayesC	0.28 (0.24, 0.31)	0.69 (0.67, 0.71)	0.46 (0.43, 0.49)	0.98 (0.97, 0.98)	0.62 (0.59, 0.65)
0.3	1	100	150	-0.5	Pleiotropy	RRBLUP	0.31 (0.27, 0.34)	0.66 (0.64, 0.69)	0.41 (0.38, 0.45)	1.00 (1.00, 1.00)	0.60 (0.57, 0.63)
0.3	1	100	150	0	Loose Linkage	BayesC	0.40 (0.37, 0.44)	0.65 (0.63, 0.68)	0.40 (0.37, 0.43)	0.99 (0.99, 0.99)	0.87 (0.85, 0.88)
0.3	1	100	150	0	Loose Linkage	RRBLUP	0.42 (0.39, 0.46)	0.67 (0.64, 0.69)	0.40 (0.36, 0.43)	1.00 (1.00, 1.00)	0.89 (0.88, 0.90)
0.3	1	100	150	0	Tight Linkage	BayesC	0.44 (0.40, 0.48)	0.68 (0.66, 0.70)	0.42 (0.39, 0.46)	0.99 (0.99, 0.99)	0.89 (0.87, 0.90)
0.3	1	100	150	0	Tight Linkage	RRBLUP	0.44 (0.40, 0.49)	0.68 (0.65, 0.70)	0.38 (0.35, 0.41)	1.00 (1.00, 1.00)	0.90 (0.88, 0.91)
0.3	1	100	150	0	Pleiotropy	BayesC	0.29 (0.26, 0.32)	0.65 (0.63, 0.67)	0.40 (0.37, 0.43)	0.97 (0.97, 0.98)	0.61 (0.58, 0.64)
0.3	1	100	150	0	Pleiotropy	RRBLUP	0.33 (0.29, 0.37)	0.69 (0.67, 0.71)	0.47 (0.44, 0.50)	1.00 (1.00, 1.00)	0.62 (0.59, 0.65)
0.3	1	100	150	0.5	Loose Linkage	BayesC	0.40 (0.36, 0.44)	0.67 (0.64, 0.69)	0.41 (0.37, 0.44)	0.99 (0.99, 0.99)	0.86 (0.84, 0.87)
0.3	1	100	150	0.5	Loose Linkage	RRBLUP	0.39 (0.36, 0.42)	0.68 (0.66, 0.70)	0.38 (0.35, 0.42)	1.00 (1.00, 1.00)	0.85 (0.84, 0.87)
0.3	1	100	150	0.5	Tight Linkage	BayesC	0.43 (0.40, 0.47)	0.67 (0.65, 0.69)	0.41 (0.38, 0.44)	0.99 (0.99, 0.99)	0.90 (0.88, 0.91)
0.3	1	100	150	0.5	Tight Linkage	RRBLUP	0.44 (0.39, 0.48)	0.67 (0.64, 0.69)	0.43 (0.39, 0.46)	1.00 (1.00, 1.00)	0.91 (0.89, 0.92)
0.3	1	100	150	0.5	Pleiotropy	BayesC	0.31 (0.28, 0.34)	0.69 (0.67, 0.71)	0.43 (0.40, 0.47)	0.98 (0.97, 0.98)	0.60 (0.57, 0.63)
0.3	1	100	150	0.5	Pleiotropy	RRBLUP	0.30 (0.26, 0.33)	0.65 (0.63, 0.67)	0.42 (0.38, 0.45)	1.00 (1.00, 1.00)	0.63 (0.60, 0.65)
0.3	1	100	300	-0.5	Loose Linkage	BayesC	0.46 (0.43, 0.50)	0.72 (0.70, 0.74)	0.46 (0.43, 0.49)	0.99 (0.99, 0.99)	0.90 (0.89, 0.92)
0.3	1	100	300	-0.5	Loose Linkage	RRBLUP	0.43 (0.40, 0.47)	0.72 (0.70, 0.73)	0.49 (0.45, 0.52)	1.00 (1.00, 1.00)	0.90 (0.89, 0.92)
0.3	1	100	300	-0.5	Tight Linkage	BayesC	0.52 (0.49, 0.56)	0.72 (0.70, 0.74)	0.48 (0.45, 0.52)	0.99 (0.98, 0.99)	0.94 (0.93, 0.95)
0.3	1	100	300	-0.5	Tight Linkage	RRBLUP	0.52 (0.49, 0.55)	0.71 (0.70, 0.73)	0.47 (0.44, 0.50)	1.00 (1.00, 1.00)	0.93 (0.92, 0.94)
0.3	1	100	300	-0.5	Pleiotropy	BayesC	0.38 (0.35, 0.42)	0.72 (0.71, 0.74)	0.48 (0.45, 0.51)	0.97 (0.97, 0.98)	0.73 (0.71, 0.75)
0.3	1	100	300	-0.5	Pleiotropy	RRBLUP	0.37 (0.34, 0.41)	0.71 (0.69, 0.73)	0.47 (0.44, 0.50)	1.00 (1.00, 1.00)	0.71 (0.69, 0.73)
0.3	1	100	300	0	Loose Linkage	BayesC	0.47 (0.43, 0.50)	0.71 (0.70, 0.73)	0.48 (0.45, 0.51)	0.99 (0.99, 0.99)	0.90 (0.89, 0.92)
0.3	1	100	300	0	Loose Linkage	RRBLUP	0.45 (0.42, 0.48)	0.71 (0.69, 0.73)	0.47 (0.44, 0.51)	1.00 (1.00, 1.00)	0.90 (0.89, 0.91)
0.3	1	100	300	0	Tight Linkage	BayesC	0.52 (0.48, 0.55)	0.72 (0.70, 0.73)	0.48 (0.45, 0.51)	0.99 (0.99, 0.99)	0.93 (0.92, 0.94)
0.3	1	100	300	0	Tight Linkage	RRBLUP	0.48 (0.44, 0.52)	0.70 (0.68, 0.72)	0.45 (0.41, 0.48)	1.00 (1.00, 1.00)	0.92 (0.91, 0.94)
0.3	1	100	300	0	Pleiotropy	BayesC	0.46 (0.42, 0.50)	0.72 (0.71, 0.74)	0.51 (0.48, 0.54)	0.97 (0.97, 0.98)	0.74 (0.73, 0.76)
0.3	1	100	300	0	Pleiotropy	RRBLUP	0.40 (0.37, 0.43)	0.72 (0.71, 0.74)	0.47 (0.43, 0.50)	1.00 (1.00, 1.00)	0.72 (0.71, 0.74)
0.3	1	100	300	0.5	Loose Linkage	BayesC	0.45 (0.41, 0.48)	0.70 (0.69, 0.72)	0.46 (0.43, 0.49)	0.99 (0.98, 0.99)	0.91 (0.89, 0.92)
0.3	1	100	300	0.5	Loose Linkage	RRBLUP	0.45 (0.41, 0.48)	0.72 (0.70, 0.73)	0.48 (0.45, 0.51)	1.00 (1.00, 1.00)	0.90 (0.89, 0.91)
0.3	1	100	300	0.5	Tight Linkage	BayesC	0.50 (0.46, 0.53)	0.71 (0.70, 0.73)	0.47 (0.44, 0.50)	0.99 (0.98, 0.99)	0.93 (0.93, 0.94)
0.3	1	100	300	0.5	Tight Linkage	RRBLUP	0.52 (0.49, 0.55)	0.72 (0.71, 0.74)	0.50 (0.47, 0.53)	1.00 (1.00, 1.00)	0.93 (0.92, 0.94)
0.3	1	100	300	0.5	Pleiotropy	BayesC	0.40 (0.37, 0.44)	0.72 (0.70, 0.74)	0.52 (0.49, 0.56)	0.97 (0.97, 0.98)	0.74 (0.72, 0.76)
0.3	1	100	300	0.5	Pleiotropy	RRBLUP	0.36 (0.33, 0.40)	0.72 (0.71, 0.74)	0.47 (0.43, 0.50)	1.00 (1.00, 1.00)	0.70 (0.68, 0.72)
0.3	1	100	450	-0.5	Loose Linkage	BayesC	0.52 (0.49, 0.55)	0.75 (0.73, 0.77)	0.50 (0.47, 0.54)	0.99 (0.98, 0.99)	0.92 (0.91, 0.93)
0.3	1	100	450	-0.5	Loose Linkage	RRBLUP	0.51 (0.48, 0.53)	0.75 (0.73, 0.76)	0.51 (0.48, 0.54)	1.00 (1.00, 1.00)	0.92 (0.91, 0.93)
0.3	1	100	450	-0.5	Tight Linkage	BayesC	0.56 (0.53, 0.60)	0.73 (0.71, 0.75)	0.49 (0.46, 0.52)	0.99 (0.99, 0.99)	0.95 (0.94, 0.96)
0.3	1	100	450	-0.5	Tight Linkage	RRBLUP	0.59 (0.56, 0.62)	0.74 (0.73, 0.76)	0.52 (0.50, 0.55)	1.00 (1.00, 1.00)	0.95 (0.94, 0.96)
0.3	1	100	450	-0.5	Pleiotropy	BayesC	0.44 (0.41, 0.47)	0.74 (0.73, 0.76)	0.52 (0.50, 0.55)	0.97 (0.97, 0.97)	0.79 (0.77, 0.81)
0.3	1	100	450	-0.5	Pleiotropy	RRBLUP	0.43 (0.40, 0.46)	0.73 (0.71, 0.75)	0.51 (0.48, 0.54)	1.00 (1.00, 1.00)	0.78 (0.76, 0.80)
0.3	1	100	450	0	Loose Linkage	BayesC	0.52 (0.49, 0.54)	0.73 (0.71, 0.75)	0.52 (0.49, 0.55)	0.99 (0.99, 0.99)	0.92 (0.91, 0.93)
0.3	1	100	450	0	Loose Linkage	RRBLUP	0.54 (0.51, 0.57)	0.75 (0.74, 0.77)	0.52 (0.48, 0.55)	1.00 (1.00, 1.00)	0.92 (0.91, 0.93)
0.3	1	100	450	0	Tight Linkage	BayesC	0.57 (0.54, 0.60)	0.74 (0.72, 0.76)	0.50 (0.47, 0.53)	0.99 (0.99, 0.99)	0.95 (0.94, 0.95)
0.3	1	100	450	0	Tight Linkage	RRBLUP	0.58 (0.54, 0.61)	0.74 (0.72, 0.75)	0.52 (0.49, 0.55)	1.00 (1.00, 1.00)	0.94 (0.93, 0.95)
0.3	1	100	450	0	Pleiotropy	BayesC	0.48 (0.46, 0.51)	0.74 (0.73, 0.76)	0.51 (0.49, 0.54)	0.97 (0.97, 0.97)	0.79 (0.77, 0.80)
0.3	1	100	450	0	Pleiotropy	RRBLUP	0.47 (0.44, 0.50)	0.75 (0.73, 0.76)	0.52 (0.49, 0.55)	1.00 (1.00, 1.00)	0.76 (0.75, 0.78)
0.3	1	100	450	0.5	Loose Linkage	BayesC	0.52 (0.49, 0.55)	0.74 (0.72, 0.76)	0.53 (0.50, 0.55)	0.99 (0.98, 0.99)	0.92 (0.91, 0.93)
0.3	1	100	450	0.5	Loose Linkage	RRBLUP	0.51 (0.48, 0.54)	0.74 (0.73, 0.76)	0.51 (0.48, 0.54)	1.00 (1.00, 1.00)	0.92 (0.91, 0.93)
0.3	1	100	450	0.5	Tight Linkage	BayesC	0.56 (0.52, 0.59)	0.73 (0.72, 0.75)	0.50 (0.47, 0.53)	0.99 (0.98, 0.99)	0.95 (0.94, 0.95)
0.3	1	100	450	0.5	Tight Linkage	RRBLUP	0.54 (0.51, 0.57)	0.74 (0.72, 0.75)	0.52 (0.49, 0.55)	1.00 (1.00, 1.00)	0.94 (0.93, 0.95)
0.3	1	100	450	0.5	Pleiotropy	BayesC	0.45 (0.42, 0.48)	0.75 (0.74, 0.77)	0.54 (0.51, 0.57)	0.97 (0.96, 0.97)	0.79 (0.78, 0.81)
0.3	1	100	450	0.5	Pleiotropy	RRBLUP	0.46 (0.43, 0.50)	0.75 (0.73, 0.77)	0.53 (0.50, 0.56)	1.00 (1.00, 1.00)	0.77 (0.75, 0.79)
0.3	1	100	600	-0.5	Loose Linkage	BayesC	0.54 (0.51, 0.57)	0.75 (0.74, 0.77)	0.55 (0.52, 0.58)	0.99 (0.99, 0.99)	0.93 (0.92, 0.94)
0.3	1	100	600	-0.5	Loose Linkage	RRBLUP	0.55 (0.52, 0.58)	0.76 (0.75, 0.78)	0.55 (0.52, 0.57)	1.00 (1.00, 1.00)	0.93 (0.92, 0.94)
0.3	1	100	600	-0.5	Tight Linkage	BayesC	0.58 (0.55, 0.61)	0.75 (0.73, 0.76)	0.54 (0.51, 0.57)	0.99 (0.99, 0.99)	0.95 (0.94, 0.96)
0.3	1	100	600	-0.5	Tight Linkage	RRBLUP	0.60 (0.57, 0.63)	0.77 (0.76, 0.79)	0.53 (0.50, 0.56)	1.00 (1.00, 1.00)	0.95 (0.95, 0.96)
0.3	1	100	600	-0.5	Pleiotropy	BayesC	0.50 (0.47, 0.53)	0.79 (0.77, 0.80)	0.59 (0.56, 0.61)	0.97 (0.96, 0.97)	0.83 (0.82, 0.85)
0.3	1	100	600	-0.5	Pleiotropy	RRBLUP	0.48 (0.44, 0.51)	0.76 (0.75, 0.78)	0.52 (0.49, 0.55)	0.99 (0.99, 1.00)	0.79 (0.78, 0.81)
0.3	1	100	600	0	Loose Linkage	BayesC	0.54 (0.51, 0.57)	0.76 (0.74, 0.77)	0.56 (0.53, 0.59)	0.99 (0.99, 0.99)	0.93 (0.92, 0.94)
0.3	1	100	600	0	Loose Linkage	RRBLUP	0.54 (0.51, 0.57)	0.77 (0.75, 0.78)	0.54 (0.51, 0.57)	1.00 (1.00, 1.00)	0.93 (0.92, 0.94)
0.3	1	100	600	0	Tight Linkage	BayesC	0.62 (0.59, 0.65)	0.77 (0.75, 0.78)	0.54 (0.52, 0.57)	0.99 (0.99, 0.99)	0.95 (0.95, 0.96)
0.3	1	100	600	0	Tight Linkage	RRBLUP	0.61 (0.58, 0.64)	0.77 (0.75, 0.79)	0.54 (0.51, 0.58)	1.00 (1.00, 1.00)	0.95 (0.94, 0.96)
0.3	1	100	600	0	Pleiotropy	BayesC	0.53 (0.51, 0.56)	0.76 (0.75, 0.77)	0.55 (0.52, 0.57)	0.97 (0.97, 0.97)	0.82 (0.81, 0.84)
0.3	1	100	600	0	Pleiotropy	RRBLUP	0.51 (0.48, 0.54)	0.76 (0.75, 0.78)	0.52 (0.49, 0.55)	0.99 (0.99, 1.00)	0.79 (0.77, 0.80)
0.3	1	100	600	0.5	Loose Linkage	BayesC	0.55 (0.52, 0.57)	0.75 (0.73, 0.76)	0.56 (0.53, 0.59)	0.99 (0.99, 0.99)	0.93 (0.92, 0.94)
0.3	1	100	600	0.5	Loose Linkage	RRBLUP	0.55 (0.52, 0.58)	0.77 (0.75, 0.78)	0.58 (0.55, 0.61)	1.00 (1.00, 1.00)	0.93 (0.92, 0.94)
0.3	1	100	600	0.5	Tight Linkage	BayesC	0.61 (0.59, 0.64)	0.77 (0.75, 0.78)	0.55 (0.52, 0.58)	0.99 (0.99, 0.99)	0.95 (0.94, 0.96)
0.3	1	100	600	0.5	Tight Linkage	RRBLUP	0.58 (0.55, 0.61)	0.76 (0.74, 0.77)	0.54 (0.51, 0.57)	1.00 (1.00, 1.00)	0.94 (0.93, 0.95)
0.3	1	100	600	0.5	Pleiotropy	BayesC	0.48 (0.45, 0.52)	0.76 (0.75, 0.78)	0.56 (0.53, 0.59)	0.96 (0.96, 0.97)	0.81 (0.80, 0.83)
0.3	1	100	600	0.5	Pleiotropy	RRBLUP	0.46 (0.43, 0.50)	0.76 (0.75, 0.78)	0.56 (0.53, 0.59)	0.99 (0.99, 0.99)	0.79 (0.77, 0.80)
0.6	0.3	30	150	-0.5	Loose Linkage	BayesC	0.29 (0.25, 0.33)	0.82 (0.81, 0.84)	0.52 (0.49, 0.55)	0.79 (0.78, 0.81)	0.53 (0.49, 0.57)
0.6	0.3	30	150	-0.5	Loose Linkage	RRBLUP	0.28 (0.25, 0.32)	0.83 (0.82, 0.84)	0.50 (0.47, 0.53)	0.80 (0.78, 0.81)	0.50 (0.47, 0.54)
0.6	0.3	30	150	-0.5	Tight Linkage	BayesC	0.37 (0.33, 0.40)	0.82 (0.81, 0.83)	0.50 (0.47, 0.53)	0.78 (0.76, 0.80)	0.57 (0.53, 0.61)
0.6	0.3	30	150	-0.5	Tight Linkage	RRBLUP	0.34 (0.30, 0.38)	0.83 (0.82, 0.84)	0.44 (0.40, 0.47)	0.78 (0.76, 0.79)	0.53 (0.49, 0.58)
0.6	0.3	30	150	-0.5	Pleiotropy	BayesC	0.26 (0.23, 0.29)	0.83 (0.82, 0.84)	0.52 (0.49, 0.56)	0.69 (0.67, 0.71)	0.41 (0.38, 0.45)
0.6	0.3	30	150	-0.5	Pleiotropy	RRBLUP	0.27 (0.23, 0.30)	0.83 (0.82, 0.84)	0.50 (0.46, 0.53)	0.65 (0.62, 0.67)	0.38 (0.34, 0.43)
0.6	0.3	30	150	0	Loose Linkage	BayesC	0.28 (0.25, 0.32)	0.83 (0.82, 0.84)	0.51 (0.48, 0.54)	0.77 (0.75, 0.79)	0.49 (0.46, 0.53)
0.6	0.3	30	150	0	Loose Linkage	RRBLUP	0.31 (0.28, 0.35)	0.83 (0.82, 0.84)	0.52 (0.48, 0.55)	0.79 (0.77, 0.81)	0.55 (0.51, 0.59)
0.6	0.3	30	150	0	Tight Linkage	BayesC	0.36 (0.32, 0.40)	0.82 (0.81, 0.83)	0.51 (0.48, 0.54)	0.78 (0.77, 0.80)	0.60 (0.56, 0.64)
0.6	0.3	30	150	0	Tight Linkage	RRBLUP	0.36 (0.32, 0.40)	0.81 (0.80, 0.83)	0.50 (0.47, 0.53)	0.79 (0.77, 0.81)	0.59 (0.55, 0.63)
0.6	0.3	30	150	0	Pleiotropy	BayesC	0.27 (0.24, 0.31)	0.82 (0.81, 0.83)	0.50 (0.46, 0.53)	0.66 (0.64, 0.69)	0.39 (0.35, 0.42)
0.6	0.3	30	150	0	Pleiotropy	RRBLUP	0.27 (0.24, 0.31)	0.82 (0.81, 0.83)	0.46 (0.42, 0.49)	0.67 (0.65, 0.69)	0.39 (0.35, 0.42)
0.6	0.3	30	150	0.5	Loose Linkage	BayesC	0.26 (0.22, 0.30)	0.83 (0.81, 0.84)	0.50 (0.47, 0.53)	0.76 (0.74, 0.78)	0.50 (0.47, 0.54)
0.6	0.3	30	150	0.5	Loose Linkage	RRBLUP	0.30 (0.26, 0.34)	0.83 (0.82, 0.84)	0.51 (0.48, 0.54)	0.78 (0.77, 0.80)	0.52 (0.48, 0.56)
0.6	0.3	30	150	0.5	Tight Linkage	BayesC	0.31 (0.28, 0.35)	0.83 (0.82, 0.84)	0.47 (0.43, 0.50)	0.79 (0.78, 0.81)	0.55 (0.51, 0.59)
0.6	0.3	30	150	0.5	Tight Linkage	RRBLUP	0.35 (0.31, 0.39)	0.83 (0.82, 0.84)	0.50 (0.46, 0.53)	0.79 (0.78, 0.81)	0.57 (0.53, 0.61)
0.6	0.3	30	150	0.5	Pleiotropy	BayesC	0.28 (0.24, 0.31)	0.84 (0.83, 0.85)	0.53 (0.50, 0.57)	0.66 (0.64, 0.68)	0.41 (0.37, 0.45)
0.6	0.3	30	150	0.5	Pleiotropy	RRBLUP	0.28 (0.24, 0.32)	0.82 (0.81, 0.83)	0.49 (0.47, 0.52)	0.67 (0.65, 0.70)	0.39 (0.35, 0.43)
0.6	0.3	30	300	-0.5	Loose Linkage	BayesC	0.35 (0.31, 0.39)	0.85 (0.84, 0.86)	0.61 (0.58, 0.64)	0.81 (0.80, 0.83)	0.57 (0.53, 0.60)
0.6	0.3	30	300	-0.5	Loose Linkage	RRBLUP	0.33 (0.30, 0.37)	0.85 (0.84, 0.86)	0.58 (0.55, 0.61)	0.84 (0.83, 0.85)	0.57 (0.54, 0.61)
0.6	0.3	30	300	-0.5	Tight Linkage	BayesC	0.41 (0.37, 0.45)	0.84 (0.83, 0.85)	0.59 (0.56, 0.61)	0.82 (0.80, 0.83)	0.61 (0.57, 0.65)
0.6	0.3	30	300	-0.5	Tight Linkage	RRBLUP	0.39 (0.35, 0.42)	0.85 (0.84, 0.86)	0.57 (0.53, 0.60)	0.84 (0.83, 0.85)	0.62 (0.58, 0.66)
0.6	0.3	30	300	-0.5	Pleiotropy	BayesC	0.35 (0.31, 0.38)	0.85 (0.84, 0.86)	0.59 (0.56, 0.62)	0.72 (0.70, 0.74)	0.48 (0.44, 0.51)
0.6	0.3	30	300	-0.5	Pleiotropy	RRBLUP	0.33 (0.30, 0.37)	0.85 (0.84, 0.86)	0.57 (0.54, 0.60)	0.73 (0.72, 0.75)	0.45 (0.42, 0.49)
0.6	0.3	30	300	0	Loose Linkage	BayesC	0.34 (0.30, 0.38)	0.85 (0.84, 0.86)	0.61 (0.58, 0.63)	0.81 (0.80, 0.83)	0.54 (0.50, 0.58)
0.6	0.3	30	300	0	Loose Linkage	RRBLUP	0.36 (0.32, 0.39)	0.85 (0.83, 0.86)	0.58 (0.55, 0.61)	0.84 (0.82, 0.85)	0.59 (0.56, 0.62)
0.6	0.3	30	300	0	Tight Linkage	BayesC	0.42 (0.38, 0.46)	0.85 (0.85, 0.86)	0.59 (0.56, 0.62)	0.82 (0.81, 0.83)	0.63 (0.59, 0.66)
0.6	0.3	30	300	0	Tight Linkage	RRBLUP	0.43 (0.39, 0.47)	0.85 (0.83, 0.86)	0.57 (0.54, 0.60)	0.83 (0.81, 0.84)	0.66 (0.62, 0.70)
0.6	0.3	30	300	0	Pleiotropy	BayesC	0.37 (0.34, 0.41)	0.86 (0.85, 0.87)	0.61 (0.57, 0.64)	0.72 (0.70, 0.73)	0.46 (0.43, 0.49)
0.6	0.3	30	300	0	Pleiotropy	RRBLUP	0.37 (0.33, 0.40)	0.85 (0.84, 0.86)	0.57 (0.54, 0.60)	0.72 (0.71, 0.74)	0.46 (0.42, 0.49)
0.6	0.3	30	300	0.5	Loose Linkage	BayesC	0.33 (0.29, 0.36)	0.85 (0.84, 0.86)	0.62 (0.59, 0.64)	0.82 (0.81, 0.84)	0.58 (0.54, 0.61)
0.6	0.3	30	300	0.5	Loose Linkage	RRBLUP	0.32 (0.29, 0.36)	0.86 (0.85, 0.87)	0.56 (0.54, 0.59)	0.83 (0.82, 0.85)	0.56 (0.53, 0.59)
0.6	0.3	30	300	0.5	Tight Linkage	BayesC	0.44 (0.41, 0.48)	0.85 (0.84, 0.86)	0.59 (0.55, 0.62)	0.83 (0.81, 0.84)	0.65 (0.62, 0.68)
0.6	0.3	30	300	0.5	Tight Linkage	RRBLUP	0.41 (0.37, 0.44)	0.85 (0.84, 0.86)	0.57 (0.54, 0.61)	0.85 (0.84, 0.86)	0.66 (0.63, 0.69)
0.6	0.3	30	300	0.5	Pleiotropy	BayesC	0.36 (0.32, 0.40)	0.84 (0.83, 0.85)	0.62 (0.59, 0.65)	0.71 (0.69, 0.73)	0.45 (0.41, 0.50)
0.6	0.3	30	300	0.5	Pleiotropy	RRBLUP	0.34 (0.31, 0.38)	0.86 (0.85, 0.86)	0.59 (0.56, 0.62)	0.70 (0.69, 0.72)	0.46 (0.42, 0.49)
0.6	0.3	30	450	-0.5	Loose Linkage	BayesC	0.37 (0.33, 0.41)	0.86 (0.85, 0.87)	0.68 (0.65, 0.71)	0.84 (0.83, 0.86)	0.61 (0.57, 0.64)
0.6	0.3	30	450	-0.5	Loose Linkage	RRBLUP	0.40 (0.36, 0.43)	0.85 (0.84, 0.87)	0.58 (0.56, 0.61)	0.85 (0.84, 0.86)	0.61 (0.58, 0.64)
0.6	0.3	30	450	-0.5	Tight Linkage	BayesC	0.49 (0.45, 0.52)	0.86 (0.85, 0.87)	0.68 (0.66, 0.70)	0.84 (0.82, 0.85)	0.68 (0.65, 0.71)
0.6	0.3	30	450	-0.5	Tight Linkage	RRBLUP	0.45 (0.41, 0.49)	0.85 (0.85, 0.86)	0.57 (0.54, 0.60)	0.85 (0.84, 0.86)	0.62 (0.59, 0.66)
0.6	0.3	30	450	-0.5	Pleiotropy	BayesC	0.43 (0.39, 0.46)	0.86 (0.85, 0.87)	0.67 (0.64, 0.69)	0.76 (0.74, 0.77)	0.50 (0.47, 0.54)
0.6	0.3	30	450	-0.5	Pleiotropy	RRBLUP	0.37 (0.34, 0.41)	0.87 (0.86, 0.88)	0.61 (0.58, 0.64)	0.76 (0.74, 0.77)	0.52 (0.48, 0.55)
0.6	0.3	30	450	0	Loose Linkage	BayesC	0.38 (0.35, 0.41)	0.86 (0.85, 0.87)	0.66 (0.63, 0.69)	0.83 (0.82, 0.84)	0.60 (0.57, 0.63)
0.6	0.3	30	450	0	Loose Linkage	RRBLUP	0.37 (0.34, 0.41)	0.86 (0.85, 0.87)	0.60 (0.58, 0.63)	0.84 (0.82, 0.85)	0.61 (0.58, 0.65)
0.6	0.3	30	450	0	Tight Linkage	BayesC	0.48 (0.44, 0.52)	0.86 (0.86, 0.87)	0.67 (0.64, 0.71)	0.84 (0.83, 0.86)	0.66 (0.63, 0.70)
0.6	0.3	30	450	0	Tight Linkage	RRBLUP	0.47 (0.43, 0.50)	0.86 (0.86, 0.87)	0.59 (0.56, 0.62)	0.85 (0.83, 0.86)	0.65 (0.61, 0.68)
0.6	0.3	30	450	0	Pleiotropy	BayesC	0.45 (0.41, 0.49)	0.85 (0.84, 0.86)	0.65 (0.62, 0.67)	0.75 (0.73, 0.76)	0.53 (0.49, 0.56)
0.6	0.3	30	450	0	Pleiotropy	RRBLUP	0.43 (0.40, 0.46)	0.86 (0.85, 0.87)	0.61 (0.59, 0.64)	0.74 (0.73, 0.76)	0.53 (0.50, 0.56)
0.6	0.3	30	450	0.5	Loose Linkage	BayesC	0.40 (0.37, 0.43)	0.86 (0.85, 0.87)	0.67 (0.64, 0.69)	0.83 (0.81, 0.84)	0.58 (0.55, 0.62)
0.6	0.3	30	450	0.5	Loose Linkage	RRBLUP	0.37 (0.33, 0.40)	0.86 (0.86, 0.87)	0.63 (0.61, 0.66)	0.84 (0.82, 0.85)	0.60 (0.56, 0.63)
0.6	0.3	30	450	0.5	Tight Linkage	BayesC	0.49 (0.45, 0.52)	0.86 (0.85, 0.87)	0.67 (0.65, 0.70)	0.86 (0.85, 0.87)	0.66 (0.63, 0.70)
0.6	0.3	30	450	0.5	Tight Linkage	RRBLUP	0.48 (0.44, 0.52)	0.86 (0.85, 0.87)	0.60 (0.57, 0.63)	0.87 (0.86, 0.88)	0.67 (0.63, 0.70)
0.6	0.3	30	450	0.5	Pleiotropy	BayesC	0.43 (0.39, 0.46)	0.86 (0.86, 0.87)	0.67 (0.64, 0.70)	0.75 (0.74, 0.77)	0.52 (0.48, 0.55)
0.6	0.3	30	450	0.5	Pleiotropy	RRBLUP	0.35 (0.32, 0.39)	0.86 (0.85, 0.87)	0.58 (0.56, 0.61)	0.74 (0.72, 0.75)	0.46 (0.42, 0.49)
0.6	0.3	30	600	-0.5	Loose Linkage	BayesC	0.42 (0.38, 0.46)	0.87 (0.86, 0.88)	0.73 (0.71, 0.76)	0.85 (0.84, 0.86)	0.62 (0.59, 0.65)
0.6	0.3	30	600	-0.5	Loose Linkage	RRBLUP	0.38 (0.35, 0.42)	0.87 (0.86, 0.88)	0.65 (0.62, 0.67)	0.86 (0.85, 0.87)	0.61 (0.58, 0.64)
0.6	0.3	30	600	-0.5	Tight Linkage	BayesC	0.52 (0.49, 0.56)	0.85 (0.84, 0.87)	0.73 (0.70, 0.75)	0.86 (0.85, 0.87)	0.70 (0.67, 0.73)
0.6	0.3	30	600	-0.5	Tight Linkage	RRBLUP	0.51 (0.47, 0.55)	0.86 (0.85, 0.87)	0.64 (0.61, 0.66)	0.86 (0.84, 0.87)	0.68 (0.65, 0.71)
0.6	0.3	30	600	-0.5	Pleiotropy	BayesC	0.47 (0.44, 0.50)	0.86 (0.85, 0.88)	0.69 (0.66, 0.71)	0.78 (0.76, 0.79)	0.56 (0.53, 0.59)
0.6	0.3	30	600	-0.5	Pleiotropy	RRBLUP	0.45 (0.43, 0.48)	0.88 (0.87, 0.89)	0.63 (0.60, 0.65)	0.77 (0.75, 0.78)	0.53 (0.50, 0.56)
0.6	0.3	30	600	0	Loose Linkage	BayesC	0.44 (0.40, 0.48)	0.86 (0.86, 0.87)	0.72 (0.70, 0.75)	0.86 (0.85, 0.87)	0.66 (0.63, 0.69)
0.6	0.3	30	600	0	Loose Linkage	RRBLUP	0.39 (0.35, 0.43)	0.87 (0.87, 0.88)	0.62 (0.59, 0.64)	0.86 (0.85, 0.87)	0.63 (0.60, 0.67)
0.6	0.3	30	600	0	Tight Linkage	BayesC	0.53 (0.50, 0.56)	0.86 (0.85, 0.87)	0.71 (0.69, 0.73)	0.86 (0.85, 0.87)	0.71 (0.67, 0.74)
0.6	0.3	30	600	0	Tight Linkage	RRBLUP	0.51 (0.48, 0.54)	0.87 (0.86, 0.88)	0.63 (0.61, 0.66)	0.87 (0.86, 0.88)	0.68 (0.64, 0.71)
0.6	0.3	30	600	0	Pleiotropy	BayesC	0.52 (0.49, 0.55)	0.87 (0.86, 0.88)	0.71 (0.68, 0.74)	0.77 (0.75, 0.78)	0.55 (0.52, 0.58)
0.6	0.3	30	600	0	Pleiotropy	RRBLUP	0.48 (0.45, 0.50)	0.87 (0.86, 0.88)	0.64 (0.61, 0.66)	0.76 (0.75, 0.78)	0.52 (0.48, 0.55)
0.6	0.3	30	600	0.5	Loose Linkage	BayesC	0.44 (0.41, 0.48)	0.86 (0.85, 0.87)	0.71 (0.68, 0.73)	0.85 (0.84, 0.86)	0.61 (0.58, 0.65)
0.6	0.3	30	600	0.5	Loose Linkage	RRBLUP	0.43 (0.40, 0.47)	0.87 (0.87, 0.88)	0.66 (0.63, 0.68)	0.87 (0.85, 0.88)	0.64 (0.61, 0.67)
0.6	0.3	30	600	0.5	Tight Linkage	BayesC	0.52 (0.49, 0.55)	0.87 (0.86, 0.88)	0.73 (0.71, 0.75)	0.86 (0.85, 0.88)	0.72 (0.69, 0.75)
0.6	0.3	30	600	0.5	Tight Linkage	RRBLUP	0.49 (0.45, 0.52)	0.86 (0.86, 0.87)	0.62 (0.60, 0.65)	0.87 (0.86, 0.88)	0.67 (0.64, 0.71)
0.6	0.3	30	600	0.5	Pleiotropy	BayesC	0.46 (0.43, 0.49)	0.87 (0.86, 0.87)	0.69 (0.66, 0.72)	0.77 (0.76, 0.79)	0.56 (0.53, 0.59)
0.6	0.3	30	600	0.5	Pleiotropy	RRBLUP	0.41 (0.38, 0.44)	0.88 (0.87, 0.89)	0.61 (0.58, 0.64)	0.77 (0.75, 0.78)	0.51 (0.47, 0.55)
0.6	0.3	100	150	-0.5	Loose Linkage	BayesC	0.30 (0.26, 0.33)	0.83 (0.82, 0.84)	0.51 (0.48, 0.54)	0.80 (0.79, 0.82)	0.58 (0.55, 0.61)
0.6	0.3	100	150	-0.5	Loose Linkage	RRBLUP	0.36 (0.33, 0.40)	0.83 (0.82, 0.84)	0.50 (0.47, 0.53)	0.84 (0.83, 0.86)	0.62 (0.58, 0.66)
0.6	0.3	100	150	-0.5	Tight Linkage	BayesC	0.39 (0.35, 0.43)	0.83 (0.82, 0.84)	0.49 (0.45, 0.52)	0.82 (0.80, 0.83)	0.66 (0.63, 0.70)
0.6	0.3	100	150	-0.5	Tight Linkage	RRBLUP	0.39 (0.35, 0.43)	0.82 (0.81, 0.84)	0.51 (0.48, 0.53)	0.85 (0.83, 0.86)	0.68 (0.65, 0.72)
0.6	0.3	100	150	-0.5	Pleiotropy	BayesC	0.27 (0.24, 0.31)	0.82 (0.81, 0.84)	0.53 (0.50, 0.56)	0.67 (0.65, 0.69)	0.45 (0.42, 0.47)
0.6	0.3	100	150	-0.5	Pleiotropy	RRBLUP	0.21 (0.17, 0.25)	0.83 (0.82, 0.84)	0.52 (0.49, 0.55)	0.67 (0.65, 0.69)	0.40 (0.36, 0.43)
0.6	0.3	100	150	0	Loose Linkage	BayesC	0.30 (0.26, 0.34)	0.82 (0.81, 0.83)	0.49 (0.46, 0.53)	0.82 (0.80, 0.83)	0.60 (0.57, 0.64)
0.6	0.3	100	150	0	Loose Linkage	RRBLUP	0.35 (0.31, 0.39)	0.83 (0.82, 0.84)	0.48 (0.45, 0.51)	0.84 (0.82, 0.85)	0.60 (0.57, 0.64)
0.6	0.3	100	150	0	Tight Linkage	BayesC	0.38 (0.34, 0.42)	0.83 (0.82, 0.84)	0.50 (0.47, 0.53)	0.82 (0.81, 0.84)	0.64 (0.61, 0.67)
0.6	0.3	100	150	0	Tight Linkage	RRBLUP	0.40 (0.37, 0.44)	0.82 (0.81, 0.83)	0.47 (0.44, 0.50)	0.85 (0.84, 0.87)	0.66 (0.62, 0.70)
0.6	0.3	100	150	0	Pleiotropy	BayesC	0.26 (0.23, 0.30)	0.82 (0.81, 0.83)	0.50 (0.47, 0.53)	0.65 (0.62, 0.67)	0.42 (0.38, 0.45)
0.6	0.3	100	150	0	Pleiotropy	RRBLUP	0.25 (0.21, 0.29)	0.84 (0.82, 0.85)	0.52 (0.49, 0.55)	0.65 (0.63, 0.68)	0.42 (0.38, 0.46)
0.6	0.3	100	150	0.5	Loose Linkage	BayesC	0.37 (0.33, 0.40)	0.83 (0.81, 0.84)	0.47 (0.44, 0.50)	0.82 (0.80, 0.83)	0.60 (0.56, 0.63)
0.6	0.3	100	150	0.5	Loose Linkage	RRBLUP	0.38 (0.34, 0.41)	0.83 (0.82, 0.84)	0.50 (0.47, 0.53)	0.83 (0.81, 0.85)	0.60 (0.57, 0.64)
0.6	0.3	100	150	0.5	Tight Linkage	BayesC	0.35 (0.31, 0.39)	0.83 (0.82, 0.84)	0.50 (0.47, 0.54)	0.83 (0.81, 0.84)	0.64 (0.61, 0.67)
0.6	0.3	100	150	0.5	Tight Linkage	RRBLUP	0.39 (0.35, 0.42)	0.83 (0.82, 0.84)	0.50 (0.47, 0.53)	0.84 (0.83, 0.86)	0.67 (0.64, 0.70)
0.6	0.3	100	150	0.5	Pleiotropy	BayesC	0.22 (0.19, 0.26)	0.84 (0.82, 0.85)	0.52 (0.49, 0.55)	0.67 (0.65, 0.69)	0.41 (0.37, 0.44)
0.6	0.3	100	150	0.5	Pleiotropy	RRBLUP	0.23 (0.19, 0.26)	0.82 (0.80, 0.84)	0.49 (0.46, 0.53)	0.68 (0.66, 0.70)	0.43 (0.40, 0.46)
0.6	0.3	100	300	-0.5	Loose Linkage	BayesC	0.42 (0.39, 0.45)	0.84 (0.83, 0.85)	0.60 (0.57, 0.63)	0.85 (0.84, 0.87)	0.65 (0.61, 0.68)
0.6	0.3	100	300	-0.5	Loose Linkage	RRBLUP	0.41 (0.38, 0.45)	0.85 (0.84, 0.86)	0.58 (0.55, 0.60)	0.87 (0.86, 0.88)	0.67 (0.64, 0.70)
0.6	0.3	100	300	-0.5	Tight Linkage	BayesC	0.43 (0.40, 0.47)	0.84 (0.83, 0.85)	0.54 (0.51, 0.57)	0.87 (0.86, 0.88)	0.72 (0.69, 0.74)
0.6	0.3	100	300	-0.5	Tight Linkage	RRBLUP	0.50 (0.47, 0.53)	0.84 (0.83, 0.86)	0.56 (0.52, 0.59)	0.88 (0.87, 0.89)	0.74 (0.72, 0.77)
0.6	0.3	100	300	-0.5	Pleiotropy	BayesC	0.31 (0.27, 0.34)	0.84 (0.83, 0.85)	0.56 (0.53, 0.58)	0.71 (0.69, 0.72)	0.45 (0.42, 0.49)
0.6	0.3	100	300	-0.5	Pleiotropy	RRBLUP	0.28 (0.24, 0.31)	0.85 (0.84, 0.86)	0.58 (0.55, 0.60)	0.72 (0.70, 0.74)	0.48 (0.45, 0.51)
0.6	0.3	100	300	0	Loose Linkage	BayesC	0.40 (0.37, 0.43)	0.84 (0.83, 0.85)	0.57 (0.54, 0.60)	0.85 (0.84, 0.86)	0.66 (0.63, 0.69)
0.6	0.3	100	300	0	Loose Linkage	RRBLUP	0.44 (0.40, 0.47)	0.86 (0.85, 0.86)	0.58 (0.55, 0.61)	0.88 (0.86, 0.89)	0.69 (0.66, 0.71)
0.6	0.3	100	300	0	Tight Linkage	BayesC	0.44 (0.41, 0.48)	0.85 (0.84, 0.86)	0.57 (0.54, 0.60)	0.87 (0.86, 0.88)	0.72 (0.69, 0.75)
0.6	0.3	100	300	0	Tight Linkage	RRBLUP	0.49 (0.46, 0.52)	0.85 (0.84, 0.86)	0.58 (0.55, 0.60)	0.88 (0.87, 0.89)	0.72 (0.70, 0.75)
0.6	0.3	100	300	0	Pleiotropy	BayesC	0.33 (0.30, 0.37)	0.85 (0.84, 0.86)	0.60 (0.57, 0.63)	0.71 (0.69, 0.73)	0.47 (0.44, 0.50)
0.6	0.3	100	300	0	Pleiotropy	RRBLUP	0.34 (0.31, 0.37)	0.85 (0.84, 0.86)	0.55 (0.52, 0.58)	0.71 (0.69, 0.73)	0.48 (0.44, 0.51)
0.6	0.3	100	300	0.5	Loose Linkage	BayesC	0.38 (0.35, 0.41)	0.84 (0.83, 0.85)	0.58 (0.56, 0.60)	0.85 (0.84, 0.86)	0.62 (0.59, 0.65)
0.6	0.3	100	300	0.5	Loose Linkage	RRBLUP	0.40 (0.36, 0.43)	0.85 (0.84, 0.86)	0.56 (0.53, 0.59)	0.88 (0.87, 0.89)	0.68 (0.65, 0.71)
0.6	0.3	100	300	0.5	Tight Linkage	BayesC	0.44 (0.41, 0.48)	0.85 (0.84, 0.86)	0.58 (0.55, 0.61)	0.87 (0.86, 0.88)	0.71 (0.69, 0.74)
0.6	0.3	100	300	0.5	Tight Linkage	RRBLUP	0.47 (0.43, 0.51)	0.85 (0.84, 0.86)	0.54 (0.51, 0.57)	0.89 (0.88, 0.90)	0.72 (0.69, 0.75)
0.6	0.3	100	300	0.5	Pleiotropy	BayesC	0.30 (0.27, 0.33)	0.85 (0.84, 0.86)	0.58 (0.56, 0.61)	0.71 (0.69, 0.73)	0.46 (0.42, 0.49)
0.6	0.3	100	300	0.5	Pleiotropy	RRBLUP	0.33 (0.30, 0.37)	0.84 (0.83, 0.85)	0.56 (0.53, 0.59)	0.70 (0.68, 0.71)	0.45 (0.42, 0.49)
0.6	0.3	100	450	-0.5	Loose Linkage	BayesC	0.43 (0.40, 0.46)	0.85 (0.84, 0.86)	0.60 (0.57, 0.62)	0.88 (0.87, 0.89)	0.67 (0.65, 0.70)
0.6	0.3	100	450	-0.5	Loose Linkage	RRBLUP	0.42 (0.39, 0.46)	0.86 (0.86, 0.87)	0.61 (0.59, 0.63)	0.89 (0.88, 0.90)	0.70 (0.67, 0.72)
0.6	0.3	100	450	-0.5	Tight Linkage	BayesC	0.48 (0.44, 0.51)	0.86 (0.85, 0.86)	0.62 (0.60, 0.65)	0.88 (0.88, 0.89)	0.74 (0.71, 0.77)
0.6	0.3	100	450	-0.5	Tight Linkage	RRBLUP	0.49 (0.45, 0.53)	0.86 (0.85, 0.87)	0.63 (0.60, 0.65)	0.90 (0.89, 0.91)	0.77 (0.75, 0.80)
0.6	0.3	100	450	-0.5	Pleiotropy	BayesC	0.38 (0.35, 0.42)	0.86 (0.85, 0.87)	0.63 (0.60, 0.65)	0.74 (0.73, 0.76)	0.51 (0.48, 0.54)
0.6	0.3	100	450	-0.5	Pleiotropy	RRBLUP	0.39 (0.36, 0.42)	0.87 (0.86, 0.88)	0.64 (0.61, 0.66)	0.75 (0.73, 0.77)	0.52 (0.49, 0.55)
0.6	0.3	100	450	0	Loose Linkage	BayesC	0.42 (0.39, 0.45)	0.86 (0.86, 0.87)	0.63 (0.61, 0.65)	0.88 (0.87, 0.89)	0.69 (0.66, 0.72)
0.6	0.3	100	450	0	Loose Linkage	RRBLUP	0.44 (0.41, 0.47)	0.87 (0.86, 0.87)	0.63 (0.61, 0.66)	0.89 (0.88, 0.90)	0.71 (0.68, 0.73)
0.6	0.3	100	450	0	Tight Linkage	BayesC	0.50 (0.47, 0.53)	0.86 (0.85, 0.87)	0.63 (0.60, 0.66)	0.89 (0.88, 0.90)	0.74 (0.71, 0.77)
0.6	0.3	100	450	0	Tight Linkage	RRBLUP	0.53 (0.50, 0.56)	0.86 (0.85, 0.87)	0.62 (0.59, 0.64)	0.90 (0.89, 0.91)	0.76 (0.73, 0.78)
0.6	0.3	100	450	0	Pleiotropy	BayesC	0.38 (0.35, 0.41)	0.86 (0.85, 0.87)	0.63 (0.61, 0.66)	0.75 (0.73, 0.76)	0.54 (0.51, 0.56)
0.6	0.3	100	450	0	Pleiotropy	RRBLUP	0.40 (0.37, 0.43)	0.86 (0.85, 0.87)	0.62 (0.60, 0.65)	0.74 (0.73, 0.76)	0.50 (0.47, 0.53)
0.6	0.3	100	450	0.5	Loose Linkage	BayesC	0.41 (0.38, 0.44)	0.86 (0.86, 0.87)	0.61 (0.58, 0.63)	0.88 (0.88, 0.89)	0.69 (0.66, 0.71)
0.6	0.3	100	450	0.5	Loose Linkage	RRBLUP	0.45 (0.42, 0.49)	0.86 (0.85, 0.87)	0.64 (0.62, 0.66)	0.90 (0.89, 0.91)	0.69 (0.66, 0.73)
0.6	0.3	100	450	0.5	Tight Linkage	BayesC	0.50 (0.46, 0.53)	0.86 (0.85, 0.87)	0.61 (0.58, 0.64)	0.89 (0.88, 0.90)	0.74 (0.71, 0.77)
0.6	0.3	100	450	0.5	Tight Linkage	RRBLUP	0.54 (0.51, 0.56)	0.86 (0.86, 0.87)	0.61 (0.59, 0.64)	0.90 (0.89, 0.91)	0.76 (0.73, 0.79)
0.6	0.3	100	450	0.5	Pleiotropy	BayesC	0.38 (0.35, 0.41)	0.86 (0.85, 0.87)	0.63 (0.60, 0.65)	0.74 (0.73, 0.76)	0.51 (0.47, 0.54)
0.6	0.3	100	450	0.5	Pleiotropy	RRBLUP	0.36 (0.33, 0.39)	0.86 (0.85, 0.86)	0.60 (0.57, 0.62)	0.75 (0.74, 0.77)	0.51 (0.48, 0.55)
0.6	0.3	100	600	-0.5	Loose Linkage	BayesC	0.46 (0.43, 0.49)	0.86 (0.85, 0.87)	0.66 (0.64, 0.68)	0.90 (0.89, 0.90)	0.71 (0.68, 0.74)
0.6	0.3	100	600	-0.5	Loose Linkage	RRBLUP	0.46 (0.43, 0.49)	0.87 (0.86, 0.88)	0.65 (0.62, 0.67)	0.90 (0.89, 0.91)	0.70 (0.67, 0.73)
0.6	0.3	100	600	-0.5	Tight Linkage	BayesC	0.52 (0.49, 0.55)	0.87 (0.86, 0.87)	0.65 (0.63, 0.67)	0.89 (0.88, 0.90)	0.75 (0.72, 0.78)
0.6	0.3	100	600	-0.5	Tight Linkage	RRBLUP	0.56 (0.53, 0.59)	0.87 (0.86, 0.88)	0.63 (0.60, 0.65)	0.91 (0.91, 0.92)	0.76 (0.74, 0.79)
0.6	0.3	100	600	-0.5	Pleiotropy	BayesC	0.41 (0.37, 0.44)	0.87 (0.86, 0.88)	0.67 (0.65, 0.69)	0.77 (0.75, 0.78)	0.54 (0.51, 0.57)
0.6	0.3	100	600	-0.5	Pleiotropy	RRBLUP	0.41 (0.37, 0.44)	0.86 (0.86, 0.87)	0.63 (0.61, 0.66)	0.75 (0.74, 0.77)	0.53 (0.50, 0.56)
0.6	0.3	100	600	0	Loose Linkage	BayesC	0.47 (0.44, 0.50)	0.87 (0.86, 0.88)	0.64 (0.62, 0.67)	0.89 (0.88, 0.90)	0.71 (0.68, 0.74)
0.6	0.3	100	600	0	Loose Linkage	RRBLUP	0.49 (0.46, 0.52)	0.87 (0.86, 0.88)	0.66 (0.63, 0.68)	0.90 (0.89, 0.91)	0.71 (0.68, 0.74)
0.6	0.3	100	600	0	Tight Linkage	BayesC	0.53 (0.50, 0.57)	0.87 (0.86, 0.88)	0.63 (0.61, 0.66)	0.91 (0.90, 0.91)	0.76 (0.74, 0.78)
0.6	0.3	100	600	0	Tight Linkage	RRBLUP	0.54 (0.50, 0.57)	0.87 (0.86, 0.88)	0.64 (0.61, 0.66)	0.91 (0.90, 0.92)	0.78 (0.76, 0.81)
0.6	0.3	100	600	0	Pleiotropy	BayesC	0.48 (0.45, 0.51)	0.87 (0.87, 0.88)	0.65 (0.62, 0.67)	0.76 (0.75, 0.78)	0.55 (0.52, 0.58)
0.6	0.3	100	600	0	Pleiotropy	RRBLUP	0.43 (0.40, 0.46)	0.87 (0.86, 0.88)	0.65 (0.63, 0.67)	0.76 (0.74, 0.78)	0.54 (0.51, 0.57)
0.6	0.3	100	600	0.5	Loose Linkage	BayesC	0.46 (0.42, 0.49)	0.87 (0.86, 0.88)	0.68 (0.65, 0.70)	0.89 (0.88, 0.90)	0.69 (0.67, 0.72)
0.6	0.3	100	600	0.5	Loose Linkage	RRBLUP	0.44 (0.40, 0.47)	0.87 (0.86, 0.88)	0.62 (0.60, 0.65)	0.91 (0.90, 0.92)	0.73 (0.71, 0.76)
0.6	0.3	100	600	0.5	Tight Linkage	BayesC	0.51 (0.47, 0.54)	0.87 (0.86, 0.87)	0.65 (0.63, 0.68)	0.90 (0.89, 0.91)	0.76 (0.73, 0.79)
0.6	0.3	100	600	0.5	Tight Linkage	RRBLUP	0.54 (0.51, 0.57)	0.87 (0.86, 0.88)	0.66 (0.64, 0.69)	0.91 (0.90, 0.92)	0.78 (0.76, 0.81)
0.6	0.3	100	600	0.5	Pleiotropy	BayesC	0.43 (0.40, 0.47)	0.87 (0.86, 0.88)	0.65 (0.63, 0.68)	0.75 (0.73, 0.76)	0.55 (0.53, 0.58)
0.6	0.3	100	600	0.5	Pleiotropy	RRBLUP	0.41 (0.37, 0.44)	0.87 (0.87, 0.88)	0.66 (0.64, 0.68)	0.76 (0.74, 0.77)	0.52 (0.49, 0.55)
0.6	0.6	30	150	-0.5	Loose Linkage	BayesC	0.34 (0.30, 0.38)	0.82 (0.81, 0.83)	0.52 (0.49, 0.56)	0.88 (0.87, 0.89)	0.63 (0.60, 0.66)
0.6	0.6	30	150	-0.5	Loose Linkage	RRBLUP	0.33 (0.30, 0.37)	0.83 (0.82, 0.84)	0.50 (0.47, 0.53)	0.88 (0.87, 0.89)	0.60 (0.58, 0.63)
0.6	0.6	30	150	-0.5	Tight Linkage	BayesC	0.40 (0.35, 0.44)	0.82 (0.81, 0.83)	0.48 (0.44, 0.51)	0.88 (0.87, 0.89)	0.69 (0.66, 0.72)
0.6	0.6	30	150	-0.5	Tight Linkage	RRBLUP	0.41 (0.37, 0.45)	0.83 (0.82, 0.84)	0.48 (0.44, 0.51)	0.88 (0.88, 0.89)	0.68 (0.65, 0.71)
0.6	0.6	30	150	-0.5	Pleiotropy	BayesC	0.36 (0.33, 0.40)	0.83 (0.82, 0.85)	0.52 (0.48, 0.55)	0.83 (0.82, 0.84)	0.49 (0.45, 0.52)
0.6	0.6	30	150	-0.5	Pleiotropy	RRBLUP	0.35 (0.32, 0.39)	0.83 (0.82, 0.84)	0.49 (0.45, 0.52)	0.82 (0.81, 0.83)	0.48 (0.45, 0.51)
0.6	0.6	30	150	0	Loose Linkage	BayesC	0.35 (0.31, 0.38)	0.82 (0.81, 0.83)	0.51 (0.47, 0.55)	0.88 (0.87, 0.89)	0.65 (0.62, 0.68)
0.6	0.6	30	150	0	Loose Linkage	RRBLUP	0.38 (0.34, 0.41)	0.83 (0.82, 0.84)	0.48 (0.45, 0.51)	0.88 (0.87, 0.89)	0.64 (0.61, 0.67)
0.6	0.6	30	150	0	Tight Linkage	BayesC	0.41 (0.37, 0.44)	0.83 (0.81, 0.84)	0.50 (0.46, 0.53)	0.88 (0.87, 0.89)	0.67 (0.63, 0.72)
0.6	0.6	30	150	0	Tight Linkage	RRBLUP	0.41 (0.38, 0.45)	0.82 (0.81, 0.84)	0.50 (0.47, 0.53)	0.88 (0.87, 0.89)	0.68 (0.64, 0.71)
0.6	0.6	30	150	0	Pleiotropy	BayesC	0.35 (0.32, 0.39)	0.82 (0.81, 0.83)	0.51 (0.48, 0.54)	0.83 (0.82, 0.84)	0.53 (0.49, 0.56)
0.6	0.6	30	150	0	Pleiotropy	RRBLUP	0.36 (0.33, 0.40)	0.83 (0.82, 0.84)	0.50 (0.46, 0.53)	0.82 (0.81, 0.83)	0.50 (0.46, 0.54)
0.6	0.6	30	150	0.5	Loose Linkage	BayesC	0.34 (0.30, 0.38)	0.82 (0.81, 0.84)	0.50 (0.47, 0.53)	0.87 (0.86, 0.88)	0.64 (0.60, 0.67)
0.6	0.6	30	150	0.5	Loose Linkage	RRBLUP	0.33 (0.30, 0.37)	0.83 (0.82, 0.84)	0.47 (0.44, 0.51)	0.87 (0.86, 0.88)	0.62 (0.59, 0.65)
0.6	0.6	30	150	0.5	Tight Linkage	BayesC	0.41 (0.37, 0.45)	0.82 (0.81, 0.84)	0.51 (0.48, 0.54)	0.89 (0.88, 0.90)	0.69 (0.65, 0.72)
0.6	0.6	30	150	0.5	Tight Linkage	RRBLUP	0.37 (0.33, 0.41)	0.82 (0.81, 0.83)	0.46 (0.43, 0.49)	0.88 (0.87, 0.89)	0.66 (0.63, 0.69)
0.6	0.6	30	150	0.5	Pleiotropy	BayesC	0.35 (0.32, 0.38)	0.82 (0.81, 0.84)	0.50 (0.46, 0.54)	0.84 (0.83, 0.85)	0.52 (0.48, 0.55)
0.6	0.6	30	150	0.5	Pleiotropy	RRBLUP	0.33 (0.30, 0.36)	0.83 (0.82, 0.84)	0.49 (0.46, 0.52)	0.83 (0.82, 0.85)	0.50 (0.47, 0.54)
0.6	0.6	30	300	-0.5	Loose Linkage	BayesC	0.41 (0.37, 0.44)	0.85 (0.84, 0.86)	0.61 (0.58, 0.64)	0.90 (0.89, 0.90)	0.69 (0.66, 0.72)
0.6	0.6	30	300	-0.5	Loose Linkage	RRBLUP	0.40 (0.36, 0.44)	0.86 (0.85, 0.86)	0.58 (0.55, 0.61)	0.91 (0.90, 0.91)	0.67 (0.64, 0.70)
0.6	0.6	30	300	-0.5	Tight Linkage	BayesC	0.50 (0.46, 0.53)	0.85 (0.84, 0.86)	0.59 (0.56, 0.62)	0.91 (0.90, 0.91)	0.71 (0.68, 0.75)
0.6	0.6	30	300	-0.5	Tight Linkage	RRBLUP	0.45 (0.41, 0.49)	0.84 (0.83, 0.85)	0.57 (0.54, 0.60)	0.91 (0.90, 0.91)	0.73 (0.70, 0.77)
0.6	0.6	30	300	-0.5	Pleiotropy	BayesC	0.46 (0.43, 0.49)	0.85 (0.84, 0.86)	0.59 (0.55, 0.63)	0.84 (0.84, 0.85)	0.59 (0.56, 0.62)
0.6	0.6	30	300	-0.5	Pleiotropy	RRBLUP	0.42 (0.38, 0.45)	0.84 (0.83, 0.86)	0.57 (0.54, 0.60)	0.85 (0.84, 0.86)	0.57 (0.55, 0.60)
0.6	0.6	30	300	0	Loose Linkage	BayesC	0.39 (0.36, 0.42)	0.84 (0.83, 0.85)	0.59 (0.56, 0.63)	0.90 (0.90, 0.91)	0.71 (0.68, 0.73)
0.6	0.6	30	300	0	Loose Linkage	RRBLUP	0.39 (0.36, 0.43)	0.86 (0.85, 0.87)	0.57 (0.54, 0.60)	0.89 (0.89, 0.90)	0.66 (0.63, 0.69)
0.6	0.6	30	300	0	Tight Linkage	BayesC	0.52 (0.48, 0.56)	0.85 (0.84, 0.86)	0.59 (0.56, 0.62)	0.90 (0.89, 0.91)	0.78 (0.75, 0.80)
0.6	0.6	30	300	0	Tight Linkage	RRBLUP	0.50 (0.46, 0.53)	0.85 (0.84, 0.86)	0.56 (0.52, 0.59)	0.90 (0.89, 0.91)	0.72 (0.69, 0.75)
0.6	0.6	30	300	0	Pleiotropy	BayesC	0.48 (0.45, 0.51)	0.84 (0.83, 0.85)	0.61 (0.58, 0.64)	0.85 (0.84, 0.86)	0.60 (0.57, 0.63)
0.6	0.6	30	300	0	Pleiotropy	RRBLUP	0.44 (0.40, 0.47)	0.85 (0.85, 0.86)	0.56 (0.53, 0.59)	0.85 (0.84, 0.86)	0.55 (0.52, 0.58)
0.6	0.6	30	300	0.5	Loose Linkage	BayesC	0.41 (0.38, 0.44)	0.84 (0.83, 0.85)	0.57 (0.54, 0.59)	0.90 (0.89, 0.91)	0.68 (0.65, 0.70)
0.6	0.6	30	300	0.5	Loose Linkage	RRBLUP	0.37 (0.34, 0.41)	0.85 (0.84, 0.86)	0.55 (0.52, 0.58)	0.90 (0.89, 0.91)	0.66 (0.62, 0.69)
0.6	0.6	30	300	0.5	Tight Linkage	BayesC	0.46 (0.43, 0.50)	0.85 (0.83, 0.86)	0.57 (0.54, 0.60)	0.90 (0.90, 0.91)	0.73 (0.69, 0.76)
0.6	0.6	30	300	0.5	Tight Linkage	RRBLUP	0.48 (0.45, 0.51)	0.84 (0.83, 0.85)	0.53 (0.50, 0.56)	0.90 (0.89, 0.91)	0.69 (0.66, 0.73)
0.6	0.6	30	300	0.5	Pleiotropy	BayesC	0.42 (0.38, 0.45)	0.84 (0.83, 0.85)	0.60 (0.57, 0.63)	0.84 (0.83, 0.85)	0.60 (0.57, 0.63)
0.6	0.6	30	300	0.5	Pleiotropy	RRBLUP	0.36 (0.32, 0.39)	0.84 (0.83, 0.85)	0.54 (0.51, 0.58)	0.85 (0.84, 0.86)	0.58 (0.54, 0.61)
0.6	0.6	30	450	-0.5	Loose Linkage	BayesC	0.45 (0.42, 0.48)	0.86 (0.85, 0.87)	0.64 (0.62, 0.67)	0.91 (0.90, 0.92)	0.75 (0.72, 0.78)
0.6	0.6	30	450	-0.5	Loose Linkage	RRBLUP	0.45 (0.41, 0.48)	0.86 (0.85, 0.87)	0.62 (0.59, 0.64)	0.90 (0.90, 0.91)	0.70 (0.67, 0.73)
0.6	0.6	30	450	-0.5	Tight Linkage	BayesC	0.56 (0.53, 0.59)	0.87 (0.86, 0.88)	0.66 (0.64, 0.69)	0.92 (0.91, 0.93)	0.79 (0.76, 0.81)
0.6	0.6	30	450	-0.5	Tight Linkage	RRBLUP	0.52 (0.48, 0.56)	0.86 (0.85, 0.87)	0.62 (0.59, 0.65)	0.92 (0.91, 0.92)	0.74 (0.71, 0.77)
0.6	0.6	30	450	-0.5	Pleiotropy	BayesC	0.50 (0.47, 0.53)	0.87 (0.86, 0.87)	0.67 (0.64, 0.69)	0.86 (0.85, 0.87)	0.67 (0.64, 0.69)
0.6	0.6	30	450	-0.5	Pleiotropy	RRBLUP	0.49 (0.46, 0.52)	0.86 (0.86, 0.87)	0.60 (0.57, 0.63)	0.86 (0.85, 0.87)	0.63 (0.60, 0.66)
0.6	0.6	30	450	0	Loose Linkage	BayesC	0.47 (0.44, 0.51)	0.86 (0.85, 0.87)	0.66 (0.63, 0.69)	0.91 (0.90, 0.92)	0.74 (0.72, 0.77)
0.6	0.6	30	450	0	Loose Linkage	RRBLUP	0.44 (0.40, 0.48)	0.85 (0.84, 0.86)	0.59 (0.56, 0.62)	0.91 (0.91, 0.92)	0.72 (0.70, 0.75)
0.6	0.6	30	450	0	Tight Linkage	BayesC	0.55 (0.52, 0.59)	0.86 (0.85, 0.87)	0.70 (0.67, 0.72)	0.91 (0.91, 0.92)	0.80 (0.78, 0.83)
0.6	0.6	30	450	0	Tight Linkage	RRBLUP	0.54 (0.51, 0.57)	0.87 (0.86, 0.87)	0.62 (0.59, 0.65)	0.92 (0.91, 0.92)	0.74 (0.70, 0.77)
0.6	0.6	30	450	0	Pleiotropy	BayesC	0.55 (0.51, 0.58)	0.86 (0.85, 0.87)	0.65 (0.62, 0.68)	0.86 (0.85, 0.87)	0.67 (0.64, 0.69)
0.6	0.6	30	450	0	Pleiotropy	RRBLUP	0.51 (0.48, 0.54)	0.86 (0.85, 0.87)	0.60 (0.57, 0.64)	0.86 (0.85, 0.87)	0.62 (0.59, 0.64)
0.6	0.6	30	450	0.5	Loose Linkage	BayesC	0.48 (0.45, 0.52)	0.87 (0.86, 0.88)	0.65 (0.63, 0.68)	0.91 (0.90, 0.92)	0.73 (0.71, 0.76)
0.6	0.6	30	450	0.5	Loose Linkage	RRBLUP	0.43 (0.39, 0.46)	0.85 (0.84, 0.86)	0.59 (0.57, 0.62)	0.91 (0.90, 0.92)	0.70 (0.67, 0.73)
0.6	0.6	30	450	0.5	Tight Linkage	BayesC	0.53 (0.50, 0.57)	0.86 (0.85, 0.87)	0.67 (0.64, 0.69)	0.91 (0.91, 0.92)	0.78 (0.76, 0.81)
0.6	0.6	30	450	0.5	Tight Linkage	RRBLUP	0.52 (0.48, 0.56)	0.86 (0.85, 0.87)	0.62 (0.59, 0.65)	0.92 (0.91, 0.93)	0.76 (0.74, 0.79)
0.6	0.6	30	450	0.5	Pleiotropy	BayesC	0.51 (0.48, 0.54)	0.86 (0.85, 0.87)	0.66 (0.63, 0.69)	0.86 (0.85, 0.87)	0.67 (0.64, 0.70)
0.6	0.6	30	450	0.5	Pleiotropy	RRBLUP	0.46 (0.42, 0.49)	0.86 (0.85, 0.87)	0.60 (0.58, 0.63)	0.86 (0.85, 0.87)	0.59 (0.56, 0.62)
0.6	0.6	30	600	-0.5	Loose Linkage	BayesC	0.48 (0.44, 0.52)	0.86 (0.85, 0.87)	0.69 (0.67, 0.72)	0.92 (0.91, 0.92)	0.79 (0.76, 0.81)
0.6	0.6	30	600	-0.5	Loose Linkage	RRBLUP	0.47 (0.44, 0.51)	0.87 (0.86, 0.88)	0.64 (0.61, 0.66)	0.92 (0.91, 0.92)	0.72 (0.69, 0.75)
0.6	0.6	30	600	-0.5	Tight Linkage	BayesC	0.61 (0.57, 0.64)	0.86 (0.85, 0.87)	0.70 (0.68, 0.72)	0.92 (0.91, 0.92)	0.81 (0.79, 0.83)
0.6	0.6	30	600	-0.5	Tight Linkage	RRBLUP	0.56 (0.52, 0.59)	0.87 (0.86, 0.88)	0.65 (0.63, 0.67)	0.92 (0.91, 0.92)	0.74 (0.71, 0.77)
0.6	0.6	30	600	-0.5	Pleiotropy	BayesC	0.57 (0.54, 0.60)	0.86 (0.85, 0.87)	0.73 (0.71, 0.75)	0.86 (0.85, 0.87)	0.74 (0.72, 0.77)
0.6	0.6	30	600	-0.5	Pleiotropy	RRBLUP	0.52 (0.49, 0.55)	0.86 (0.86, 0.87)	0.64 (0.61, 0.67)	0.87 (0.87, 0.88)	0.66 (0.64, 0.69)
0.6	0.6	30	600	0	Loose Linkage	BayesC	0.53 (0.50, 0.57)	0.87 (0.86, 0.88)	0.72 (0.70, 0.74)	0.91 (0.91, 0.92)	0.78 (0.75, 0.80)
0.6	0.6	30	600	0	Loose Linkage	RRBLUP	0.46 (0.43, 0.50)	0.87 (0.87, 0.88)	0.65 (0.63, 0.68)	0.91 (0.90, 0.91)	0.73 (0.71, 0.76)
0.6	0.6	30	600	0	Tight Linkage	BayesC	0.60 (0.57, 0.64)	0.86 (0.85, 0.87)	0.72 (0.70, 0.74)	0.92 (0.91, 0.92)	0.81 (0.79, 0.83)
0.6	0.6	30	600	0	Tight Linkage	RRBLUP	0.55 (0.52, 0.59)	0.87 (0.86, 0.88)	0.65 (0.63, 0.68)	0.92 (0.91, 0.93)	0.77 (0.75, 0.80)
0.6	0.6	30	600	0	Pleiotropy	BayesC	0.61 (0.58, 0.63)	0.87 (0.86, 0.87)	0.72 (0.70, 0.75)	0.86 (0.85, 0.87)	0.70 (0.67, 0.72)
0.6	0.6	30	600	0	Pleiotropy	RRBLUP	0.53 (0.49, 0.56)	0.87 (0.86, 0.88)	0.61 (0.59, 0.64)	0.87 (0.86, 0.88)	0.65 (0.62, 0.67)
0.6	0.6	30	600	0.5	Loose Linkage	BayesC	0.51 (0.48, 0.54)	0.86 (0.85, 0.87)	0.71 (0.69, 0.74)	0.91 (0.91, 0.92)	0.77 (0.74, 0.79)
0.6	0.6	30	600	0.5	Loose Linkage	RRBLUP	0.45 (0.42, 0.48)	0.87 (0.86, 0.88)	0.63 (0.60, 0.66)	0.91 (0.91, 0.92)	0.71 (0.68, 0.73)
0.6	0.6	30	600	0.5	Tight Linkage	BayesC	0.60 (0.56, 0.64)	0.86 (0.85, 0.87)	0.71 (0.68, 0.73)	0.92 (0.91, 0.93)	0.81 (0.79, 0.83)
0.6	0.6	30	600	0.5	Tight Linkage	RRBLUP	0.55 (0.51, 0.58)	0.86 (0.85, 0.87)	0.61 (0.59, 0.64)	0.92 (0.91, 0.93)	0.75 (0.72, 0.78)
0.6	0.6	30	600	0.5	Pleiotropy	BayesC	0.56 (0.53, 0.58)	0.86 (0.85, 0.87)	0.70 (0.68, 0.72)	0.86 (0.85, 0.87)	0.72 (0.70, 0.75)
0.6	0.6	30	600	0.5	Pleiotropy	RRBLUP	0.50 (0.47, 0.53)	0.87 (0.86, 0.88)	0.64 (0.61, 0.66)	0.87 (0.87, 0.88)	0.64 (0.62, 0.67)
0.6	0.6	100	150	-0.5	Loose Linkage	BayesC	0.41 (0.38, 0.44)	0.83 (0.82, 0.84)	0.53 (0.50, 0.56)	0.90 (0.90, 0.91)	0.70 (0.67, 0.73)
0.6	0.6	100	150	-0.5	Loose Linkage	RRBLUP	0.40 (0.36, 0.43)	0.83 (0.82, 0.84)	0.53 (0.50, 0.56)	0.90 (0.89, 0.91)	0.68 (0.65, 0.71)
0.6	0.6	100	150	-0.5	Tight Linkage	BayesC	0.47 (0.43, 0.51)	0.83 (0.82, 0.84)	0.50 (0.46, 0.53)	0.91 (0.91, 0.92)	0.78 (0.76, 0.81)
0.6	0.6	100	150	-0.5	Tight Linkage	RRBLUP	0.44 (0.41, 0.47)	0.84 (0.83, 0.85)	0.51 (0.48, 0.54)	0.91 (0.90, 0.92)	0.77 (0.75, 0.80)
0.6	0.6	100	150	-0.5	Pleiotropy	BayesC	0.31 (0.27, 0.35)	0.83 (0.82, 0.84)	0.52 (0.49, 0.55)	0.83 (0.81, 0.84)	0.48 (0.45, 0.51)
0.6	0.6	100	150	-0.5	Pleiotropy	RRBLUP	0.32 (0.28, 0.35)	0.82 (0.81, 0.83)	0.51 (0.48, 0.54)	0.83 (0.81, 0.84)	0.48 (0.45, 0.51)
0.6	0.6	100	150	0	Loose Linkage	BayesC	0.38 (0.34, 0.42)	0.82 (0.81, 0.83)	0.50 (0.47, 0.53)	0.91 (0.90, 0.91)	0.70 (0.67, 0.73)
0.6	0.6	100	150	0	Loose Linkage	RRBLUP	0.37 (0.34, 0.40)	0.83 (0.82, 0.84)	0.50 (0.47, 0.53)	0.91 (0.90, 0.91)	0.71 (0.68, 0.74)
0.6	0.6	100	150	0	Tight Linkage	BayesC	0.45 (0.41, 0.49)	0.83 (0.81, 0.84)	0.51 (0.48, 0.54)	0.91 (0.90, 0.92)	0.79 (0.76, 0.82)
0.6	0.6	100	150	0	Tight Linkage	RRBLUP	0.46 (0.42, 0.49)	0.83 (0.82, 0.85)	0.49 (0.46, 0.52)	0.91 (0.90, 0.92)	0.76 (0.74, 0.79)
0.6	0.6	100	150	0	Pleiotropy	BayesC	0.33 (0.30, 0.37)	0.83 (0.82, 0.84)	0.51 (0.47, 0.54)	0.83 (0.82, 0.84)	0.49 (0.46, 0.52)
0.6	0.6	100	150	0	Pleiotropy	RRBLUP	0.31 (0.27, 0.35)	0.84 (0.82, 0.85)	0.52 (0.49, 0.56)	0.82 (0.81, 0.83)	0.50 (0.47, 0.54)
0.6	0.6	100	150	0.5	Loose Linkage	BayesC	0.37 (0.34, 0.40)	0.82 (0.81, 0.83)	0.48 (0.45, 0.52)	0.91 (0.90, 0.91)	0.70 (0.67, 0.73)
0.6	0.6	100	150	0.5	Loose Linkage	RRBLUP	0.41 (0.38, 0.44)	0.82 (0.81, 0.83)	0.51 (0.47, 0.54)	0.91 (0.90, 0.92)	0.71 (0.69, 0.74)
0.6	0.6	100	150	0.5	Tight Linkage	BayesC	0.46 (0.42, 0.50)	0.82 (0.81, 0.83)	0.49 (0.46, 0.52)	0.92 (0.91, 0.92)	0.77 (0.74, 0.79)
0.6	0.6	100	150	0.5	Tight Linkage	RRBLUP	0.45 (0.42, 0.49)	0.83 (0.82, 0.84)	0.49 (0.45, 0.52)	0.91 (0.90, 0.92)	0.76 (0.74, 0.79)
0.6	0.6	100	150	0.5	Pleiotropy	BayesC	0.30 (0.27, 0.33)	0.82 (0.81, 0.83)	0.51 (0.47, 0.54)	0.83 (0.82, 0.84)	0.50 (0.46, 0.53)
0.6	0.6	100	150	0.5	Pleiotropy	RRBLUP	0.27 (0.24, 0.31)	0.82 (0.81, 0.83)	0.53 (0.50, 0.56)	0.84 (0.83, 0.85)	0.48 (0.45, 0.51)
0.6	0.6	100	300	-0.5	Loose Linkage	BayesC	0.43 (0.39, 0.46)	0.85 (0.84, 0.86)	0.59 (0.56, 0.62)	0.93 (0.92, 0.93)	0.76 (0.74, 0.79)
0.6	0.6	100	300	-0.5	Loose Linkage	RRBLUP	0.46 (0.43, 0.50)	0.85 (0.84, 0.86)	0.56 (0.54, 0.59)	0.93 (0.93, 0.94)	0.78 (0.76, 0.80)
0.6	0.6	100	300	-0.5	Tight Linkage	BayesC	0.49 (0.47, 0.52)	0.84 (0.83, 0.85)	0.56 (0.53, 0.59)	0.93 (0.93, 0.94)	0.82 (0.80, 0.84)
0.6	0.6	100	300	-0.5	Tight Linkage	RRBLUP	0.53 (0.50, 0.56)	0.85 (0.84, 0.86)	0.56 (0.53, 0.59)	0.94 (0.93, 0.94)	0.81 (0.79, 0.83)
0.6	0.6	100	300	-0.5	Pleiotropy	BayesC	0.41 (0.37, 0.44)	0.85 (0.84, 0.86)	0.58 (0.55, 0.61)	0.86 (0.85, 0.86)	0.57 (0.55, 0.60)
0.6	0.6	100	300	-0.5	Pleiotropy	RRBLUP	0.41 (0.38, 0.44)	0.85 (0.85, 0.86)	0.56 (0.53, 0.59)	0.85 (0.84, 0.86)	0.58 (0.55, 0.60)
0.6	0.6	100	300	0	Loose Linkage	BayesC	0.49 (0.45, 0.52)	0.85 (0.84, 0.86)	0.59 (0.57, 0.62)	0.93 (0.92, 0.93)	0.77 (0.75, 0.80)
0.6	0.6	100	300	0	Loose Linkage	RRBLUP	0.46 (0.43, 0.50)	0.85 (0.84, 0.86)	0.56 (0.52, 0.59)	0.93 (0.93, 0.94)	0.77 (0.74, 0.79)
0.6	0.6	100	300	0	Tight Linkage	BayesC	0.52 (0.48, 0.55)	0.84 (0.83, 0.85)	0.57 (0.54, 0.60)	0.93 (0.92, 0.94)	0.81 (0.78, 0.83)
0.6	0.6	100	300	0	Tight Linkage	RRBLUP	0.52 (0.49, 0.55)	0.86 (0.85, 0.86)	0.58 (0.55, 0.61)	0.93 (0.92, 0.94)	0.81 (0.79, 0.84)
0.6	0.6	100	300	0	Pleiotropy	BayesC	0.42 (0.39, 0.45)	0.84 (0.83, 0.85)	0.56 (0.54, 0.59)	0.84 (0.83, 0.86)	0.56 (0.52, 0.59)
0.6	0.6	100	300	0	Pleiotropy	RRBLUP	0.45 (0.42, 0.48)	0.85 (0.84, 0.86)	0.58 (0.55, 0.61)	0.85 (0.84, 0.86)	0.59 (0.56, 0.61)
0.6	0.6	100	300	0.5	Loose Linkage	BayesC	0.45 (0.42, 0.48)	0.84 (0.83, 0.85)	0.59 (0.57, 0.62)	0.92 (0.92, 0.93)	0.76 (0.74, 0.78)
0.6	0.6	100	300	0.5	Loose Linkage	RRBLUP	0.45 (0.42, 0.48)	0.86 (0.85, 0.86)	0.57 (0.54, 0.60)	0.93 (0.92, 0.93)	0.75 (0.73, 0.78)
0.6	0.6	100	300	0.5	Tight Linkage	BayesC	0.51 (0.48, 0.55)	0.84 (0.83, 0.85)	0.56 (0.53, 0.59)	0.93 (0.92, 0.93)	0.81 (0.79, 0.83)
0.6	0.6	100	300	0.5	Tight Linkage	RRBLUP	0.54 (0.51, 0.58)	0.85 (0.83, 0.86)	0.54 (0.52, 0.57)	0.93 (0.92, 0.93)	0.82 (0.79, 0.84)
0.6	0.6	100	300	0.5	Pleiotropy	BayesC	0.39 (0.36, 0.42)	0.85 (0.84, 0.86)	0.57 (0.54, 0.60)	0.85 (0.84, 0.86)	0.58 (0.55, 0.61)
0.6	0.6	100	300	0.5	Pleiotropy	RRBLUP	0.39 (0.36, 0.43)	0.86 (0.85, 0.87)	0.56 (0.53, 0.59)	0.85 (0.84, 0.86)	0.59 (0.56, 0.61)
0.6	0.6	100	450	-0.5	Loose Linkage	BayesC	0.50 (0.47, 0.53)	0.86 (0.86, 0.87)	0.63 (0.60, 0.65)	0.93 (0.93, 0.94)	0.78 (0.76, 0.81)
0.6	0.6	100	450	-0.5	Loose Linkage	RRBLUP	0.50 (0.47, 0.53)	0.87 (0.86, 0.88)	0.63 (0.61, 0.66)	0.94 (0.93, 0.94)	0.77 (0.75, 0.79)
0.6	0.6	100	450	-0.5	Tight Linkage	BayesC	0.57 (0.53, 0.60)	0.86 (0.85, 0.86)	0.61 (0.59, 0.64)	0.94 (0.93, 0.95)	0.83 (0.81, 0.85)
0.6	0.6	100	450	-0.5	Tight Linkage	RRBLUP	0.58 (0.55, 0.61)	0.86 (0.85, 0.87)	0.62 (0.59, 0.64)	0.94 (0.93, 0.94)	0.83 (0.81, 0.85)
0.6	0.6	100	450	-0.5	Pleiotropy	BayesC	0.47 (0.44, 0.50)	0.87 (0.86, 0.87)	0.63 (0.60, 0.66)	0.87 (0.86, 0.87)	0.64 (0.61, 0.66)
0.6	0.6	100	450	-0.5	Pleiotropy	RRBLUP	0.46 (0.43, 0.49)	0.87 (0.86, 0.88)	0.62 (0.59, 0.65)	0.87 (0.86, 0.88)	0.63 (0.60, 0.65)
0.6	0.6	100	450	0	Loose Linkage	BayesC	0.52 (0.49, 0.55)	0.86 (0.85, 0.87)	0.62 (0.59, 0.64)	0.94 (0.93, 0.94)	0.79 (0.77, 0.81)
0.6	0.6	100	450	0	Loose Linkage	RRBLUP	0.54 (0.52, 0.57)	0.86 (0.86, 0.87)	0.59 (0.57, 0.62)	0.94 (0.93, 0.94)	0.79 (0.78, 0.81)
0.6	0.6	100	450	0	Tight Linkage	BayesC	0.57 (0.53, 0.60)	0.86 (0.85, 0.87)	0.61 (0.58, 0.64)	0.94 (0.94, 0.95)	0.83 (0.81, 0.85)
0.6	0.6	100	450	0	Tight Linkage	RRBLUP	0.56 (0.52, 0.59)	0.86 (0.85, 0.86)	0.61 (0.58, 0.64)	0.94 (0.93, 0.94)	0.83 (0.81, 0.85)
0.6	0.6	100	450	0	Pleiotropy	BayesC	0.49 (0.46, 0.52)	0.86 (0.86, 0.87)	0.60 (0.58, 0.63)	0.86 (0.85, 0.87)	0.63 (0.61, 0.66)
0.6	0.6	100	450	0	Pleiotropy	RRBLUP	0.48 (0.44, 0.51)	0.86 (0.85, 0.87)	0.60 (0.58, 0.63)	0.86 (0.85, 0.87)	0.62 (0.59, 0.64)
0.6	0.6	100	450	0.5	Loose Linkage	BayesC	0.53 (0.50, 0.56)	0.85 (0.85, 0.86)	0.63 (0.60, 0.66)	0.93 (0.93, 0.94)	0.78 (0.76, 0.80)
0.6	0.6	100	450	0.5	Loose Linkage	RRBLUP	0.51 (0.49, 0.53)	0.86 (0.85, 0.87)	0.59 (0.56, 0.62)	0.94 (0.93, 0.94)	0.79 (0.76, 0.81)
0.6	0.6	100	450	0.5	Tight Linkage	BayesC	0.58 (0.55, 0.60)	0.86 (0.86, 0.87)	0.66 (0.63, 0.68)	0.94 (0.93, 0.95)	0.83 (0.82, 0.85)
0.6	0.6	100	450	0.5	Tight Linkage	RRBLUP	0.58 (0.55, 0.61)	0.86 (0.85, 0.87)	0.58 (0.56, 0.61)	0.94 (0.93, 0.94)	0.82 (0.80, 0.84)
0.6	0.6	100	450	0.5	Pleiotropy	BayesC	0.46 (0.43, 0.49)	0.86 (0.85, 0.87)	0.61 (0.59, 0.64)	0.86 (0.85, 0.87)	0.63 (0.60, 0.65)
0.6	0.6	100	450	0.5	Pleiotropy	RRBLUP	0.46 (0.43, 0.49)	0.87 (0.86, 0.88)	0.62 (0.59, 0.64)	0.86 (0.85, 0.87)	0.61 (0.58, 0.64)
0.6	0.6	100	600	-0.5	Loose Linkage	BayesC	0.54 (0.52, 0.57)	0.87 (0.86, 0.88)	0.67 (0.65, 0.70)	0.94 (0.94, 0.95)	0.80 (0.78, 0.82)
0.6	0.6	100	600	-0.5	Loose Linkage	RRBLUP	0.50 (0.47, 0.53)	0.88 (0.87, 0.88)	0.64 (0.62, 0.67)	0.94 (0.94, 0.95)	0.79 (0.77, 0.81)
0.6	0.6	100	600	-0.5	Tight Linkage	BayesC	0.60 (0.57, 0.63)	0.87 (0.86, 0.88)	0.66 (0.64, 0.68)	0.95 (0.94, 0.95)	0.85 (0.83, 0.87)
0.6	0.6	100	600	-0.5	Tight Linkage	RRBLUP	0.56 (0.53, 0.59)	0.87 (0.86, 0.88)	0.65 (0.62, 0.67)	0.94 (0.94, 0.95)	0.83 (0.80, 0.85)
0.6	0.6	100	600	-0.5	Pleiotropy	BayesC	0.51 (0.48, 0.54)	0.86 (0.85, 0.87)	0.64 (0.62, 0.67)	0.87 (0.86, 0.88)	0.65 (0.63, 0.68)
0.6	0.6	100	600	-0.5	Pleiotropy	RRBLUP	0.48 (0.45, 0.51)	0.88 (0.87, 0.88)	0.62 (0.60, 0.65)	0.87 (0.87, 0.88)	0.64 (0.62, 0.66)
0.6	0.6	100	600	0	Loose Linkage	BayesC	0.53 (0.50, 0.56)	0.88 (0.87, 0.88)	0.65 (0.63, 0.67)	0.94 (0.94, 0.95)	0.81 (0.80, 0.83)
0.6	0.6	100	600	0	Loose Linkage	RRBLUP	0.53 (0.50, 0.56)	0.86 (0.86, 0.87)	0.65 (0.63, 0.67)	0.95 (0.94, 0.95)	0.80 (0.78, 0.82)
0.6	0.6	100	600	0	Tight Linkage	BayesC	0.60 (0.57, 0.62)	0.86 (0.85, 0.87)	0.65 (0.63, 0.67)	0.95 (0.94, 0.95)	0.86 (0.84, 0.88)
0.6	0.6	100	600	0	Tight Linkage	RRBLUP	0.61 (0.58, 0.64)	0.87 (0.86, 0.87)	0.62 (0.60, 0.65)	0.95 (0.94, 0.95)	0.86 (0.84, 0.87)
0.6	0.6	100	600	0	Pleiotropy	BayesC	0.57 (0.54, 0.59)	0.88 (0.87, 0.88)	0.65 (0.63, 0.68)	0.87 (0.87, 0.88)	0.66 (0.64, 0.68)
0.6	0.6	100	600	0	Pleiotropy	RRBLUP	0.52 (0.49, 0.55)	0.88 (0.87, 0.88)	0.67 (0.64, 0.69)	0.87 (0.86, 0.88)	0.65 (0.63, 0.67)
0.6	0.6	100	600	0.5	Loose Linkage	BayesC	0.53 (0.51, 0.56)	0.87 (0.86, 0.88)	0.66 (0.64, 0.68)	0.94 (0.94, 0.95)	0.81 (0.79, 0.83)
0.6	0.6	100	600	0.5	Loose Linkage	RRBLUP	0.54 (0.51, 0.56)	0.87 (0.86, 0.88)	0.64 (0.62, 0.67)	0.94 (0.94, 0.95)	0.79 (0.77, 0.81)
0.6	0.6	100	600	0.5	Tight Linkage	BayesC	0.60 (0.58, 0.63)	0.87 (0.86, 0.87)	0.65 (0.62, 0.67)	0.94 (0.94, 0.95)	0.85 (0.83, 0.86)
0.6	0.6	100	600	0.5	Tight Linkage	RRBLUP	0.59 (0.56, 0.62)	0.87 (0.87, 0.88)	0.67 (0.64, 0.69)	0.95 (0.94, 0.95)	0.84 (0.82, 0.86)
0.6	0.6	100	600	0.5	Pleiotropy	BayesC	0.48 (0.45, 0.51)	0.86 (0.86, 0.87)	0.66 (0.64, 0.68)	0.87 (0.87, 0.88)	0.68 (0.65, 0.70)
0.6	0.6	100	600	0.5	Pleiotropy	RRBLUP	0.48 (0.45, 0.51)	0.87 (0.87, 0.88)	0.64 (0.61, 0.66)	0.87 (0.86, 0.87)	0.65 (0.63, 0.67)
0.6	1	30	150	-0.5	Loose Linkage	BayesC	0.44 (0.40, 0.47)	0.82 (0.81, 0.83)	0.50 (0.47, 0.53)	0.97 (0.97, 0.98)	0.80 (0.78, 0.83)
0.6	1	30	150	-0.5	Loose Linkage	RRBLUP	0.42 (0.39, 0.46)	0.83 (0.82, 0.84)	0.49 (0.46, 0.53)	1.00 (1.00, 1.00)	0.77 (0.74, 0.79)
0.6	1	30	150	-0.5	Tight Linkage	BayesC	0.52 (0.48, 0.56)	0.84 (0.83, 0.85)	0.49 (0.46, 0.53)	0.97 (0.96, 0.97)	0.86 (0.84, 0.87)
0.6	1	30	150	-0.5	Tight Linkage	RRBLUP	0.50 (0.47, 0.54)	0.83 (0.82, 0.84)	0.45 (0.42, 0.49)	1.00 (1.00, 1.00)	0.80 (0.78, 0.83)
0.6	1	30	150	-0.5	Pleiotropy	BayesC	0.40 (0.36, 0.43)	0.83 (0.82, 0.85)	0.48 (0.45, 0.51)	0.97 (0.96, 0.97)	0.67 (0.65, 0.70)
0.6	1	30	150	-0.5	Pleiotropy	RRBLUP	0.40 (0.37, 0.43)	0.83 (0.82, 0.84)	0.50 (0.46, 0.53)	1.00 (1.00, 1.00)	0.63 (0.59, 0.66)
0.6	1	30	150	0	Loose Linkage	BayesC	0.43 (0.39, 0.47)	0.83 (0.82, 0.84)	0.48 (0.45, 0.52)	0.97 (0.97, 0.98)	0.81 (0.79, 0.84)
0.6	1	30	150	0	Loose Linkage	RRBLUP	0.40 (0.37, 0.43)	0.83 (0.81, 0.84)	0.49 (0.45, 0.53)	1.00 (1.00, 1.00)	0.80 (0.78, 0.82)
0.6	1	30	150	0	Tight Linkage	BayesC	0.49 (0.44, 0.53)	0.83 (0.82, 0.84)	0.50 (0.47, 0.54)	0.97 (0.96, 0.97)	0.85 (0.83, 0.88)
0.6	1	30	150	0	Tight Linkage	RRBLUP	0.50 (0.47, 0.54)	0.82 (0.81, 0.84)	0.49 (0.46, 0.52)	1.00 (1.00, 1.00)	0.84 (0.81, 0.86)
0.6	1	30	150	0	Pleiotropy	BayesC	0.45 (0.41, 0.49)	0.83 (0.82, 0.84)	0.51 (0.48, 0.55)	0.97 (0.97, 0.98)	0.65 (0.61, 0.68)
0.6	1	30	150	0	Pleiotropy	RRBLUP	0.44 (0.40, 0.47)	0.83 (0.81, 0.84)	0.49 (0.46, 0.53)	1.00 (1.00, 1.00)	0.63 (0.61, 0.66)
0.6	1	30	150	0.5	Loose Linkage	BayesC	0.38 (0.34, 0.42)	0.83 (0.82, 0.84)	0.47 (0.43, 0.50)	0.98 (0.97, 0.98)	0.80 (0.78, 0.83)
0.6	1	30	150	0.5	Loose Linkage	RRBLUP	0.44 (0.41, 0.48)	0.83 (0.82, 0.84)	0.52 (0.49, 0.55)	1.00 (1.00, 1.00)	0.80 (0.77, 0.82)
0.6	1	30	150	0.5	Tight Linkage	BayesC	0.49 (0.45, 0.53)	0.83 (0.82, 0.84)	0.50 (0.47, 0.53)	0.97 (0.97, 0.98)	0.84 (0.82, 0.87)
0.6	1	30	150	0.5	Tight Linkage	RRBLUP	0.50 (0.47, 0.54)	0.83 (0.82, 0.84)	0.49 (0.46, 0.52)	1.00 (1.00, 1.00)	0.81 (0.79, 0.84)
0.6	1	30	150	0.5	Pleiotropy	BayesC	0.37 (0.33, 0.41)	0.83 (0.82, 0.84)	0.48 (0.44, 0.51)	0.97 (0.96, 0.97)	0.65 (0.62, 0.68)
0.6	1	30	150	0.5	Pleiotropy	RRBLUP	0.40 (0.37, 0.44)	0.82 (0.80, 0.83)	0.49 (0.46, 0.53)	1.00 (1.00, 1.00)	0.64 (0.61, 0.66)
0.6	1	30	300	-0.5	Loose Linkage	BayesC	0.51 (0.48, 0.54)	0.85 (0.84, 0.85)	0.59 (0.56, 0.62)	0.95 (0.95, 0.96)	0.86 (0.85, 0.88)
0.6	1	30	300	-0.5	Loose Linkage	RRBLUP	0.50 (0.46, 0.53)	0.85 (0.85, 0.86)	0.57 (0.55, 0.60)	1.00 (1.00, 1.00)	0.83 (0.81, 0.85)
0.6	1	30	300	-0.5	Tight Linkage	BayesC	0.55 (0.51, 0.59)	0.86 (0.85, 0.86)	0.59 (0.56, 0.62)	0.94 (0.94, 0.95)	0.88 (0.86, 0.89)
0.6	1	30	300	-0.5	Tight Linkage	RRBLUP	0.58 (0.55, 0.62)	0.85 (0.84, 0.86)	0.56 (0.54, 0.59)	1.00 (1.00, 1.00)	0.86 (0.84, 0.88)
0.6	1	30	300	-0.5	Pleiotropy	BayesC	0.53 (0.50, 0.56)	0.84 (0.83, 0.85)	0.57 (0.54, 0.60)	0.93 (0.92, 0.94)	0.80 (0.78, 0.82)
0.6	1	30	300	-0.5	Pleiotropy	RRBLUP	0.50 (0.46, 0.53)	0.85 (0.84, 0.86)	0.57 (0.54, 0.60)	1.00 (1.00, 1.00)	0.72 (0.70, 0.74)
0.6	1	30	300	0	Loose Linkage	BayesC	0.52 (0.48, 0.55)	0.85 (0.84, 0.85)	0.61 (0.58, 0.64)	0.95 (0.94, 0.96)	0.86 (0.85, 0.88)
0.6	1	30	300	0	Loose Linkage	RRBLUP	0.47 (0.44, 0.51)	0.85 (0.84, 0.86)	0.57 (0.54, 0.60)	1.00 (1.00, 1.00)	0.84 (0.83, 0.86)
0.6	1	30	300	0	Tight Linkage	BayesC	0.58 (0.55, 0.62)	0.85 (0.84, 0.86)	0.59 (0.56, 0.62)	0.95 (0.95, 0.96)	0.91 (0.89, 0.92)
0.6	1	30	300	0	Tight Linkage	RRBLUP	0.58 (0.54, 0.61)	0.84 (0.83, 0.86)	0.56 (0.53, 0.60)	1.00 (1.00, 1.00)	0.87 (0.85, 0.89)
0.6	1	30	300	0	Pleiotropy	BayesC	0.57 (0.54, 0.60)	0.86 (0.85, 0.87)	0.60 (0.57, 0.63)	0.93 (0.92, 0.94)	0.78 (0.76, 0.80)
0.6	1	30	300	0	Pleiotropy	RRBLUP	0.55 (0.52, 0.57)	0.85 (0.84, 0.86)	0.57 (0.54, 0.59)	1.00 (1.00, 1.00)	0.74 (0.72, 0.76)
0.6	1	30	300	0.5	Loose Linkage	BayesC	0.50 (0.46, 0.54)	0.85 (0.84, 0.86)	0.58 (0.54, 0.61)	0.95 (0.94, 0.96)	0.87 (0.86, 0.89)
0.6	1	30	300	0.5	Loose Linkage	RRBLUP	0.46 (0.43, 0.50)	0.85 (0.84, 0.86)	0.57 (0.54, 0.61)	1.00 (1.00, 1.00)	0.82 (0.80, 0.84)
0.6	1	30	300	0.5	Tight Linkage	BayesC	0.58 (0.55, 0.62)	0.84 (0.83, 0.85)	0.57 (0.55, 0.60)	0.95 (0.94, 0.96)	0.90 (0.89, 0.92)
0.6	1	30	300	0.5	Tight Linkage	RRBLUP	0.57 (0.53, 0.60)	0.85 (0.84, 0.86)	0.57 (0.54, 0.60)	1.00 (1.00, 1.00)	0.86 (0.84, 0.87)
0.6	1	30	300	0.5	Pleiotropy	BayesC	0.54 (0.52, 0.57)	0.85 (0.84, 0.86)	0.59 (0.56, 0.62)	0.93 (0.92, 0.93)	0.81 (0.79, 0.83)
0.6	1	30	300	0.5	Pleiotropy	RRBLUP	0.45 (0.41, 0.48)	0.85 (0.83, 0.86)	0.56 (0.53, 0.59)	1.00 (1.00, 1.00)	0.72 (0.69, 0.74)
0.6	1	30	450	-0.5	Loose Linkage	BayesC	0.55 (0.52, 0.59)	0.86 (0.85, 0.87)	0.67 (0.64, 0.70)	0.96 (0.95, 0.96)	0.87 (0.86, 0.89)
0.6	1	30	450	-0.5	Loose Linkage	RRBLUP	0.55 (0.52, 0.58)	0.87 (0.86, 0.88)	0.61 (0.59, 0.64)	1.00 (1.00, 1.00)	0.86 (0.84, 0.87)
0.6	1	30	450	-0.5	Tight Linkage	BayesC	0.65 (0.62, 0.69)	0.86 (0.85, 0.87)	0.67 (0.64, 0.70)	0.96 (0.95, 0.96)	0.91 (0.89, 0.92)
0.6	1	30	450	-0.5	Tight Linkage	RRBLUP	0.63 (0.60, 0.66)	0.86 (0.86, 0.87)	0.61 (0.58, 0.64)	1.00 (1.00, 1.00)	0.89 (0.87, 0.90)
0.6	1	30	450	-0.5	Pleiotropy	BayesC	0.58 (0.54, 0.61)	0.86 (0.85, 0.87)	0.69 (0.66, 0.71)	0.92 (0.91, 0.93)	0.84 (0.82, 0.85)
0.6	1	30	450	-0.5	Pleiotropy	RRBLUP	0.53 (0.50, 0.56)	0.85 (0.84, 0.86)	0.61 (0.59, 0.64)	1.00 (0.99, 1.00)	0.77 (0.75, 0.79)
0.6	1	30	450	0	Loose Linkage	BayesC	0.57 (0.54, 0.60)	0.86 (0.85, 0.87)	0.65 (0.62, 0.67)	0.96 (0.95, 0.96)	0.87 (0.86, 0.89)
0.6	1	30	450	0	Loose Linkage	RRBLUP	0.55 (0.52, 0.58)	0.86 (0.85, 0.87)	0.59 (0.56, 0.62)	1.00 (1.00, 1.00)	0.86 (0.84, 0.87)
0.6	1	30	450	0	Tight Linkage	BayesC	0.63 (0.60, 0.66)	0.86 (0.85, 0.86)	0.64 (0.60, 0.67)	0.95 (0.95, 0.96)	0.90 (0.88, 0.91)
0.6	1	30	450	0	Tight Linkage	RRBLUP	0.63 (0.60, 0.66)	0.86 (0.85, 0.87)	0.60 (0.58, 0.63)	1.00 (1.00, 1.00)	0.89 (0.88, 0.91)
0.6	1	30	450	0	Pleiotropy	BayesC	0.65 (0.63, 0.67)	0.87 (0.86, 0.87)	0.67 (0.64, 0.69)	0.93 (0.92, 0.94)	0.82 (0.80, 0.84)
0.6	1	30	450	0	Pleiotropy	RRBLUP	0.60 (0.58, 0.63)	0.87 (0.86, 0.88)	0.63 (0.60, 0.66)	1.00 (1.00, 1.00)	0.78 (0.75, 0.80)
0.6	1	30	450	0.5	Loose Linkage	BayesC	0.59 (0.56, 0.61)	0.86 (0.85, 0.87)	0.68 (0.65, 0.70)	0.96 (0.95, 0.96)	0.88 (0.86, 0.89)
0.6	1	30	450	0.5	Loose Linkage	RRBLUP	0.56 (0.53, 0.60)	0.86 (0.85, 0.87)	0.62 (0.59, 0.65)	1.00 (1.00, 1.00)	0.84 (0.82, 0.86)
0.6	1	30	450	0.5	Tight Linkage	BayesC	0.65 (0.62, 0.68)	0.85 (0.85, 0.86)	0.64 (0.61, 0.67)	0.96 (0.95, 0.96)	0.90 (0.89, 0.91)
0.6	1	30	450	0.5	Tight Linkage	RRBLUP	0.65 (0.62, 0.68)	0.86 (0.85, 0.87)	0.63 (0.60, 0.65)	1.00 (1.00, 1.00)	0.89 (0.88, 0.91)
0.6	1	30	450	0.5	Pleiotropy	BayesC	0.60 (0.57, 0.62)	0.87 (0.86, 0.88)	0.66 (0.64, 0.69)	0.92 (0.91, 0.93)	0.82 (0.80, 0.84)
0.6	1	30	450	0.5	Pleiotropy	RRBLUP	0.57 (0.54, 0.59)	0.86 (0.85, 0.87)	0.61 (0.59, 0.64)	1.00 (1.00, 1.00)	0.77 (0.75, 0.79)
0.6	1	30	600	-0.5	Loose Linkage	BayesC	0.62 (0.59, 0.65)	0.86 (0.86, 0.87)	0.69 (0.67, 0.72)	0.96 (0.96, 0.97)	0.88 (0.86, 0.90)
0.6	1	30	600	-0.5	Loose Linkage	RRBLUP	0.57 (0.53, 0.60)	0.88 (0.87, 0.89)	0.65 (0.63, 0.67)	1.00 (1.00, 1.00)	0.87 (0.85, 0.88)
0.6	1	30	600	-0.5	Tight Linkage	BayesC	0.66 (0.63, 0.68)	0.86 (0.86, 0.87)	0.70 (0.68, 0.72)	0.96 (0.96, 0.96)	0.90 (0.88, 0.92)
0.6	1	30	600	-0.5	Tight Linkage	RRBLUP	0.66 (0.63, 0.69)	0.87 (0.86, 0.88)	0.65 (0.62, 0.67)	1.00 (1.00, 1.00)	0.92 (0.91, 0.93)
0.6	1	30	600	-0.5	Pleiotropy	BayesC	0.59 (0.57, 0.62)	0.86 (0.85, 0.87)	0.69 (0.67, 0.72)	0.93 (0.92, 0.93)	0.83 (0.81, 0.84)
0.6	1	30	600	-0.5	Pleiotropy	RRBLUP	0.59 (0.56, 0.62)	0.87 (0.86, 0.88)	0.65 (0.62, 0.67)	0.99 (0.99, 1.00)	0.79 (0.77, 0.81)
0.6	1	30	600	0	Loose Linkage	BayesC	0.63 (0.59, 0.66)	0.86 (0.85, 0.87)	0.73 (0.71, 0.75)	0.96 (0.95, 0.96)	0.88 (0.87, 0.90)
0.6	1	30	600	0	Loose Linkage	RRBLUP	0.58 (0.56, 0.61)	0.87 (0.86, 0.88)	0.65 (0.63, 0.67)	1.00 (1.00, 1.00)	0.86 (0.84, 0.88)
0.6	1	30	600	0	Tight Linkage	BayesC	0.69 (0.66, 0.71)	0.86 (0.85, 0.87)	0.71 (0.69, 0.73)	0.96 (0.96, 0.97)	0.91 (0.89, 0.92)
0.6	1	30	600	0	Tight Linkage	RRBLUP	0.69 (0.66, 0.71)	0.87 (0.87, 0.88)	0.65 (0.63, 0.68)	1.00 (1.00, 1.00)	0.90 (0.89, 0.91)
0.6	1	30	600	0	Pleiotropy	BayesC	0.67 (0.64, 0.69)	0.86 (0.85, 0.87)	0.70 (0.67, 0.72)	0.93 (0.93, 0.94)	0.83 (0.81, 0.84)
0.6	1	30	600	0	Pleiotropy	RRBLUP	0.62 (0.59, 0.64)	0.87 (0.86, 0.88)	0.63 (0.60, 0.65)	0.99 (0.99, 1.00)	0.77 (0.75, 0.80)
0.6	1	30	600	0.5	Loose Linkage	BayesC	0.61 (0.58, 0.64)	0.87 (0.86, 0.88)	0.73 (0.71, 0.75)	0.96 (0.96, 0.96)	0.89 (0.87, 0.90)
0.6	1	30	600	0.5	Loose Linkage	RRBLUP	0.57 (0.54, 0.60)	0.87 (0.87, 0.88)	0.64 (0.61, 0.67)	1.00 (1.00, 1.00)	0.87 (0.85, 0.89)
0.6	1	30	600	0.5	Tight Linkage	BayesC	0.69 (0.66, 0.71)	0.87 (0.86, 0.88)	0.72 (0.70, 0.75)	0.96 (0.96, 0.97)	0.92 (0.90, 0.93)
0.6	1	30	600	0.5	Tight Linkage	RRBLUP	0.69 (0.66, 0.71)	0.87 (0.87, 0.88)	0.64 (0.62, 0.67)	1.00 (1.00, 1.00)	0.89 (0.88, 0.91)
0.6	1	30	600	0.5	Pleiotropy	BayesC	0.61 (0.58, 0.63)	0.86 (0.85, 0.87)	0.71 (0.69, 0.74)	0.93 (0.92, 0.93)	0.83 (0.81, 0.84)
0.6	1	30	600	0.5	Pleiotropy	RRBLUP	0.57 (0.55, 0.60)	0.87 (0.86, 0.88)	0.65 (0.62, 0.67)	0.99 (0.99, 1.00)	0.79 (0.77, 0.81)
0.6	1	100	150	-0.5	Loose Linkage	BayesC	0.48 (0.45, 0.52)	0.83 (0.82, 0.84)	0.52 (0.49, 0.55)	0.99 (0.99, 0.99)	0.85 (0.83, 0.87)
0.6	1	100	150	-0.5	Loose Linkage	RRBLUP	0.47 (0.43, 0.50)	0.83 (0.82, 0.84)	0.49 (0.46, 0.52)	1.00 (1.00, 1.00)	0.86 (0.84, 0.89)
0.6	1	100	150	-0.5	Tight Linkage	BayesC	0.51 (0.46, 0.55)	0.83 (0.82, 0.84)	0.50 (0.47, 0.52)	0.99 (0.99, 0.99)	0.90 (0.88, 0.91)
0.6	1	100	150	-0.5	Tight Linkage	RRBLUP	0.52 (0.48, 0.56)	0.82 (0.81, 0.83)	0.49 (0.46, 0.52)	1.00 (1.00, 1.00)	0.91 (0.90, 0.93)
0.6	1	100	150	-0.5	Pleiotropy	BayesC	0.37 (0.34, 0.41)	0.82 (0.81, 0.83)	0.49 (0.46, 0.52)	0.97 (0.97, 0.98)	0.59 (0.56, 0.62)
0.6	1	100	150	-0.5	Pleiotropy	RRBLUP	0.40 (0.37, 0.43)	0.83 (0.81, 0.84)	0.52 (0.49, 0.55)	1.00 (1.00, 1.00)	0.65 (0.62, 0.67)
0.6	1	100	150	0	Loose Linkage	BayesC	0.45 (0.41, 0.48)	0.82 (0.81, 0.83)	0.53 (0.50, 0.56)	0.99 (0.99, 0.99)	0.88 (0.86, 0.89)
0.6	1	100	150	0	Loose Linkage	RRBLUP	0.50 (0.47, 0.53)	0.83 (0.81, 0.84)	0.51 (0.48, 0.54)	1.00 (1.00, 1.00)	0.89 (0.87, 0.91)
0.6	1	100	150	0	Tight Linkage	BayesC	0.55 (0.52, 0.58)	0.83 (0.82, 0.84)	0.48 (0.45, 0.51)	0.99 (0.99, 0.99)	0.91 (0.90, 0.92)
0.6	1	100	150	0	Tight Linkage	RRBLUP	0.57 (0.54, 0.60)	0.83 (0.82, 0.84)	0.49 (0.45, 0.52)	1.00 (1.00, 1.00)	0.90 (0.89, 0.92)
0.6	1	100	150	0	Pleiotropy	BayesC	0.39 (0.36, 0.43)	0.84 (0.83, 0.85)	0.49 (0.46, 0.52)	0.98 (0.97, 0.98)	0.62 (0.59, 0.65)
0.6	1	100	150	0	Pleiotropy	RRBLUP	0.42 (0.39, 0.46)	0.83 (0.82, 0.84)	0.53 (0.50, 0.56)	1.00 (1.00, 1.00)	0.66 (0.63, 0.69)
0.6	1	100	150	0.5	Loose Linkage	BayesC	0.50 (0.46, 0.53)	0.83 (0.82, 0.84)	0.50 (0.47, 0.53)	0.99 (0.99, 0.99)	0.86 (0.85, 0.88)
0.6	1	100	150	0.5	Loose Linkage	RRBLUP	0.48 (0.45, 0.51)	0.83 (0.82, 0.84)	0.50 (0.47, 0.53)	1.00 (1.00, 1.00)	0.88 (0.86, 0.89)
0.6	1	100	150	0.5	Tight Linkage	BayesC	0.54 (0.51, 0.57)	0.83 (0.82, 0.84)	0.48 (0.45, 0.51)	0.99 (0.99, 0.99)	0.90 (0.88, 0.92)
0.6	1	100	150	0.5	Tight Linkage	RRBLUP	0.54 (0.51, 0.57)	0.83 (0.82, 0.84)	0.50 (0.47, 0.54)	1.00 (1.00, 1.00)	0.90 (0.89, 0.92)
0.6	1	100	150	0.5	Pleiotropy	BayesC	0.37 (0.33, 0.40)	0.83 (0.82, 0.84)	0.49 (0.46, 0.52)	0.98 (0.97, 0.98)	0.60 (0.57, 0.63)
0.6	1	100	150	0.5	Pleiotropy	RRBLUP	0.34 (0.31, 0.37)	0.83 (0.82, 0.84)	0.49 (0.46, 0.52)	1.00 (1.00, 1.00)	0.58 (0.55, 0.61)
0.6	1	100	300	-0.5	Loose Linkage	BayesC	0.56 (0.53, 0.59)	0.85 (0.84, 0.86)	0.60 (0.57, 0.62)	0.99 (0.98, 0.99)	0.90 (0.89, 0.91)
0.6	1	100	300	-0.5	Loose Linkage	RRBLUP	0.58 (0.55, 0.61)	0.85 (0.84, 0.86)	0.55 (0.53, 0.58)	1.00 (1.00, 1.00)	0.90 (0.89, 0.92)
0.6	1	100	300	-0.5	Tight Linkage	BayesC	0.58 (0.55, 0.62)	0.84 (0.83, 0.85)	0.57 (0.54, 0.59)	0.99 (0.98, 0.99)	0.94 (0.93, 0.95)
0.6	1	100	300	-0.5	Tight Linkage	RRBLUP	0.59 (0.56, 0.62)	0.84 (0.83, 0.85)	0.54 (0.51, 0.57)	1.00 (1.00, 1.00)	0.92 (0.91, 0.94)
0.6	1	100	300	-0.5	Pleiotropy	BayesC	0.47 (0.44, 0.50)	0.85 (0.84, 0.86)	0.55 (0.52, 0.58)	0.97 (0.97, 0.98)	0.74 (0.73, 0.76)
0.6	1	100	300	-0.5	Pleiotropy	RRBLUP	0.48 (0.45, 0.51)	0.85 (0.84, 0.86)	0.56 (0.53, 0.58)	1.00 (1.00, 1.00)	0.71 (0.69, 0.73)
0.6	1	100	300	0	Loose Linkage	BayesC	0.56 (0.53, 0.59)	0.85 (0.84, 0.86)	0.60 (0.57, 0.62)	0.99 (0.98, 0.99)	0.90 (0.88, 0.91)
0.6	1	100	300	0	Loose Linkage	RRBLUP	0.57 (0.54, 0.60)	0.85 (0.84, 0.86)	0.57 (0.54, 0.60)	1.00 (1.00, 1.00)	0.90 (0.89, 0.92)
0.6	1	100	300	0	Tight Linkage	BayesC	0.64 (0.61, 0.66)	0.84 (0.83, 0.85)	0.57 (0.55, 0.59)	0.99 (0.98, 0.99)	0.93 (0.92, 0.94)
0.6	1	100	300	0	Tight Linkage	RRBLUP	0.63 (0.61, 0.66)	0.85 (0.83, 0.86)	0.56 (0.54, 0.59)	1.00 (1.00, 1.00)	0.93 (0.92, 0.94)
0.6	1	100	300	0	Pleiotropy	BayesC	0.51 (0.49, 0.54)	0.85 (0.84, 0.86)	0.57 (0.54, 0.61)	0.98 (0.98, 0.98)	0.72 (0.70, 0.74)
0.6	1	100	300	0	Pleiotropy	RRBLUP	0.50 (0.47, 0.53)	0.85 (0.84, 0.86)	0.56 (0.53, 0.59)	1.00 (1.00, 1.00)	0.72 (0.70, 0.74)
0.6	1	100	300	0.5	Loose Linkage	BayesC	0.56 (0.53, 0.58)	0.84 (0.83, 0.85)	0.56 (0.53, 0.59)	0.99 (0.98, 0.99)	0.91 (0.89, 0.92)
0.6	1	100	300	0.5	Loose Linkage	RRBLUP	0.56 (0.53, 0.59)	0.85 (0.83, 0.86)	0.59 (0.56, 0.61)	1.00 (1.00, 1.00)	0.91 (0.90, 0.92)
0.6	1	100	300	0.5	Tight Linkage	BayesC	0.63 (0.60, 0.66)	0.84 (0.83, 0.85)	0.59 (0.56, 0.61)	0.99 (0.99, 0.99)	0.94 (0.93, 0.95)
0.6	1	100	300	0.5	Tight Linkage	RRBLUP	0.60 (0.57, 0.63)	0.85 (0.84, 0.86)	0.57 (0.54, 0.60)	1.00 (1.00, 1.00)	0.93 (0.92, 0.94)
0.6	1	100	300	0.5	Pleiotropy	BayesC	0.45 (0.42, 0.48)	0.84 (0.83, 0.85)	0.57 (0.54, 0.60)	0.97 (0.97, 0.97)	0.72 (0.70, 0.74)
0.6	1	100	300	0.5	Pleiotropy	RRBLUP	0.50 (0.47, 0.53)	0.85 (0.84, 0.85)	0.58 (0.55, 0.61)	1.00 (1.00, 1.00)	0.72 (0.70, 0.74)
0.6	1	100	450	-0.5	Loose Linkage	BayesC	0.62 (0.60, 0.65)	0.85 (0.84, 0.86)	0.63 (0.60, 0.65)	0.99 (0.99, 0.99)	0.91 (0.90, 0.92)
0.6	1	100	450	-0.5	Loose Linkage	RRBLUP	0.58 (0.55, 0.60)	0.86 (0.85, 0.87)	0.60 (0.58, 0.63)	1.00 (1.00, 1.00)	0.92 (0.91, 0.93)
0.6	1	100	450	-0.5	Tight Linkage	BayesC	0.66 (0.64, 0.69)	0.86 (0.85, 0.87)	0.61 (0.58, 0.64)	0.99 (0.99, 0.99)	0.94 (0.93, 0.95)
0.6	1	100	450	-0.5	Tight Linkage	RRBLUP	0.65 (0.62, 0.67)	0.86 (0.86, 0.87)	0.60 (0.57, 0.63)	1.00 (1.00, 1.00)	0.94 (0.94, 0.95)
0.6	1	100	450	-0.5	Pleiotropy	BayesC	0.53 (0.50, 0.56)	0.86 (0.85, 0.87)	0.64 (0.61, 0.66)	0.97 (0.96, 0.97)	0.79 (0.77, 0.81)
0.6	1	100	450	-0.5	Pleiotropy	RRBLUP	0.52 (0.49, 0.55)	0.86 (0.85, 0.87)	0.61 (0.59, 0.64)	1.00 (1.00, 1.00)	0.76 (0.74, 0.78)
0.6	1	100	450	0	Loose Linkage	BayesC	0.61 (0.59, 0.64)	0.87 (0.86, 0.87)	0.63 (0.60, 0.65)	0.99 (0.99, 0.99)	0.92 (0.91, 0.94)
0.6	1	100	450	0	Loose Linkage	RRBLUP	0.59 (0.56, 0.62)	0.86 (0.85, 0.87)	0.60 (0.57, 0.62)	1.00 (1.00, 1.00)	0.91 (0.90, 0.92)
0.6	1	100	450	0	Tight Linkage	BayesC	0.67 (0.64, 0.70)	0.86 (0.85, 0.86)	0.61 (0.58, 0.64)	0.99 (0.99, 0.99)	0.95 (0.94, 0.96)
0.6	1	100	450	0	Tight Linkage	RRBLUP	0.66 (0.64, 0.69)	0.86 (0.85, 0.87)	0.60 (0.57, 0.63)	1.00 (1.00, 1.00)	0.94 (0.93, 0.95)
0.6	1	100	450	0	Pleiotropy	BayesC	0.61 (0.58, 0.63)	0.86 (0.85, 0.87)	0.63 (0.60, 0.65)	0.97 (0.97, 0.97)	0.79 (0.78, 0.81)
0.6	1	100	450	0	Pleiotropy	RRBLUP	0.58 (0.55, 0.60)	0.87 (0.86, 0.88)	0.61 (0.58, 0.63)	1.00 (1.00, 1.00)	0.76 (0.74, 0.78)
0.6	1	100	450	0.5	Loose Linkage	BayesC	0.61 (0.59, 0.64)	0.86 (0.85, 0.87)	0.62 (0.60, 0.65)	0.99 (0.98, 0.99)	0.92 (0.91, 0.93)
0.6	1	100	450	0.5	Loose Linkage	RRBLUP	0.59 (0.56, 0.61)	0.86 (0.86, 0.87)	0.60 (0.57, 0.63)	1.00 (1.00, 1.00)	0.92 (0.91, 0.93)
0.6	1	100	450	0.5	Tight Linkage	BayesC	0.66 (0.63, 0.68)	0.86 (0.85, 0.87)	0.60 (0.58, 0.63)	0.99 (0.98, 0.99)	0.94 (0.93, 0.95)
0.6	1	100	450	0.5	Tight Linkage	RRBLUP	0.64 (0.61, 0.67)	0.86 (0.85, 0.87)	0.59 (0.57, 0.62)	1.00 (1.00, 1.00)	0.94 (0.94, 0.95)
0.6	1	100	450	0.5	Pleiotropy	BayesC	0.54 (0.52, 0.57)	0.87 (0.86, 0.87)	0.62 (0.59, 0.65)	0.97 (0.96, 0.97)	0.79 (0.78, 0.81)
0.6	1	100	450	0.5	Pleiotropy	RRBLUP	0.54 (0.51, 0.56)	0.86 (0.86, 0.87)	0.62 (0.59, 0.64)	1.00 (1.00, 1.00)	0.76 (0.74, 0.78)
0.6	1	100	600	-0.5	Loose Linkage	BayesC	0.65 (0.63, 0.67)	0.87 (0.86, 0.88)	0.66 (0.63, 0.68)	0.99 (0.99, 0.99)	0.93 (0.92, 0.94)
0.6	1	100	600	-0.5	Loose Linkage	RRBLUP	0.65 (0.63, 0.68)	0.88 (0.87, 0.88)	0.63 (0.61, 0.66)	1.00 (1.00, 1.00)	0.93 (0.92, 0.94)
0.6	1	100	600	-0.5	Tight Linkage	BayesC	0.71 (0.70, 0.73)	0.86 (0.85, 0.87)	0.66 (0.64, 0.69)	0.99 (0.99, 0.99)	0.95 (0.94, 0.96)
0.6	1	100	600	-0.5	Tight Linkage	RRBLUP	0.69 (0.67, 0.72)	0.87 (0.86, 0.88)	0.64 (0.61, 0.66)	1.00 (1.00, 1.00)	0.95 (0.94, 0.96)
0.6	1	100	600	-0.5	Pleiotropy	BayesC	0.58 (0.55, 0.61)	0.86 (0.85, 0.87)	0.66 (0.63, 0.68)	0.96 (0.96, 0.97)	0.81 (0.79, 0.82)
0.6	1	100	600	-0.5	Pleiotropy	RRBLUP	0.58 (0.56, 0.61)	0.87 (0.86, 0.88)	0.65 (0.63, 0.68)	1.00 (0.99, 1.00)	0.81 (0.79, 0.82)
0.6	1	100	600	0	Loose Linkage	BayesC	0.65 (0.62, 0.68)	0.87 (0.86, 0.87)	0.63 (0.61, 0.65)	0.99 (0.99, 0.99)	0.93 (0.92, 0.94)
0.6	1	100	600	0	Loose Linkage	RRBLUP	0.65 (0.63, 0.67)	0.87 (0.86, 0.88)	0.65 (0.62, 0.67)	1.00 (1.00, 1.00)	0.93 (0.92, 0.94)
0.6	1	100	600	0	Tight Linkage	BayesC	0.69 (0.67, 0.72)	0.86 (0.85, 0.87)	0.66 (0.64, 0.68)	0.99 (0.99, 0.99)	0.94 (0.93, 0.95)
0.6	1	100	600	0	Tight Linkage	RRBLUP	0.72 (0.70, 0.74)	0.87 (0.87, 0.88)	0.65 (0.62, 0.67)	1.00 (1.00, 1.00)	0.96 (0.95, 0.96)
0.6	1	100	600	0	Pleiotropy	BayesC	0.62 (0.59, 0.64)	0.86 (0.85, 0.87)	0.65 (0.63, 0.67)	0.97 (0.96, 0.97)	0.80 (0.79, 0.82)
0.6	1	100	600	0	Pleiotropy	RRBLUP	0.63 (0.61, 0.65)	0.87 (0.86, 0.87)	0.63 (0.60, 0.65)	1.00 (0.99, 1.00)	0.80 (0.79, 0.82)
0.6	1	100	600	0.5	Loose Linkage	BayesC	0.64 (0.62, 0.67)	0.87 (0.86, 0.88)	0.65 (0.63, 0.68)	0.99 (0.99, 0.99)	0.93 (0.92, 0.94)
0.6	1	100	600	0.5	Loose Linkage	RRBLUP	0.63 (0.60, 0.65)	0.87 (0.86, 0.87)	0.65 (0.62, 0.67)	1.00 (1.00, 1.00)	0.92 (0.90, 0.93)
0.6	1	100	600	0.5	Tight Linkage	BayesC	0.71 (0.69, 0.74)	0.87 (0.86, 0.88)	0.66 (0.63, 0.68)	0.99 (0.99, 0.99)	0.96 (0.95, 0.96)
0.6	1	100	600	0.5	Tight Linkage	RRBLUP	0.69 (0.66, 0.71)	0.88 (0.87, 0.88)	0.66 (0.63, 0.68)	1.00 (1.00, 1.00)	0.95 (0.94, 0.96)
0.6	1	100	600	0.5	Pleiotropy	BayesC	0.56 (0.53, 0.58)	0.87 (0.86, 0.88)	0.64 (0.62, 0.67)	0.97 (0.96, 0.97)	0.81 (0.79, 0.83)
0.6	1	100	600	0.5	Pleiotropy	RRBLUP	0.54 (0.52, 0.57)	0.87 (0.86, 0.88)	0.65 (0.62, 0.67)	0.99 (0.99, 1.00)	0.79 (0.78, 0.81)
1	0.3	30	150	-0.5	Loose Linkage	BayesC	0.34 (0.30, 0.38)	0.97 (0.96, 0.97)	0.65 (0.62, 0.68)	0.78 (0.77, 0.80)	0.50 (0.46, 0.54)
1	0.3	30	150	-0.5	Loose Linkage	RRBLUP	0.35 (0.31, 0.39)	1.00 (1.00, 1.00)	0.64 (0.62, 0.67)	0.79 (0.77, 0.81)	0.52 (0.49, 0.56)
1	0.3	30	150	-0.5	Tight Linkage	BayesC	0.41 (0.37, 0.45)	0.97 (0.96, 0.97)	0.65 (0.61, 0.68)	0.78 (0.76, 0.80)	0.58 (0.54, 0.62)
1	0.3	30	150	-0.5	Tight Linkage	RRBLUP	0.43 (0.39, 0.47)	1.00 (1.00, 1.00)	0.62 (0.59, 0.64)	0.78 (0.77, 0.80)	0.59 (0.55, 0.63)
1	0.3	30	150	-0.5	Pleiotropy	BayesC	0.34 (0.31, 0.38)	0.97 (0.97, 0.97)	0.66 (0.63, 0.69)	0.67 (0.64, 0.69)	0.39 (0.35, 0.43)
1	0.3	30	150	-0.5	Pleiotropy	RRBLUP	0.29 (0.26, 0.33)	1.00 (1.00, 1.00)	0.63 (0.60, 0.65)	0.68 (0.66, 0.70)	0.36 (0.32, 0.39)
1	0.3	30	150	0	Loose Linkage	BayesC	0.29 (0.25, 0.33)	0.97 (0.97, 0.98)	0.63 (0.60, 0.66)	0.77 (0.75, 0.79)	0.45 (0.41, 0.49)
1	0.3	30	150	0	Loose Linkage	RRBLUP	0.37 (0.34, 0.41)	1.00 (1.00, 1.00)	0.64 (0.61, 0.67)	0.79 (0.77, 0.80)	0.51 (0.47, 0.54)
1	0.3	30	150	0	Tight Linkage	BayesC	0.41 (0.37, 0.45)	0.97 (0.97, 0.97)	0.66 (0.63, 0.69)	0.78 (0.76, 0.79)	0.56 (0.52, 0.60)
1	0.3	30	150	0	Tight Linkage	RRBLUP	0.43 (0.39, 0.47)	1.00 (1.00, 1.00)	0.65 (0.63, 0.68)	0.79 (0.77, 0.81)	0.54 (0.50, 0.59)
1	0.3	30	150	0	Pleiotropy	BayesC	0.34 (0.30, 0.38)	0.97 (0.96, 0.97)	0.63 (0.60, 0.66)	0.69 (0.67, 0.71)	0.41 (0.37, 0.44)
1	0.3	30	150	0	Pleiotropy	RRBLUP	0.36 (0.32, 0.39)	1.00 (1.00, 1.00)	0.62 (0.59, 0.65)	0.66 (0.64, 0.69)	0.37 (0.34, 0.40)
1	0.3	30	150	0.5	Loose Linkage	BayesC	0.35 (0.31, 0.38)	0.97 (0.97, 0.97)	0.66 (0.63, 0.69)	0.77 (0.76, 0.79)	0.50 (0.46, 0.54)
1	0.3	30	150	0.5	Loose Linkage	RRBLUP	0.34 (0.30, 0.38)	1.00 (1.00, 1.00)	0.65 (0.62, 0.68)	0.78 (0.77, 0.80)	0.51 (0.47, 0.55)
1	0.3	30	150	0.5	Tight Linkage	BayesC	0.39 (0.35, 0.43)	0.97 (0.97, 0.97)	0.63 (0.60, 0.66)	0.77 (0.76, 0.79)	0.58 (0.54, 0.61)
1	0.3	30	150	0.5	Tight Linkage	RRBLUP	0.43 (0.39, 0.46)	1.00 (1.00, 1.00)	0.62 (0.59, 0.65)	0.79 (0.77, 0.81)	0.60 (0.57, 0.64)
1	0.3	30	150	0.5	Pleiotropy	BayesC	0.32 (0.29, 0.36)	0.97 (0.96, 0.97)	0.65 (0.63, 0.68)	0.65 (0.62, 0.67)	0.38 (0.34, 0.42)
1	0.3	30	150	0.5	Pleiotropy	RRBLUP	0.33 (0.29, 0.37)	1.00 (0.99, 1.00)	0.62 (0.59, 0.64)	0.67 (0.65, 0.69)	0.38 (0.34, 0.43)
1	0.3	30	300	-0.5	Loose Linkage	BayesC	0.39 (0.35, 0.42)	0.93 (0.92, 0.94)	0.78 (0.76, 0.80)	0.81 (0.79, 0.82)	0.55 (0.51, 0.58)
1	0.3	30	300	-0.5	Loose Linkage	RRBLUP	0.38 (0.35, 0.42)	1.00 (1.00, 1.00)	0.71 (0.69, 0.74)	0.82 (0.81, 0.84)	0.56 (0.52, 0.59)
1	0.3	30	300	-0.5	Tight Linkage	BayesC	0.49 (0.45, 0.52)	0.93 (0.92, 0.94)	0.76 (0.74, 0.78)	0.82 (0.81, 0.84)	0.62 (0.59, 0.66)
1	0.3	30	300	-0.5	Tight Linkage	RRBLUP	0.49 (0.45, 0.52)	1.00 (1.00, 1.00)	0.71 (0.69, 0.73)	0.83 (0.82, 0.85)	0.64 (0.60, 0.68)
1	0.3	30	300	-0.5	Pleiotropy	BayesC	0.43 (0.39, 0.46)	0.92 (0.92, 0.93)	0.81 (0.79, 0.83)	0.72 (0.71, 0.74)	0.49 (0.46, 0.53)
1	0.3	30	300	-0.5	Pleiotropy	RRBLUP	0.40 (0.37, 0.44)	1.00 (1.00, 1.00)	0.73 (0.71, 0.76)	0.72 (0.71, 0.74)	0.46 (0.42, 0.50)
1	0.3	30	300	0	Loose Linkage	BayesC	0.41 (0.37, 0.44)	0.93 (0.92, 0.94)	0.79 (0.77, 0.81)	0.82 (0.81, 0.84)	0.60 (0.56, 0.63)
1	0.3	30	300	0	Loose Linkage	RRBLUP	0.43 (0.40, 0.47)	1.00 (1.00, 1.00)	0.73 (0.71, 0.76)	0.83 (0.82, 0.85)	0.57 (0.54, 0.60)
1	0.3	30	300	0	Tight Linkage	BayesC	0.51 (0.48, 0.54)	0.93 (0.93, 0.94)	0.76 (0.74, 0.78)	0.82 (0.80, 0.83)	0.63 (0.60, 0.66)
1	0.3	30	300	0	Tight Linkage	RRBLUP	0.51 (0.48, 0.55)	1.00 (1.00, 1.00)	0.69 (0.67, 0.72)	0.84 (0.82, 0.85)	0.64 (0.60, 0.67)
1	0.3	30	300	0	Pleiotropy	BayesC	0.49 (0.46, 0.53)	0.93 (0.92, 0.94)	0.78 (0.76, 0.80)	0.71 (0.69, 0.73)	0.47 (0.44, 0.51)
1	0.3	30	300	0	Pleiotropy	RRBLUP	0.47 (0.44, 0.51)	1.00 (1.00, 1.00)	0.74 (0.71, 0.76)	0.72 (0.70, 0.75)	0.44 (0.40, 0.48)
1	0.3	30	300	0.5	Loose Linkage	BayesC	0.43 (0.39, 0.47)	0.94 (0.94, 0.95)	0.77 (0.75, 0.79)	0.81 (0.80, 0.83)	0.56 (0.52, 0.59)
1	0.3	30	300	0.5	Loose Linkage	RRBLUP	0.38 (0.34, 0.42)	1.00 (1.00, 1.00)	0.73 (0.71, 0.75)	0.82 (0.81, 0.84)	0.57 (0.53, 0.61)
1	0.3	30	300	0.5	Tight Linkage	BayesC	0.49 (0.45, 0.53)	0.93 (0.92, 0.94)	0.79 (0.77, 0.80)	0.83 (0.82, 0.84)	0.64 (0.60, 0.68)
1	0.3	30	300	0.5	Tight Linkage	RRBLUP	0.52 (0.49, 0.55)	1.00 (1.00, 1.00)	0.70 (0.67, 0.72)	0.84 (0.83, 0.86)	0.62 (0.59, 0.66)
1	0.3	30	300	0.5	Pleiotropy	BayesC	0.43 (0.40, 0.47)	0.93 (0.92, 0.94)	0.81 (0.79, 0.82)	0.72 (0.71, 0.74)	0.50 (0.47, 0.53)
1	0.3	30	300	0.5	Pleiotropy	RRBLUP	0.38 (0.34, 0.42)	1.00 (1.00, 1.00)	0.70 (0.67, 0.72)	0.70 (0.68, 0.72)	0.42 (0.39, 0.46)
1	0.3	30	450	-0.5	Loose Linkage	BayesC	0.47 (0.44, 0.50)	0.92 (0.92, 0.93)	0.82 (0.81, 0.84)	0.83 (0.82, 0.85)	0.60 (0.57, 0.63)
1	0.3	30	450	-0.5	Loose Linkage	RRBLUP	0.41 (0.37, 0.44)	1.00 (1.00, 1.00)	0.76 (0.74, 0.78)	0.84 (0.83, 0.85)	0.59 (0.56, 0.63)
1	0.3	30	450	-0.5	Tight Linkage	BayesC	0.54 (0.50, 0.57)	0.93 (0.93, 0.94)	0.82 (0.80, 0.83)	0.85 (0.83, 0.86)	0.69 (0.66, 0.72)
1	0.3	30	450	-0.5	Tight Linkage	RRBLUP	0.53 (0.49, 0.56)	1.00 (1.00, 1.00)	0.77 (0.75, 0.79)	0.84 (0.83, 0.85)	0.62 (0.58, 0.66)
1	0.3	30	450	-0.5	Pleiotropy	BayesC	0.45 (0.41, 0.48)	0.92 (0.92, 0.93)	0.80 (0.78, 0.82)	0.75 (0.73, 0.77)	0.50 (0.46, 0.53)
1	0.3	30	450	-0.5	Pleiotropy	RRBLUP	0.45 (0.42, 0.48)	1.00 (0.99, 1.00)	0.77 (0.75, 0.80)	0.75 (0.73, 0.76)	0.50 (0.47, 0.53)
1	0.3	30	450	0	Loose Linkage	BayesC	0.43 (0.39, 0.47)	0.93 (0.92, 0.94)	0.82 (0.80, 0.84)	0.84 (0.83, 0.85)	0.62 (0.59, 0.65)
1	0.3	30	450	0	Loose Linkage	RRBLUP	0.47 (0.43, 0.50)	1.00 (1.00, 1.00)	0.78 (0.76, 0.80)	0.84 (0.82, 0.85)	0.59 (0.56, 0.63)
1	0.3	30	450	0	Tight Linkage	BayesC	0.57 (0.53, 0.60)	0.93 (0.92, 0.94)	0.82 (0.81, 0.84)	0.84 (0.83, 0.86)	0.68 (0.65, 0.71)
1	0.3	30	450	0	Tight Linkage	RRBLUP	0.57 (0.53, 0.60)	0.99 (0.99, 1.00)	0.75 (0.73, 0.77)	0.85 (0.84, 0.86)	0.67 (0.63, 0.70)
1	0.3	30	450	0	Pleiotropy	BayesC	0.51 (0.48, 0.55)	0.93 (0.93, 0.94)	0.81 (0.79, 0.83)	0.75 (0.73, 0.76)	0.52 (0.50, 0.55)
1	0.3	30	450	0	Pleiotropy	RRBLUP	0.50 (0.47, 0.53)	1.00 (0.99, 1.00)	0.76 (0.73, 0.78)	0.74 (0.72, 0.76)	0.49 (0.46, 0.52)
1	0.3	30	450	0.5	Loose Linkage	BayesC	0.43 (0.40, 0.47)	0.93 (0.92, 0.94)	0.80 (0.79, 0.82)	0.84 (0.83, 0.85)	0.62 (0.59, 0.65)
1	0.3	30	450	0.5	Loose Linkage	RRBLUP	0.41 (0.37, 0.44)	1.00 (0.99, 1.00)	0.77 (0.75, 0.79)	0.85 (0.84, 0.86)	0.58 (0.55, 0.61)
1	0.3	30	450	0.5	Tight Linkage	BayesC	0.55 (0.51, 0.58)	0.94 (0.93, 0.94)	0.81 (0.80, 0.83)	0.85 (0.84, 0.86)	0.69 (0.66, 0.73)
1	0.3	30	450	0.5	Tight Linkage	RRBLUP	0.56 (0.52, 0.59)	1.00 (0.99, 1.00)	0.78 (0.75, 0.80)	0.85 (0.84, 0.87)	0.67 (0.64, 0.71)
1	0.3	30	450	0.5	Pleiotropy	BayesC	0.48 (0.45, 0.52)	0.93 (0.92, 0.93)	0.81 (0.80, 0.83)	0.74 (0.72, 0.75)	0.54 (0.51, 0.57)
1	0.3	30	450	0.5	Pleiotropy	RRBLUP	0.43 (0.40, 0.47)	1.00 (1.00, 1.00)	0.78 (0.76, 0.80)	0.75 (0.73, 0.76)	0.46 (0.43, 0.50)
1	0.3	30	600	-0.5	Loose Linkage	BayesC	0.48 (0.45, 0.52)	0.93 (0.93, 0.94)	0.83 (0.82, 0.85)	0.86 (0.85, 0.87)	0.65 (0.62, 0.68)
1	0.3	30	600	-0.5	Loose Linkage	RRBLUP	0.47 (0.44, 0.50)	0.99 (0.99, 1.00)	0.78 (0.76, 0.80)	0.87 (0.86, 0.88)	0.62 (0.59, 0.65)
1	0.3	30	600	-0.5	Tight Linkage	BayesC	0.55 (0.52, 0.59)	0.93 (0.93, 0.94)	0.82 (0.81, 0.84)	0.86 (0.85, 0.87)	0.68 (0.64, 0.71)
1	0.3	30	600	-0.5	Tight Linkage	RRBLUP	0.60 (0.57, 0.63)	0.99 (0.99, 1.00)	0.80 (0.78, 0.82)	0.88 (0.87, 0.89)	0.71 (0.68, 0.75)
1	0.3	30	600	-0.5	Pleiotropy	BayesC	0.54 (0.51, 0.57)	0.93 (0.93, 0.94)	0.82 (0.80, 0.84)	0.77 (0.76, 0.79)	0.53 (0.50, 0.57)
1	0.3	30	600	-0.5	Pleiotropy	RRBLUP	0.47 (0.43, 0.50)	0.99 (0.99, 1.00)	0.79 (0.78, 0.81)	0.75 (0.74, 0.77)	0.51 (0.48, 0.54)
1	0.3	30	600	0	Loose Linkage	BayesC	0.48 (0.45, 0.51)	0.92 (0.91, 0.93)	0.82 (0.81, 0.84)	0.86 (0.85, 0.87)	0.65 (0.62, 0.69)
1	0.3	30	600	0	Loose Linkage	RRBLUP	0.47 (0.43, 0.51)	1.00 (0.99, 1.00)	0.81 (0.79, 0.83)	0.86 (0.85, 0.87)	0.63 (0.59, 0.66)
1	0.3	30	600	0	Tight Linkage	BayesC	0.58 (0.55, 0.61)	0.93 (0.92, 0.93)	0.81 (0.79, 0.83)	0.86 (0.85, 0.87)	0.69 (0.65, 0.72)
1	0.3	30	600	0	Tight Linkage	RRBLUP	0.57 (0.54, 0.61)	0.99 (0.99, 1.00)	0.79 (0.77, 0.81)	0.87 (0.86, 0.88)	0.70 (0.67, 0.73)
1	0.3	30	600	0	Pleiotropy	BayesC	0.58 (0.55, 0.61)	0.93 (0.92, 0.93)	0.81 (0.80, 0.83)	0.76 (0.75, 0.78)	0.57 (0.54, 0.60)
1	0.3	30	600	0	Pleiotropy	RRBLUP	0.57 (0.55, 0.60)	1.00 (0.99, 1.00)	0.79 (0.78, 0.81)	0.77 (0.75, 0.78)	0.54 (0.51, 0.58)
1	0.3	30	600	0.5	Loose Linkage	BayesC	0.46 (0.42, 0.50)	0.93 (0.93, 0.94)	0.82 (0.80, 0.84)	0.86 (0.85, 0.87)	0.65 (0.62, 0.68)
1	0.3	30	600	0.5	Loose Linkage	RRBLUP	0.48 (0.44, 0.51)	1.00 (0.99, 1.00)	0.78 (0.77, 0.80)	0.86 (0.85, 0.87)	0.61 (0.57, 0.64)
1	0.3	30	600	0.5	Tight Linkage	BayesC	0.60 (0.56, 0.63)	0.93 (0.92, 0.93)	0.83 (0.81, 0.84)	0.86 (0.85, 0.87)	0.72 (0.69, 0.75)
1	0.3	30	600	0.5	Tight Linkage	RRBLUP	0.59 (0.56, 0.62)	0.99 (0.99, 1.00)	0.80 (0.78, 0.82)	0.86 (0.85, 0.88)	0.68 (0.64, 0.71)
1	0.3	30	600	0.5	Pleiotropy	BayesC	0.53 (0.50, 0.56)	0.93 (0.93, 0.94)	0.83 (0.82, 0.85)	0.77 (0.76, 0.79)	0.58 (0.54, 0.61)
1	0.3	30	600	0.5	Pleiotropy	RRBLUP	0.48 (0.45, 0.52)	0.99 (0.99, 1.00)	0.79 (0.77, 0.81)	0.76 (0.75, 0.78)	0.52 (0.49, 0.55)
1	0.3	100	150	-0.5	Loose Linkage	BayesC	0.41 (0.37, 0.44)	0.97 (0.97, 0.98)	0.60 (0.58, 0.63)	0.82 (0.81, 0.84)	0.60 (0.57, 0.64)
1	0.3	100	150	-0.5	Loose Linkage	RRBLUP	0.44 (0.40, 0.47)	1.00 (0.99, 1.00)	0.60 (0.57, 0.63)	0.85 (0.84, 0.87)	0.63 (0.60, 0.67)
1	0.3	100	150	-0.5	Tight Linkage	BayesC	0.43 (0.40, 0.46)	0.97 (0.97, 0.98)	0.59 (0.56, 0.62)	0.83 (0.82, 0.84)	0.64 (0.61, 0.67)
1	0.3	100	150	-0.5	Tight Linkage	RRBLUP	0.44 (0.41, 0.47)	1.00 (0.99, 1.00)	0.62 (0.60, 0.65)	0.84 (0.82, 0.85)	0.69 (0.67, 0.72)
1	0.3	100	150	-0.5	Pleiotropy	BayesC	0.30 (0.26, 0.33)	0.97 (0.97, 0.98)	0.59 (0.57, 0.62)	0.66 (0.64, 0.68)	0.41 (0.37, 0.44)
1	0.3	100	150	-0.5	Pleiotropy	RRBLUP	0.25 (0.22, 0.29)	1.00 (1.00, 1.00)	0.63 (0.60, 0.65)	0.67 (0.65, 0.69)	0.42 (0.38, 0.46)
1	0.3	100	150	0	Loose Linkage	BayesC	0.37 (0.34, 0.41)	0.98 (0.97, 0.98)	0.62 (0.59, 0.64)	0.79 (0.78, 0.81)	0.57 (0.53, 0.61)
1	0.3	100	150	0	Loose Linkage	RRBLUP	0.43 (0.39, 0.46)	1.00 (1.00, 1.00)	0.63 (0.60, 0.65)	0.85 (0.83, 0.86)	0.62 (0.59, 0.66)
1	0.3	100	150	0	Tight Linkage	BayesC	0.44 (0.41, 0.48)	0.97 (0.97, 0.98)	0.60 (0.57, 0.63)	0.81 (0.80, 0.83)	0.65 (0.62, 0.68)
1	0.3	100	150	0	Tight Linkage	RRBLUP	0.47 (0.43, 0.51)	1.00 (1.00, 1.00)	0.60 (0.57, 0.63)	0.84 (0.83, 0.86)	0.67 (0.64, 0.71)
1	0.3	100	150	0	Pleiotropy	BayesC	0.34 (0.31, 0.37)	0.97 (0.97, 0.98)	0.62 (0.59, 0.64)	0.68 (0.66, 0.70)	0.40 (0.37, 0.44)
1	0.3	100	150	0	Pleiotropy	RRBLUP	0.32 (0.28, 0.35)	1.00 (1.00, 1.00)	0.65 (0.62, 0.67)	0.69 (0.67, 0.71)	0.42 (0.38, 0.45)
1	0.3	100	150	0.5	Loose Linkage	BayesC	0.40 (0.36, 0.43)	0.98 (0.97, 0.98)	0.62 (0.59, 0.65)	0.79 (0.77, 0.81)	0.58 (0.55, 0.62)
1	0.3	100	150	0.5	Loose Linkage	RRBLUP	0.43 (0.40, 0.46)	1.00 (1.00, 1.00)	0.62 (0.60, 0.65)	0.84 (0.82, 0.85)	0.60 (0.57, 0.64)
1	0.3	100	150	0.5	Tight Linkage	BayesC	0.45 (0.42, 0.48)	0.97 (0.97, 0.98)	0.61 (0.59, 0.64)	0.82 (0.81, 0.83)	0.63 (0.60, 0.66)
1	0.3	100	150	0.5	Tight Linkage	RRBLUP	0.46 (0.43, 0.49)	1.00 (1.00, 1.00)	0.63 (0.60, 0.65)	0.84 (0.83, 0.86)	0.67 (0.64, 0.70)
1	0.3	100	150	0.5	Pleiotropy	BayesC	0.29 (0.25, 0.33)	0.97 (0.97, 0.98)	0.59 (0.56, 0.61)	0.68 (0.66, 0.70)	0.42 (0.39, 0.46)
1	0.3	100	150	0.5	Pleiotropy	RRBLUP	0.29 (0.25, 0.32)	1.00 (1.00, 1.00)	0.62 (0.59, 0.65)	0.65 (0.63, 0.68)	0.41 (0.38, 0.44)
1	0.3	100	300	-0.5	Loose Linkage	BayesC	0.43 (0.40, 0.46)	0.98 (0.97, 0.98)	0.72 (0.70, 0.74)	0.86 (0.85, 0.87)	0.66 (0.62, 0.69)
1	0.3	100	300	-0.5	Loose Linkage	RRBLUP	0.45 (0.42, 0.48)	1.00 (1.00, 1.00)	0.70 (0.67, 0.72)	0.87 (0.86, 0.88)	0.67 (0.64, 0.71)
1	0.3	100	300	-0.5	Tight Linkage	BayesC	0.51 (0.48, 0.55)	0.97 (0.97, 0.98)	0.72 (0.70, 0.74)	0.87 (0.86, 0.88)	0.71 (0.68, 0.74)
1	0.3	100	300	-0.5	Tight Linkage	RRBLUP	0.54 (0.51, 0.57)	1.00 (1.00, 1.00)	0.70 (0.68, 0.73)	0.88 (0.87, 0.89)	0.74 (0.71, 0.76)
1	0.3	100	300	-0.5	Pleiotropy	BayesC	0.39 (0.36, 0.42)	0.98 (0.97, 0.98)	0.72 (0.70, 0.75)	0.72 (0.70, 0.73)	0.52 (0.49, 0.55)
1	0.3	100	300	-0.5	Pleiotropy	RRBLUP	0.38 (0.35, 0.41)	1.00 (1.00, 1.00)	0.71 (0.69, 0.73)	0.72 (0.70, 0.73)	0.48 (0.45, 0.51)
1	0.3	100	300	0	Loose Linkage	BayesC	0.49 (0.45, 0.52)	0.98 (0.97, 0.98)	0.75 (0.73, 0.77)	0.87 (0.86, 0.88)	0.66 (0.63, 0.69)
1	0.3	100	300	0	Loose Linkage	RRBLUP	0.50 (0.47, 0.53)	1.00 (1.00, 1.00)	0.72 (0.70, 0.75)	0.88 (0.87, 0.89)	0.70 (0.67, 0.73)
1	0.3	100	300	0	Tight Linkage	BayesC	0.55 (0.52, 0.57)	0.98 (0.97, 0.98)	0.73 (0.70, 0.75)	0.87 (0.86, 0.88)	0.71 (0.68, 0.74)
1	0.3	100	300	0	Tight Linkage	RRBLUP	0.53 (0.49, 0.56)	1.00 (1.00, 1.00)	0.71 (0.69, 0.74)	0.88 (0.87, 0.89)	0.70 (0.66, 0.74)
1	0.3	100	300	0	Pleiotropy	BayesC	0.40 (0.37, 0.43)	0.98 (0.97, 0.98)	0.73 (0.71, 0.75)	0.70 (0.68, 0.71)	0.44 (0.41, 0.48)
1	0.3	100	300	0	Pleiotropy	RRBLUP	0.40 (0.37, 0.43)	1.00 (1.00, 1.00)	0.72 (0.70, 0.74)	0.71 (0.70, 0.73)	0.44 (0.41, 0.48)
1	0.3	100	300	0.5	Loose Linkage	BayesC	0.46 (0.43, 0.49)	0.98 (0.98, 0.98)	0.73 (0.71, 0.75)	0.85 (0.84, 0.86)	0.62 (0.59, 0.66)
1	0.3	100	300	0.5	Loose Linkage	RRBLUP	0.47 (0.44, 0.50)	1.00 (1.00, 1.00)	0.73 (0.71, 0.75)	0.88 (0.87, 0.89)	0.67 (0.63, 0.70)
1	0.3	100	300	0.5	Tight Linkage	BayesC	0.56 (0.53, 0.59)	0.97 (0.97, 0.98)	0.73 (0.71, 0.75)	0.86 (0.85, 0.88)	0.71 (0.68, 0.74)
1	0.3	100	300	0.5	Tight Linkage	RRBLUP	0.51 (0.48, 0.55)	1.00 (1.00, 1.00)	0.72 (0.70, 0.74)	0.88 (0.88, 0.89)	0.72 (0.69, 0.75)
1	0.3	100	300	0.5	Pleiotropy	BayesC	0.40 (0.37, 0.43)	0.98 (0.98, 0.98)	0.74 (0.72, 0.76)	0.71 (0.69, 0.73)	0.47 (0.44, 0.50)
1	0.3	100	300	0.5	Pleiotropy	RRBLUP	0.37 (0.33, 0.40)	1.00 (1.00, 1.00)	0.72 (0.70, 0.74)	0.72 (0.70, 0.74)	0.48 (0.44, 0.51)
1	0.3	100	450	-0.5	Loose Linkage	BayesC	0.51 (0.48, 0.54)	0.97 (0.97, 0.97)	0.77 (0.75, 0.78)	0.88 (0.88, 0.89)	0.69 (0.67, 0.72)
1	0.3	100	450	-0.5	Loose Linkage	RRBLUP	0.51 (0.48, 0.54)	1.00 (1.00, 1.00)	0.76 (0.74, 0.78)	0.89 (0.88, 0.90)	0.69 (0.66, 0.72)
1	0.3	100	450	-0.5	Tight Linkage	BayesC	0.57 (0.54, 0.61)	0.97 (0.97, 0.97)	0.78 (0.77, 0.80)	0.90 (0.89, 0.91)	0.75 (0.73, 0.78)
1	0.3	100	450	-0.5	Tight Linkage	RRBLUP	0.59 (0.56, 0.62)	1.00 (1.00, 1.00)	0.77 (0.75, 0.79)	0.90 (0.89, 0.91)	0.77 (0.74, 0.79)
1	0.3	100	450	-0.5	Pleiotropy	BayesC	0.44 (0.41, 0.47)	0.97 (0.97, 0.97)	0.78 (0.76, 0.80)	0.74 (0.72, 0.76)	0.51 (0.48, 0.54)
1	0.3	100	450	-0.5	Pleiotropy	RRBLUP	0.45 (0.42, 0.48)	1.00 (1.00, 1.00)	0.76 (0.74, 0.78)	0.75 (0.74, 0.77)	0.50 (0.47, 0.54)
1	0.3	100	450	0	Loose Linkage	BayesC	0.52 (0.49, 0.54)	0.97 (0.97, 0.97)	0.78 (0.76, 0.80)	0.88 (0.87, 0.89)	0.68 (0.65, 0.71)
1	0.3	100	450	0	Loose Linkage	RRBLUP	0.53 (0.49, 0.56)	1.00 (1.00, 1.00)	0.75 (0.74, 0.77)	0.90 (0.89, 0.91)	0.72 (0.70, 0.74)
1	0.3	100	450	0	Tight Linkage	BayesC	0.57 (0.54, 0.60)	0.97 (0.97, 0.97)	0.78 (0.77, 0.80)	0.88 (0.87, 0.89)	0.74 (0.72, 0.77)
1	0.3	100	450	0	Tight Linkage	RRBLUP	0.61 (0.58, 0.63)	1.00 (1.00, 1.00)	0.74 (0.72, 0.77)	0.90 (0.90, 0.91)	0.76 (0.73, 0.79)
1	0.3	100	450	0	Pleiotropy	BayesC	0.46 (0.43, 0.49)	0.97 (0.97, 0.97)	0.77 (0.75, 0.79)	0.75 (0.74, 0.76)	0.51 (0.48, 0.54)
1	0.3	100	450	0	Pleiotropy	RRBLUP	0.46 (0.43, 0.49)	1.00 (1.00, 1.00)	0.76 (0.75, 0.78)	0.72 (0.71, 0.74)	0.49 (0.46, 0.52)
1	0.3	100	450	0.5	Loose Linkage	BayesC	0.48 (0.45, 0.51)	0.97 (0.96, 0.97)	0.77 (0.75, 0.79)	0.88 (0.87, 0.89)	0.68 (0.65, 0.71)
1	0.3	100	450	0.5	Loose Linkage	RRBLUP	0.51 (0.48, 0.54)	1.00 (1.00, 1.00)	0.76 (0.74, 0.78)	0.89 (0.88, 0.90)	0.69 (0.66, 0.72)
1	0.3	100	450	0.5	Tight Linkage	BayesC	0.56 (0.53, 0.59)	0.97 (0.96, 0.97)	0.77 (0.75, 0.78)	0.89 (0.88, 0.90)	0.75 (0.72, 0.77)
1	0.3	100	450	0.5	Tight Linkage	RRBLUP	0.59 (0.56, 0.61)	1.00 (1.00, 1.00)	0.76 (0.74, 0.78)	0.90 (0.90, 0.91)	0.77 (0.75, 0.80)
1	0.3	100	450	0.5	Pleiotropy	BayesC	0.45 (0.42, 0.48)	0.97 (0.97, 0.97)	0.78 (0.77, 0.80)	0.75 (0.73, 0.76)	0.51 (0.48, 0.54)
1	0.3	100	450	0.5	Pleiotropy	RRBLUP	0.40 (0.37, 0.44)	1.00 (1.00, 1.00)	0.76 (0.74, 0.78)	0.74 (0.72, 0.76)	0.50 (0.47, 0.52)
1	0.3	100	600	-0.5	Loose Linkage	BayesC	0.55 (0.52, 0.58)	0.97 (0.97, 0.97)	0.81 (0.80, 0.83)	0.88 (0.87, 0.90)	0.71 (0.69, 0.74)
1	0.3	100	600	-0.5	Loose Linkage	RRBLUP	0.54 (0.51, 0.57)	0.99 (0.99, 1.00)	0.79 (0.78, 0.81)	0.91 (0.91, 0.92)	0.74 (0.72, 0.77)
1	0.3	100	600	-0.5	Tight Linkage	BayesC	0.60 (0.57, 0.63)	0.97 (0.97, 0.97)	0.81 (0.79, 0.82)	0.91 (0.90, 0.91)	0.77 (0.74, 0.80)
1	0.3	100	600	-0.5	Tight Linkage	RRBLUP	0.60 (0.57, 0.63)	0.99 (0.99, 1.00)	0.79 (0.78, 0.81)	0.91 (0.90, 0.92)	0.76 (0.73, 0.78)
1	0.3	100	600	-0.5	Pleiotropy	BayesC	0.49 (0.46, 0.53)	0.97 (0.97, 0.97)	0.82 (0.80, 0.83)	0.77 (0.76, 0.79)	0.54 (0.51, 0.57)
1	0.3	100	600	-0.5	Pleiotropy	RRBLUP	0.48 (0.45, 0.51)	1.00 (0.99, 1.00)	0.79 (0.77, 0.80)	0.76 (0.75, 0.78)	0.52 (0.49, 0.55)
1	0.3	100	600	0	Loose Linkage	BayesC	0.55 (0.52, 0.58)	0.97 (0.97, 0.97)	0.80 (0.79, 0.82)	0.90 (0.89, 0.91)	0.71 (0.69, 0.74)
1	0.3	100	600	0	Loose Linkage	RRBLUP	0.54 (0.50, 0.57)	1.00 (0.99, 1.00)	0.79 (0.77, 0.81)	0.91 (0.90, 0.92)	0.74 (0.72, 0.77)
1	0.3	100	600	0	Tight Linkage	BayesC	0.60 (0.58, 0.63)	0.97 (0.97, 0.97)	0.80 (0.78, 0.81)	0.90 (0.89, 0.90)	0.75 (0.72, 0.78)
1	0.3	100	600	0	Tight Linkage	RRBLUP	0.63 (0.60, 0.66)	0.99 (0.99, 1.00)	0.79 (0.78, 0.81)	0.91 (0.91, 0.92)	0.79 (0.76, 0.81)
1	0.3	100	600	0	Pleiotropy	BayesC	0.53 (0.50, 0.56)	0.97 (0.96, 0.97)	0.82 (0.80, 0.83)	0.76 (0.75, 0.78)	0.55 (0.52, 0.58)
1	0.3	100	600	0	Pleiotropy	RRBLUP	0.51 (0.48, 0.54)	0.99 (0.99, 1.00)	0.80 (0.78, 0.81)	0.76 (0.74, 0.78)	0.54 (0.51, 0.56)
1	0.3	100	600	0.5	Loose Linkage	BayesC	0.54 (0.51, 0.57)	0.97 (0.97, 0.97)	0.82 (0.80, 0.83)	0.89 (0.88, 0.90)	0.71 (0.68, 0.74)
1	0.3	100	600	0.5	Loose Linkage	RRBLUP	0.52 (0.49, 0.55)	1.00 (0.99, 1.00)	0.80 (0.78, 0.81)	0.90 (0.90, 0.91)	0.71 (0.69, 0.74)
1	0.3	100	600	0.5	Tight Linkage	BayesC	0.59 (0.56, 0.62)	0.96 (0.96, 0.97)	0.81 (0.80, 0.83)	0.90 (0.89, 0.91)	0.77 (0.74, 0.79)
1	0.3	100	600	0.5	Tight Linkage	RRBLUP	0.61 (0.58, 0.64)	0.99 (0.99, 1.00)	0.79 (0.78, 0.81)	0.91 (0.91, 0.92)	0.78 (0.75, 0.80)
1	0.3	100	600	0.5	Pleiotropy	BayesC	0.51 (0.48, 0.55)	0.96 (0.96, 0.97)	0.81 (0.80, 0.83)	0.76 (0.74, 0.78)	0.54 (0.51, 0.57)
1	0.3	100	600	0.5	Pleiotropy	RRBLUP	0.49 (0.46, 0.52)	1.00 (0.99, 1.00)	0.79 (0.78, 0.81)	0.76 (0.75, 0.78)	0.51 (0.49, 0.54)
1	0.6	30	150	-0.5	Loose Linkage	BayesC	0.41 (0.37, 0.45)	0.97 (0.97, 0.98)	0.66 (0.63, 0.69)	0.88 (0.87, 0.89)	0.65 (0.62, 0.68)
1	0.6	30	150	-0.5	Loose Linkage	RRBLUP	0.42 (0.38, 0.45)	1.00 (1.00, 1.00)	0.67 (0.64, 0.69)	0.88 (0.87, 0.89)	0.63 (0.60, 0.67)
1	0.6	30	150	-0.5	Tight Linkage	BayesC	0.50 (0.46, 0.53)	0.97 (0.96, 0.97)	0.65 (0.62, 0.68)	0.89 (0.88, 0.89)	0.69 (0.66, 0.72)
1	0.6	30	150	-0.5	Tight Linkage	RRBLUP	0.47 (0.44, 0.51)	1.00 (1.00, 1.00)	0.66 (0.63, 0.68)	0.89 (0.88, 0.90)	0.72 (0.69, 0.75)
1	0.6	30	150	-0.5	Pleiotropy	BayesC	0.39 (0.36, 0.43)	0.97 (0.96, 0.97)	0.63 (0.60, 0.66)	0.82 (0.81, 0.83)	0.49 (0.46, 0.53)
1	0.6	30	150	-0.5	Pleiotropy	RRBLUP	0.41 (0.38, 0.44)	1.00 (1.00, 1.00)	0.64 (0.62, 0.67)	0.83 (0.82, 0.84)	0.49 (0.45, 0.52)
1	0.6	30	150	0	Loose Linkage	BayesC	0.43 (0.39, 0.46)	0.97 (0.97, 0.98)	0.65 (0.62, 0.68)	0.88 (0.88, 0.89)	0.65 (0.62, 0.67)
1	0.6	30	150	0	Loose Linkage	RRBLUP	0.41 (0.38, 0.45)	1.00 (1.00, 1.00)	0.63 (0.61, 0.66)	0.87 (0.86, 0.88)	0.60 (0.56, 0.63)
1	0.6	30	150	0	Tight Linkage	BayesC	0.50 (0.46, 0.54)	0.97 (0.97, 0.97)	0.65 (0.62, 0.68)	0.88 (0.87, 0.89)	0.70 (0.66, 0.74)
1	0.6	30	150	0	Tight Linkage	RRBLUP	0.50 (0.46, 0.54)	1.00 (1.00, 1.00)	0.60 (0.57, 0.63)	0.89 (0.88, 0.89)	0.68 (0.65, 0.71)
1	0.6	30	150	0	Pleiotropy	BayesC	0.46 (0.43, 0.50)	0.97 (0.97, 0.97)	0.65 (0.62, 0.68)	0.82 (0.81, 0.84)	0.50 (0.46, 0.53)
1	0.6	30	150	0	Pleiotropy	RRBLUP	0.45 (0.41, 0.48)	1.00 (1.00, 1.00)	0.62 (0.59, 0.64)	0.83 (0.82, 0.84)	0.50 (0.47, 0.54)
1	0.6	30	150	0.5	Loose Linkage	BayesC	0.44 (0.41, 0.48)	0.97 (0.97, 0.97)	0.67 (0.64, 0.70)	0.89 (0.88, 0.90)	0.64 (0.61, 0.68)
1	0.6	30	150	0.5	Loose Linkage	RRBLUP	0.44 (0.40, 0.47)	1.00 (1.00, 1.00)	0.66 (0.63, 0.69)	0.89 (0.88, 0.89)	0.64 (0.61, 0.68)
1	0.6	30	150	0.5	Tight Linkage	BayesC	0.49 (0.46, 0.53)	0.97 (0.97, 0.97)	0.62 (0.59, 0.65)	0.88 (0.87, 0.89)	0.67 (0.63, 0.70)
1	0.6	30	150	0.5	Tight Linkage	RRBLUP	0.50 (0.47, 0.54)	1.00 (1.00, 1.00)	0.65 (0.63, 0.68)	0.89 (0.88, 0.90)	0.68 (0.65, 0.72)
1	0.6	30	150	0.5	Pleiotropy	BayesC	0.41 (0.38, 0.45)	0.97 (0.96, 0.97)	0.63 (0.61, 0.66)	0.83 (0.81, 0.84)	0.48 (0.45, 0.51)
1	0.6	30	150	0.5	Pleiotropy	RRBLUP	0.39 (0.35, 0.42)	1.00 (0.99, 1.00)	0.63 (0.60, 0.66)	0.84 (0.82, 0.85)	0.46 (0.42, 0.49)
1	0.6	30	300	-0.5	Loose Linkage	BayesC	0.51 (0.48, 0.54)	0.94 (0.93, 0.94)	0.79 (0.77, 0.81)	0.90 (0.89, 0.91)	0.72 (0.69, 0.74)
1	0.6	30	300	-0.5	Loose Linkage	RRBLUP	0.47 (0.43, 0.51)	1.00 (1.00, 1.00)	0.71 (0.69, 0.73)	0.90 (0.90, 0.91)	0.69 (0.66, 0.72)
1	0.6	30	300	-0.5	Tight Linkage	BayesC	0.59 (0.55, 0.62)	0.93 (0.93, 0.94)	0.77 (0.75, 0.79)	0.90 (0.89, 0.91)	0.74 (0.71, 0.76)
1	0.6	30	300	-0.5	Tight Linkage	RRBLUP	0.56 (0.53, 0.59)	1.00 (1.00, 1.00)	0.73 (0.71, 0.75)	0.90 (0.89, 0.91)	0.71 (0.68, 0.74)
1	0.6	30	300	-0.5	Pleiotropy	BayesC	0.54 (0.51, 0.58)	0.93 (0.93, 0.94)	0.80 (0.78, 0.82)	0.85 (0.85, 0.86)	0.61 (0.58, 0.64)
1	0.6	30	300	-0.5	Pleiotropy	RRBLUP	0.51 (0.47, 0.54)	1.00 (1.00, 1.00)	0.73 (0.71, 0.75)	0.84 (0.83, 0.85)	0.56 (0.53, 0.59)
1	0.6	30	300	0	Loose Linkage	BayesC	0.51 (0.48, 0.55)	0.93 (0.92, 0.94)	0.80 (0.78, 0.81)	0.90 (0.89, 0.91)	0.69 (0.66, 0.72)
1	0.6	30	300	0	Loose Linkage	RRBLUP	0.44 (0.41, 0.48)	1.00 (1.00, 1.00)	0.71 (0.69, 0.74)	0.90 (0.89, 0.91)	0.67 (0.64, 0.70)
1	0.6	30	300	0	Tight Linkage	BayesC	0.56 (0.53, 0.60)	0.93 (0.92, 0.94)	0.78 (0.76, 0.80)	0.90 (0.89, 0.91)	0.75 (0.72, 0.78)
1	0.6	30	300	0	Tight Linkage	RRBLUP	0.59 (0.55, 0.62)	1.00 (1.00, 1.00)	0.73 (0.70, 0.75)	0.90 (0.90, 0.91)	0.73 (0.70, 0.76)
1	0.6	30	300	0	Pleiotropy	BayesC	0.59 (0.56, 0.62)	0.93 (0.93, 0.94)	0.77 (0.75, 0.79)	0.85 (0.84, 0.86)	0.59 (0.56, 0.62)
1	0.6	30	300	0	Pleiotropy	RRBLUP	0.55 (0.52, 0.58)	1.00 (1.00, 1.00)	0.74 (0.72, 0.76)	0.85 (0.84, 0.86)	0.57 (0.53, 0.60)
1	0.6	30	300	0.5	Loose Linkage	BayesC	0.50 (0.46, 0.54)	0.93 (0.92, 0.94)	0.79 (0.77, 0.81)	0.91 (0.90, 0.91)	0.69 (0.66, 0.72)
1	0.6	30	300	0.5	Loose Linkage	RRBLUP	0.48 (0.45, 0.51)	1.00 (1.00, 1.00)	0.72 (0.69, 0.74)	0.90 (0.89, 0.90)	0.66 (0.63, 0.69)
1	0.6	30	300	0.5	Tight Linkage	BayesC	0.58 (0.55, 0.61)	0.93 (0.93, 0.94)	0.80 (0.78, 0.82)	0.90 (0.90, 0.91)	0.74 (0.71, 0.77)
1	0.6	30	300	0.5	Tight Linkage	RRBLUP	0.53 (0.50, 0.57)	1.00 (0.99, 1.00)	0.71 (0.69, 0.73)	0.90 (0.89, 0.91)	0.70 (0.68, 0.73)
1	0.6	30	300	0.5	Pleiotropy	BayesC	0.55 (0.52, 0.58)	0.92 (0.92, 0.93)	0.79 (0.77, 0.81)	0.86 (0.85, 0.87)	0.62 (0.59, 0.65)
1	0.6	30	300	0.5	Pleiotropy	RRBLUP	0.49 (0.46, 0.52)	1.00 (1.00, 1.00)	0.71 (0.69, 0.73)	0.85 (0.84, 0.86)	0.57 (0.54, 0.60)
1	0.6	30	450	-0.5	Loose Linkage	BayesC	0.53 (0.49, 0.56)	0.93 (0.92, 0.93)	0.82 (0.80, 0.84)	0.91 (0.90, 0.92)	0.75 (0.72, 0.78)
1	0.6	30	450	-0.5	Loose Linkage	RRBLUP	0.51 (0.48, 0.54)	1.00 (1.00, 1.00)	0.76 (0.74, 0.77)	0.91 (0.90, 0.91)	0.71 (0.68, 0.74)
1	0.6	30	450	-0.5	Tight Linkage	BayesC	0.63 (0.60, 0.66)	0.93 (0.92, 0.94)	0.83 (0.81, 0.84)	0.92 (0.91, 0.93)	0.79 (0.77, 0.82)
1	0.6	30	450	-0.5	Tight Linkage	RRBLUP	0.61 (0.58, 0.64)	1.00 (0.99, 1.00)	0.75 (0.73, 0.77)	0.91 (0.91, 0.92)	0.75 (0.73, 0.78)
1	0.6	30	450	-0.5	Pleiotropy	BayesC	0.57 (0.53, 0.60)	0.93 (0.92, 0.93)	0.80 (0.78, 0.82)	0.85 (0.84, 0.86)	0.66 (0.63, 0.69)
1	0.6	30	450	-0.5	Pleiotropy	RRBLUP	0.58 (0.55, 0.60)	1.00 (1.00, 1.00)	0.78 (0.76, 0.80)	0.86 (0.85, 0.87)	0.61 (0.58, 0.64)
1	0.6	30	450	0	Loose Linkage	BayesC	0.54 (0.50, 0.57)	0.93 (0.93, 0.94)	0.82 (0.80, 0.84)	0.90 (0.89, 0.91)	0.74 (0.71, 0.77)
1	0.6	30	450	0	Loose Linkage	RRBLUP	0.52 (0.49, 0.55)	1.00 (0.99, 1.00)	0.79 (0.78, 0.81)	0.91 (0.90, 0.91)	0.71 (0.69, 0.74)
1	0.6	30	450	0	Tight Linkage	BayesC	0.65 (0.62, 0.67)	0.93 (0.92, 0.94)	0.80 (0.78, 0.82)	0.92 (0.91, 0.92)	0.79 (0.77, 0.82)
1	0.6	30	450	0	Tight Linkage	RRBLUP	0.61 (0.58, 0.64)	1.00 (0.99, 1.00)	0.77 (0.75, 0.79)	0.92 (0.91, 0.92)	0.74 (0.71, 0.77)
1	0.6	30	450	0	Pleiotropy	BayesC	0.64 (0.62, 0.67)	0.93 (0.92, 0.94)	0.84 (0.82, 0.85)	0.86 (0.85, 0.87)	0.68 (0.65, 0.70)
1	0.6	30	450	0	Pleiotropy	RRBLUP	0.59 (0.56, 0.62)	1.00 (1.00, 1.00)	0.77 (0.75, 0.79)	0.86 (0.85, 0.86)	0.60 (0.57, 0.63)
1	0.6	30	450	0.5	Loose Linkage	BayesC	0.56 (0.53, 0.59)	0.93 (0.93, 0.94)	0.82 (0.81, 0.84)	0.91 (0.91, 0.92)	0.75 (0.72, 0.78)
1	0.6	30	450	0.5	Loose Linkage	RRBLUP	0.51 (0.48, 0.54)	1.00 (1.00, 1.00)	0.77 (0.75, 0.80)	0.91 (0.91, 0.92)	0.72 (0.69, 0.75)
1	0.6	30	450	0.5	Tight Linkage	BayesC	0.65 (0.63, 0.68)	0.93 (0.92, 0.94)	0.81 (0.79, 0.83)	0.92 (0.91, 0.93)	0.80 (0.77, 0.82)
1	0.6	30	450	0.5	Tight Linkage	RRBLUP	0.59 (0.56, 0.62)	1.00 (1.00, 1.00)	0.76 (0.74, 0.78)	0.91 (0.90, 0.91)	0.72 (0.69, 0.75)
1	0.6	30	450	0.5	Pleiotropy	BayesC	0.59 (0.56, 0.62)	0.93 (0.92, 0.94)	0.81 (0.80, 0.83)	0.86 (0.85, 0.87)	0.65 (0.63, 0.68)
1	0.6	30	450	0.5	Pleiotropy	RRBLUP	0.56 (0.53, 0.59)	1.00 (1.00, 1.00)	0.76 (0.74, 0.78)	0.87 (0.86, 0.88)	0.61 (0.58, 0.64)
1	0.6	30	600	-0.5	Loose Linkage	BayesC	0.58 (0.55, 0.61)	0.93 (0.92, 0.93)	0.83 (0.81, 0.84)	0.92 (0.91, 0.92)	0.76 (0.73, 0.78)
1	0.6	30	600	-0.5	Loose Linkage	RRBLUP	0.54 (0.51, 0.57)	0.99 (0.99, 1.00)	0.79 (0.77, 0.81)	0.92 (0.91, 0.92)	0.70 (0.67, 0.73)
1	0.6	30	600	-0.5	Tight Linkage	BayesC	0.65 (0.63, 0.68)	0.93 (0.93, 0.94)	0.82 (0.81, 0.84)	0.92 (0.91, 0.93)	0.82 (0.79, 0.84)
1	0.6	30	600	-0.5	Tight Linkage	RRBLUP	0.66 (0.63, 0.69)	0.99 (0.99, 1.00)	0.80 (0.78, 0.82)	0.92 (0.92, 0.93)	0.79 (0.77, 0.82)
1	0.6	30	600	-0.5	Pleiotropy	BayesC	0.63 (0.60, 0.66)	0.93 (0.93, 0.94)	0.83 (0.81, 0.84)	0.87 (0.86, 0.88)	0.72 (0.69, 0.74)
1	0.6	30	600	-0.5	Pleiotropy	RRBLUP	0.59 (0.56, 0.63)	1.00 (0.99, 1.00)	0.81 (0.79, 0.82)	0.87 (0.86, 0.88)	0.65 (0.62, 0.68)
1	0.6	30	600	0	Loose Linkage	BayesC	0.60 (0.57, 0.63)	0.94 (0.93, 0.94)	0.82 (0.80, 0.84)	0.92 (0.91, 0.92)	0.77 (0.75, 0.80)
1	0.6	30	600	0	Loose Linkage	RRBLUP	0.56 (0.53, 0.59)	0.99 (0.99, 1.00)	0.79 (0.77, 0.81)	0.92 (0.91, 0.92)	0.71 (0.68, 0.73)
1	0.6	30	600	0	Tight Linkage	BayesC	0.68 (0.65, 0.71)	0.93 (0.92, 0.93)	0.83 (0.81, 0.84)	0.91 (0.91, 0.92)	0.81 (0.79, 0.83)
1	0.6	30	600	0	Tight Linkage	RRBLUP	0.66 (0.63, 0.69)	0.99 (0.99, 1.00)	0.78 (0.76, 0.80)	0.92 (0.91, 0.93)	0.78 (0.76, 0.80)
1	0.6	30	600	0	Pleiotropy	BayesC	0.68 (0.65, 0.70)	0.93 (0.93, 0.94)	0.84 (0.83, 0.85)	0.86 (0.85, 0.87)	0.72 (0.70, 0.74)
1	0.6	30	600	0	Pleiotropy	RRBLUP	0.65 (0.62, 0.67)	1.00 (0.99, 1.00)	0.80 (0.78, 0.82)	0.87 (0.87, 0.88)	0.66 (0.63, 0.68)
1	0.6	30	600	0.5	Loose Linkage	BayesC	0.60 (0.57, 0.63)	0.93 (0.92, 0.93)	0.82 (0.81, 0.84)	0.92 (0.91, 0.92)	0.78 (0.76, 0.80)
1	0.6	30	600	0.5	Loose Linkage	RRBLUP	0.57 (0.54, 0.60)	1.00 (0.99, 1.00)	0.80 (0.78, 0.82)	0.92 (0.91, 0.92)	0.74 (0.71, 0.76)
1	0.6	30	600	0.5	Tight Linkage	BayesC	0.67 (0.64, 0.70)	0.93 (0.93, 0.94)	0.82 (0.80, 0.83)	0.92 (0.91, 0.93)	0.81 (0.78, 0.83)
1	0.6	30	600	0.5	Tight Linkage	RRBLUP	0.65 (0.62, 0.67)	0.99 (0.99, 1.00)	0.79 (0.77, 0.81)	0.92 (0.92, 0.93)	0.77 (0.74, 0.79)
1	0.6	30	600	0.5	Pleiotropy	BayesC	0.64 (0.61, 0.66)	0.93 (0.92, 0.94)	0.81 (0.79, 0.83)	0.86 (0.85, 0.87)	0.72 (0.69, 0.75)
1	0.6	30	600	0.5	Pleiotropy	RRBLUP	0.59 (0.56, 0.62)	1.00 (0.99, 1.00)	0.81 (0.79, 0.82)	0.88 (0.87, 0.88)	0.64 (0.61, 0.67)
1	0.6	100	150	-0.5	Loose Linkage	BayesC	0.47 (0.44, 0.50)	0.98 (0.97, 0.98)	0.60 (0.58, 0.63)	0.91 (0.90, 0.92)	0.69 (0.67, 0.72)
1	0.6	100	150	-0.5	Loose Linkage	RRBLUP	0.44 (0.41, 0.47)	1.00 (1.00, 1.00)	0.65 (0.62, 0.68)	0.91 (0.90, 0.91)	0.71 (0.69, 0.74)
1	0.6	100	150	-0.5	Tight Linkage	BayesC	0.54 (0.51, 0.57)	0.97 (0.97, 0.98)	0.62 (0.59, 0.64)	0.91 (0.91, 0.92)	0.78 (0.76, 0.80)
1	0.6	100	150	-0.5	Tight Linkage	RRBLUP	0.55 (0.52, 0.58)	1.00 (1.00, 1.00)	0.63 (0.61, 0.65)	0.91 (0.90, 0.92)	0.77 (0.74, 0.80)
1	0.6	100	150	-0.5	Pleiotropy	BayesC	0.38 (0.35, 0.42)	0.97 (0.97, 0.98)	0.63 (0.60, 0.66)	0.82 (0.82, 0.83)	0.53 (0.50, 0.55)
1	0.6	100	150	-0.5	Pleiotropy	RRBLUP	0.40 (0.36, 0.43)	1.00 (0.99, 1.00)	0.63 (0.61, 0.66)	0.83 (0.82, 0.85)	0.50 (0.47, 0.53)
1	0.6	100	150	0	Loose Linkage	BayesC	0.46 (0.43, 0.49)	0.98 (0.97, 0.98)	0.58 (0.56, 0.61)	0.91 (0.90, 0.91)	0.72 (0.69, 0.74)
1	0.6	100	150	0	Loose Linkage	RRBLUP	0.51 (0.48, 0.54)	1.00 (1.00, 1.00)	0.66 (0.64, 0.69)	0.91 (0.90, 0.91)	0.73 (0.71, 0.75)
1	0.6	100	150	0	Tight Linkage	BayesC	0.51 (0.48, 0.54)	0.97 (0.97, 0.98)	0.61 (0.58, 0.64)	0.91 (0.90, 0.92)	0.76 (0.73, 0.78)
1	0.6	100	150	0	Tight Linkage	RRBLUP	0.55 (0.51, 0.58)	1.00 (1.00, 1.00)	0.63 (0.60, 0.65)	0.90 (0.89, 0.91)	0.75 (0.72, 0.78)
1	0.6	100	150	0	Pleiotropy	BayesC	0.41 (0.38, 0.44)	0.98 (0.97, 0.98)	0.59 (0.56, 0.62)	0.83 (0.82, 0.84)	0.47 (0.44, 0.51)
1	0.6	100	150	0	Pleiotropy	RRBLUP	0.37 (0.34, 0.41)	1.00 (1.00, 1.00)	0.65 (0.62, 0.68)	0.82 (0.81, 0.83)	0.46 (0.42, 0.49)
1	0.6	100	150	0.5	Loose Linkage	BayesC	0.46 (0.43, 0.50)	0.97 (0.97, 0.98)	0.61 (0.58, 0.64)	0.90 (0.89, 0.91)	0.71 (0.68, 0.73)
1	0.6	100	150	0.5	Loose Linkage	RRBLUP	0.46 (0.43, 0.50)	1.00 (1.00, 1.00)	0.62 (0.60, 0.65)	0.90 (0.90, 0.91)	0.73 (0.70, 0.75)
1	0.6	100	150	0.5	Tight Linkage	BayesC	0.51 (0.48, 0.55)	0.97 (0.97, 0.98)	0.61 (0.58, 0.64)	0.91 (0.90, 0.92)	0.77 (0.74, 0.79)
1	0.6	100	150	0.5	Tight Linkage	RRBLUP	0.52 (0.49, 0.55)	1.00 (1.00, 1.00)	0.62 (0.60, 0.65)	0.91 (0.91, 0.92)	0.77 (0.74, 0.79)
1	0.6	100	150	0.5	Pleiotropy	BayesC	0.40 (0.37, 0.43)	0.97 (0.97, 0.98)	0.60 (0.57, 0.63)	0.82 (0.81, 0.84)	0.49 (0.47, 0.52)
1	0.6	100	150	0.5	Pleiotropy	RRBLUP	0.40 (0.37, 0.44)	1.00 (1.00, 1.00)	0.65 (0.63, 0.68)	0.83 (0.82, 0.84)	0.50 (0.47, 0.53)
1	0.6	100	300	-0.5	Loose Linkage	BayesC	0.54 (0.51, 0.56)	0.98 (0.97, 0.98)	0.72 (0.70, 0.74)	0.92 (0.92, 0.93)	0.75 (0.73, 0.78)
1	0.6	100	300	-0.5	Loose Linkage	RRBLUP	0.54 (0.51, 0.57)	1.00 (1.00, 1.00)	0.70 (0.68, 0.72)	0.93 (0.92, 0.93)	0.76 (0.73, 0.78)
1	0.6	100	300	-0.5	Tight Linkage	BayesC	0.62 (0.59, 0.65)	0.97 (0.97, 0.98)	0.73 (0.70, 0.75)	0.92 (0.92, 0.93)	0.80 (0.77, 0.82)
1	0.6	100	300	-0.5	Tight Linkage	RRBLUP	0.62 (0.58, 0.65)	1.00 (1.00, 1.00)	0.70 (0.68, 0.72)	0.93 (0.92, 0.94)	0.80 (0.77, 0.82)
1	0.6	100	300	-0.5	Pleiotropy	BayesC	0.48 (0.45, 0.51)	0.98 (0.97, 0.98)	0.72 (0.70, 0.74)	0.86 (0.85, 0.86)	0.57 (0.55, 0.60)
1	0.6	100	300	-0.5	Pleiotropy	RRBLUP	0.48 (0.45, 0.51)	1.00 (1.00, 1.00)	0.73 (0.71, 0.75)	0.85 (0.84, 0.86)	0.55 (0.53, 0.58)
1	0.6	100	300	0	Loose Linkage	BayesC	0.54 (0.52, 0.57)	0.98 (0.97, 0.98)	0.71 (0.69, 0.74)	0.93 (0.92, 0.93)	0.76 (0.74, 0.79)
1	0.6	100	300	0	Loose Linkage	RRBLUP	0.52 (0.49, 0.55)	1.00 (1.00, 1.00)	0.70 (0.67, 0.72)	0.93 (0.92, 0.93)	0.75 (0.72, 0.78)
1	0.6	100	300	0	Tight Linkage	BayesC	0.60 (0.58, 0.63)	0.98 (0.98, 0.98)	0.70 (0.68, 0.73)	0.93 (0.92, 0.94)	0.81 (0.79, 0.83)
1	0.6	100	300	0	Tight Linkage	RRBLUP	0.62 (0.60, 0.65)	1.00 (1.00, 1.00)	0.70 (0.68, 0.73)	0.93 (0.93, 0.94)	0.82 (0.79, 0.84)
1	0.6	100	300	0	Pleiotropy	BayesC	0.51 (0.48, 0.54)	0.98 (0.97, 0.98)	0.73 (0.72, 0.75)	0.85 (0.84, 0.86)	0.61 (0.58, 0.64)
1	0.6	100	300	0	Pleiotropy	RRBLUP	0.52 (0.48, 0.55)	1.00 (1.00, 1.00)	0.71 (0.69, 0.73)	0.85 (0.84, 0.86)	0.57 (0.54, 0.60)
1	0.6	100	300	0.5	Loose Linkage	BayesC	0.52 (0.49, 0.55)	0.98 (0.97, 0.98)	0.74 (0.72, 0.76)	0.92 (0.92, 0.93)	0.76 (0.74, 0.78)
1	0.6	100	300	0.5	Loose Linkage	RRBLUP	0.54 (0.52, 0.57)	1.00 (1.00, 1.00)	0.72 (0.70, 0.74)	0.93 (0.92, 0.93)	0.74 (0.72, 0.77)
1	0.6	100	300	0.5	Tight Linkage	BayesC	0.60 (0.58, 0.63)	0.98 (0.98, 0.98)	0.72 (0.70, 0.75)	0.94 (0.93, 0.94)	0.82 (0.80, 0.84)
1	0.6	100	300	0.5	Tight Linkage	RRBLUP	0.57 (0.55, 0.60)	1.00 (1.00, 1.00)	0.71 (0.69, 0.73)	0.93 (0.92, 0.93)	0.80 (0.77, 0.82)
1	0.6	100	300	0.5	Pleiotropy	BayesC	0.49 (0.46, 0.52)	0.98 (0.97, 0.98)	0.72 (0.70, 0.74)	0.86 (0.85, 0.87)	0.57 (0.55, 0.60)
1	0.6	100	300	0.5	Pleiotropy	RRBLUP	0.49 (0.46, 0.52)	1.00 (1.00, 1.00)	0.72 (0.70, 0.74)	0.86 (0.85, 0.87)	0.56 (0.53, 0.58)
1	0.6	100	450	-0.5	Loose Linkage	BayesC	0.59 (0.57, 0.62)	0.97 (0.97, 0.97)	0.80 (0.78, 0.81)	0.93 (0.93, 0.94)	0.77 (0.75, 0.79)
1	0.6	100	450	-0.5	Loose Linkage	RRBLUP	0.60 (0.57, 0.62)	1.00 (1.00, 1.00)	0.76 (0.75, 0.78)	0.93 (0.93, 0.94)	0.77 (0.75, 0.79)
1	0.6	100	450	-0.5	Tight Linkage	BayesC	0.64 (0.62, 0.67)	0.97 (0.97, 0.97)	0.79 (0.77, 0.81)	0.94 (0.94, 0.95)	0.83 (0.81, 0.85)
1	0.6	100	450	-0.5	Tight Linkage	RRBLUP	0.64 (0.62, 0.67)	1.00 (1.00, 1.00)	0.76 (0.74, 0.78)	0.94 (0.94, 0.95)	0.82 (0.80, 0.84)
1	0.6	100	450	-0.5	Pleiotropy	BayesC	0.56 (0.54, 0.59)	0.97 (0.97, 0.97)	0.79 (0.77, 0.81)	0.85 (0.84, 0.86)	0.62 (0.59, 0.64)
1	0.6	100	450	-0.5	Pleiotropy	RRBLUP	0.52 (0.49, 0.55)	1.00 (1.00, 1.00)	0.73 (0.71, 0.75)	0.86 (0.85, 0.87)	0.61 (0.58, 0.63)
1	0.6	100	450	0	Loose Linkage	BayesC	0.60 (0.57, 0.62)	0.97 (0.96, 0.97)	0.79 (0.77, 0.81)	0.94 (0.93, 0.94)	0.79 (0.77, 0.81)
1	0.6	100	450	0	Loose Linkage	RRBLUP	0.56 (0.53, 0.59)	1.00 (1.00, 1.00)	0.76 (0.74, 0.77)	0.94 (0.93, 0.95)	0.79 (0.77, 0.81)
1	0.6	100	450	0	Tight Linkage	BayesC	0.68 (0.65, 0.70)	0.97 (0.97, 0.97)	0.77 (0.75, 0.79)	0.94 (0.94, 0.95)	0.85 (0.83, 0.87)
1	0.6	100	450	0	Tight Linkage	RRBLUP	0.68 (0.66, 0.71)	1.00 (1.00, 1.00)	0.76 (0.74, 0.78)	0.95 (0.94, 0.95)	0.83 (0.81, 0.85)
1	0.6	100	450	0	Pleiotropy	BayesC	0.58 (0.56, 0.61)	0.97 (0.97, 0.97)	0.79 (0.78, 0.81)	0.85 (0.84, 0.86)	0.61 (0.58, 0.63)
1	0.6	100	450	0	Pleiotropy	RRBLUP	0.55 (0.52, 0.57)	1.00 (1.00, 1.00)	0.77 (0.75, 0.79)	0.86 (0.85, 0.87)	0.61 (0.59, 0.64)
1	0.6	100	450	0.5	Loose Linkage	BayesC	0.59 (0.56, 0.61)	0.97 (0.96, 0.97)	0.79 (0.77, 0.80)	0.93 (0.92, 0.94)	0.79 (0.77, 0.81)
1	0.6	100	450	0.5	Loose Linkage	RRBLUP	0.57 (0.54, 0.59)	1.00 (1.00, 1.00)	0.76 (0.74, 0.78)	0.94 (0.93, 0.94)	0.78 (0.76, 0.80)
1	0.6	100	450	0.5	Tight Linkage	BayesC	0.67 (0.65, 0.69)	0.97 (0.97, 0.97)	0.77 (0.75, 0.79)	0.94 (0.94, 0.95)	0.85 (0.83, 0.86)
1	0.6	100	450	0.5	Tight Linkage	RRBLUP	0.63 (0.60, 0.66)	1.00 (1.00, 1.00)	0.75 (0.73, 0.77)	0.94 (0.94, 0.95)	0.82 (0.80, 0.84)
1	0.6	100	450	0.5	Pleiotropy	BayesC	0.57 (0.54, 0.59)	0.97 (0.97, 0.97)	0.80 (0.79, 0.82)	0.87 (0.86, 0.87)	0.65 (0.62, 0.67)
1	0.6	100	450	0.5	Pleiotropy	RRBLUP	0.54 (0.51, 0.56)	1.00 (1.00, 1.00)	0.78 (0.77, 0.80)	0.85 (0.85, 0.86)	0.61 (0.59, 0.64)
1	0.6	100	600	-0.5	Loose Linkage	BayesC	0.60 (0.57, 0.62)	0.97 (0.96, 0.97)	0.81 (0.79, 0.83)	0.94 (0.93, 0.94)	0.81 (0.79, 0.83)
1	0.6	100	600	-0.5	Loose Linkage	RRBLUP	0.64 (0.61, 0.66)	1.00 (0.99, 1.00)	0.80 (0.79, 0.82)	0.95 (0.94, 0.95)	0.81 (0.79, 0.83)
1	0.6	100	600	-0.5	Tight Linkage	BayesC	0.68 (0.65, 0.70)	0.97 (0.96, 0.97)	0.81 (0.79, 0.82)	0.95 (0.94, 0.95)	0.86 (0.85, 0.88)
1	0.6	100	600	-0.5	Tight Linkage	RRBLUP	0.67 (0.65, 0.70)	0.99 (0.99, 1.00)	0.78 (0.76, 0.80)	0.95 (0.95, 0.95)	0.84 (0.82, 0.86)
1	0.6	100	600	-0.5	Pleiotropy	BayesC	0.58 (0.55, 0.61)	0.97 (0.96, 0.97)	0.82 (0.81, 0.84)	0.85 (0.84, 0.86)	0.68 (0.65, 0.70)
1	0.6	100	600	-0.5	Pleiotropy	RRBLUP	0.58 (0.55, 0.60)	1.00 (0.99, 1.00)	0.79 (0.77, 0.80)	0.88 (0.87, 0.88)	0.63 (0.60, 0.65)
1	0.6	100	600	0	Loose Linkage	BayesC	0.61 (0.59, 0.64)	0.97 (0.96, 0.97)	0.81 (0.79, 0.82)	0.94 (0.94, 0.95)	0.81 (0.79, 0.83)
1	0.6	100	600	0	Loose Linkage	RRBLUP	0.61 (0.59, 0.64)	1.00 (0.99, 1.00)	0.79 (0.77, 0.81)	0.94 (0.94, 0.95)	0.81 (0.79, 0.83)
1	0.6	100	600	0	Tight Linkage	BayesC	0.68 (0.65, 0.70)	0.97 (0.96, 0.97)	0.82 (0.81, 0.83)	0.95 (0.94, 0.95)	0.85 (0.83, 0.87)
1	0.6	100	600	0	Tight Linkage	RRBLUP	0.69 (0.66, 0.71)	0.99 (0.99, 1.00)	0.80 (0.78, 0.81)	0.94 (0.94, 0.95)	0.84 (0.83, 0.86)
1	0.6	100	600	0	Pleiotropy	BayesC	0.61 (0.59, 0.64)	0.97 (0.96, 0.97)	0.82 (0.81, 0.84)	0.87 (0.87, 0.88)	0.67 (0.65, 0.69)
1	0.6	100	600	0	Pleiotropy	RRBLUP	0.59 (0.57, 0.62)	0.99 (0.99, 1.00)	0.78 (0.76, 0.80)	0.87 (0.86, 0.88)	0.65 (0.63, 0.68)
1	0.6	100	600	0.5	Loose Linkage	BayesC	0.63 (0.61, 0.65)	0.97 (0.96, 0.97)	0.81 (0.79, 0.82)	0.94 (0.93, 0.94)	0.80 (0.78, 0.82)
1	0.6	100	600	0.5	Loose Linkage	RRBLUP	0.61 (0.59, 0.64)	1.00 (0.99, 1.00)	0.80 (0.78, 0.82)	0.94 (0.94, 0.95)	0.80 (0.78, 0.82)
1	0.6	100	600	0.5	Tight Linkage	BayesC	0.68 (0.66, 0.71)	0.97 (0.97, 0.97)	0.81 (0.79, 0.82)	0.95 (0.94, 0.95)	0.85 (0.83, 0.87)
1	0.6	100	600	0.5	Tight Linkage	RRBLUP	0.67 (0.64, 0.69)	0.99 (0.99, 1.00)	0.79 (0.78, 0.81)	0.95 (0.95, 0.95)	0.86 (0.85, 0.88)
1	0.6	100	600	0.5	Pleiotropy	BayesC	0.58 (0.56, 0.61)	0.96 (0.96, 0.97)	0.81 (0.80, 0.83)	0.86 (0.85, 0.87)	0.66 (0.63, 0.68)
1	0.6	100	600	0.5	Pleiotropy	RRBLUP	0.59 (0.56, 0.62)	0.99 (0.99, 1.00)	0.78 (0.77, 0.80)	0.86 (0.85, 0.87)	0.63 (0.60, 0.66)
1	1	30	150	-0.5	Loose Linkage	BayesC	0.52 (0.49, 0.56)	0.97 (0.97, 0.97)	0.62 (0.60, 0.65)	0.98 (0.97, 0.98)	0.79 (0.76, 0.81)
1	1	30	150	-0.5	Loose Linkage	RRBLUP	0.50 (0.47, 0.53)	1.00 (0.99, 1.00)	0.62 (0.59, 0.64)	1.00 (1.00, 1.00)	0.78 (0.75, 0.80)
1	1	30	150	-0.5	Tight Linkage	BayesC	0.59 (0.56, 0.63)	0.97 (0.96, 0.97)	0.62 (0.59, 0.65)	0.97 (0.97, 0.98)	0.85 (0.83, 0.87)
1	1	30	150	-0.5	Tight Linkage	RRBLUP	0.58 (0.55, 0.62)	1.00 (1.00, 1.00)	0.63 (0.60, 0.66)	1.00 (1.00, 1.00)	0.81 (0.78, 0.83)
1	1	30	150	-0.5	Pleiotropy	BayesC	0.54 (0.51, 0.57)	0.97 (0.97, 0.97)	0.65 (0.62, 0.68)	0.97 (0.96, 0.98)	0.66 (0.63, 0.69)
1	1	30	150	-0.5	Pleiotropy	RRBLUP	0.51 (0.48, 0.54)	1.00 (1.00, 1.00)	0.63 (0.60, 0.65)	1.00 (1.00, 1.00)	0.64 (0.61, 0.67)
1	1	30	150	0	Loose Linkage	BayesC	0.54 (0.50, 0.57)	0.97 (0.97, 0.97)	0.65 (0.63, 0.68)	0.97 (0.97, 0.98)	0.82 (0.80, 0.84)
1	1	30	150	0	Loose Linkage	RRBLUP	0.55 (0.52, 0.58)	1.00 (0.99, 1.00)	0.66 (0.63, 0.68)	1.00 (1.00, 1.00)	0.79 (0.77, 0.81)
1	1	30	150	0	Tight Linkage	BayesC	0.60 (0.57, 0.63)	0.97 (0.96, 0.97)	0.64 (0.61, 0.68)	0.97 (0.96, 0.97)	0.84 (0.82, 0.87)
1	1	30	150	0	Tight Linkage	RRBLUP	0.57 (0.54, 0.61)	1.00 (1.00, 1.00)	0.62 (0.59, 0.65)	1.00 (1.00, 1.00)	0.81 (0.78, 0.83)
1	1	30	150	0	Pleiotropy	BayesC	0.55 (0.52, 0.59)	0.97 (0.97, 0.97)	0.64 (0.61, 0.67)	0.97 (0.97, 0.98)	0.65 (0.62, 0.68)
1	1	30	150	0	Pleiotropy	RRBLUP	0.55 (0.52, 0.58)	1.00 (1.00, 1.00)	0.64 (0.61, 0.67)	1.00 (1.00, 1.00)	0.62 (0.59, 0.65)
1	1	30	150	0.5	Loose Linkage	BayesC	0.52 (0.49, 0.55)	0.97 (0.97, 0.97)	0.64 (0.60, 0.67)	0.97 (0.97, 0.98)	0.82 (0.80, 0.84)
1	1	30	150	0.5	Loose Linkage	RRBLUP	0.53 (0.50, 0.56)	1.00 (1.00, 1.00)	0.63 (0.60, 0.66)	1.00 (1.00, 1.00)	0.79 (0.77, 0.81)
1	1	30	150	0.5	Tight Linkage	BayesC	0.61 (0.57, 0.64)	0.97 (0.97, 0.97)	0.67 (0.64, 0.69)	0.97 (0.97, 0.98)	0.85 (0.82, 0.87)
1	1	30	150	0.5	Tight Linkage	RRBLUP	0.56 (0.53, 0.60)	1.00 (1.00, 1.00)	0.64 (0.61, 0.67)	1.00 (1.00, 1.00)	0.83 (0.81, 0.85)
1	1	30	150	0.5	Pleiotropy	BayesC	0.51 (0.48, 0.54)	0.97 (0.97, 0.97)	0.63 (0.60, 0.66)	0.97 (0.96, 0.97)	0.65 (0.62, 0.68)
1	1	30	150	0.5	Pleiotropy	RRBLUP	0.51 (0.48, 0.54)	1.00 (1.00, 1.00)	0.65 (0.63, 0.68)	1.00 (1.00, 1.00)	0.63 (0.60, 0.66)
1	1	30	300	-0.5	Loose Linkage	BayesC	0.64 (0.61, 0.67)	0.93 (0.92, 0.94)	0.78 (0.76, 0.80)	0.95 (0.94, 0.96)	0.87 (0.85, 0.89)
1	1	30	300	-0.5	Loose Linkage	RRBLUP	0.61 (0.58, 0.64)	1.00 (1.00, 1.00)	0.72 (0.69, 0.75)	1.00 (1.00, 1.00)	0.84 (0.81, 0.86)
1	1	30	300	-0.5	Tight Linkage	BayesC	0.71 (0.69, 0.74)	0.93 (0.93, 0.94)	0.79 (0.77, 0.81)	0.95 (0.95, 0.96)	0.88 (0.86, 0.89)
1	1	30	300	-0.5	Tight Linkage	RRBLUP	0.67 (0.64, 0.70)	1.00 (1.00, 1.00)	0.71 (0.69, 0.73)	1.00 (1.00, 1.00)	0.86 (0.84, 0.88)
1	1	30	300	-0.5	Pleiotropy	BayesC	0.64 (0.61, 0.67)	0.93 (0.92, 0.94)	0.79 (0.77, 0.81)	0.93 (0.92, 0.93)	0.78 (0.76, 0.81)
1	1	30	300	-0.5	Pleiotropy	RRBLUP	0.63 (0.61, 0.66)	1.00 (1.00, 1.00)	0.72 (0.69, 0.74)	1.00 (1.00, 1.00)	0.73 (0.70, 0.75)
1	1	30	300	0	Loose Linkage	BayesC	0.61 (0.58, 0.65)	0.93 (0.92, 0.94)	0.79 (0.77, 0.81)	0.95 (0.94, 0.95)	0.85 (0.84, 0.87)
1	1	30	300	0	Loose Linkage	RRBLUP	0.60 (0.57, 0.63)	1.00 (0.99, 1.00)	0.73 (0.71, 0.76)	1.00 (1.00, 1.00)	0.83 (0.81, 0.85)
1	1	30	300	0	Tight Linkage	BayesC	0.72 (0.69, 0.75)	0.93 (0.93, 0.94)	0.79 (0.77, 0.81)	0.95 (0.94, 0.95)	0.89 (0.87, 0.91)
1	1	30	300	0	Tight Linkage	RRBLUP	0.65 (0.62, 0.67)	1.00 (1.00, 1.00)	0.69 (0.67, 0.71)	1.00 (1.00, 1.00)	0.84 (0.82, 0.87)
1	1	30	300	0	Pleiotropy	BayesC	0.70 (0.68, 0.73)	0.92 (0.92, 0.93)	0.81 (0.79, 0.83)	0.93 (0.93, 0.94)	0.79 (0.77, 0.81)
1	1	30	300	0	Pleiotropy	RRBLUP	0.64 (0.61, 0.67)	1.00 (1.00, 1.00)	0.73 (0.70, 0.75)	1.00 (1.00, 1.00)	0.71 (0.68, 0.73)
1	1	30	300	0.5	Loose Linkage	BayesC	0.59 (0.56, 0.62)	0.94 (0.93, 0.94)	0.79 (0.77, 0.81)	0.95 (0.95, 0.96)	0.87 (0.85, 0.88)
1	1	30	300	0.5	Loose Linkage	RRBLUP	0.62 (0.59, 0.65)	1.00 (1.00, 1.00)	0.74 (0.72, 0.76)	1.00 (1.00, 1.00)	0.82 (0.80, 0.84)
1	1	30	300	0.5	Tight Linkage	BayesC	0.71 (0.68, 0.73)	0.93 (0.92, 0.94)	0.80 (0.78, 0.82)	0.95 (0.94, 0.96)	0.90 (0.88, 0.91)
1	1	30	300	0.5	Tight Linkage	RRBLUP	0.70 (0.67, 0.73)	1.00 (1.00, 1.00)	0.75 (0.72, 0.77)	1.00 (1.00, 1.00)	0.88 (0.86, 0.90)
1	1	30	300	0.5	Pleiotropy	BayesC	0.64 (0.62, 0.66)	0.93 (0.92, 0.94)	0.78 (0.76, 0.80)	0.93 (0.92, 0.93)	0.78 (0.75, 0.80)
1	1	30	300	0.5	Pleiotropy	RRBLUP	0.65 (0.62, 0.67)	1.00 (1.00, 1.00)	0.72 (0.70, 0.74)	1.00 (1.00, 1.00)	0.73 (0.71, 0.76)
1	1	30	450	-0.5	Loose Linkage	BayesC	0.66 (0.63, 0.69)	0.93 (0.93, 0.94)	0.80 (0.78, 0.82)	0.95 (0.95, 0.96)	0.87 (0.86, 0.89)
1	1	30	450	-0.5	Loose Linkage	RRBLUP	0.65 (0.63, 0.67)	1.00 (1.00, 1.00)	0.78 (0.76, 0.80)	1.00 (1.00, 1.00)	0.85 (0.83, 0.87)
1	1	30	450	-0.5	Tight Linkage	BayesC	0.75 (0.72, 0.77)	0.92 (0.92, 0.93)	0.81 (0.80, 0.83)	0.95 (0.95, 0.96)	0.89 (0.87, 0.91)
1	1	30	450	-0.5	Tight Linkage	RRBLUP	0.70 (0.67, 0.73)	1.00 (0.99, 1.00)	0.74 (0.72, 0.76)	1.00 (1.00, 1.00)	0.87 (0.86, 0.89)
1	1	30	450	-0.5	Pleiotropy	BayesC	0.70 (0.67, 0.72)	0.93 (0.93, 0.94)	0.81 (0.79, 0.83)	0.92 (0.92, 0.93)	0.82 (0.80, 0.84)
1	1	30	450	-0.5	Pleiotropy	RRBLUP	0.68 (0.65, 0.70)	1.00 (1.00, 1.00)	0.77 (0.75, 0.79)	1.00 (0.99, 1.00)	0.76 (0.74, 0.78)
1	1	30	450	0	Loose Linkage	BayesC	0.68 (0.66, 0.71)	0.93 (0.92, 0.93)	0.81 (0.79, 0.83)	0.96 (0.95, 0.96)	0.87 (0.85, 0.89)
1	1	30	450	0	Loose Linkage	RRBLUP	0.64 (0.61, 0.67)	1.00 (0.99, 1.00)	0.75 (0.73, 0.77)	1.00 (1.00, 1.00)	0.85 (0.83, 0.87)
1	1	30	450	0	Tight Linkage	BayesC	0.74 (0.72, 0.77)	0.93 (0.92, 0.93)	0.82 (0.80, 0.83)	0.96 (0.95, 0.96)	0.91 (0.90, 0.92)
1	1	30	450	0	Tight Linkage	RRBLUP	0.76 (0.74, 0.79)	1.00 (1.00, 1.00)	0.77 (0.75, 0.79)	1.00 (1.00, 1.00)	0.90 (0.88, 0.91)
1	1	30	450	0	Pleiotropy	BayesC	0.73 (0.71, 0.75)	0.93 (0.92, 0.93)	0.82 (0.80, 0.84)	0.93 (0.93, 0.94)	0.79 (0.77, 0.81)
1	1	30	450	0	Pleiotropy	RRBLUP	0.71 (0.69, 0.73)	1.00 (1.00, 1.00)	0.76 (0.74, 0.78)	1.00 (1.00, 1.00)	0.77 (0.75, 0.79)
1	1	30	450	0.5	Loose Linkage	BayesC	0.70 (0.67, 0.73)	0.93 (0.92, 0.94)	0.82 (0.81, 0.84)	0.96 (0.95, 0.96)	0.87 (0.85, 0.88)
1	1	30	450	0.5	Loose Linkage	RRBLUP	0.66 (0.63, 0.69)	1.00 (1.00, 1.00)	0.77 (0.76, 0.79)	1.00 (1.00, 1.00)	0.86 (0.85, 0.88)
1	1	30	450	0.5	Tight Linkage	BayesC	0.76 (0.74, 0.78)	0.93 (0.93, 0.94)	0.83 (0.81, 0.84)	0.95 (0.95, 0.96)	0.91 (0.89, 0.92)
1	1	30	450	0.5	Tight Linkage	RRBLUP	0.74 (0.72, 0.77)	1.00 (1.00, 1.00)	0.76 (0.74, 0.79)	1.00 (1.00, 1.00)	0.88 (0.86, 0.89)
1	1	30	450	0.5	Pleiotropy	BayesC	0.69 (0.67, 0.72)	0.93 (0.92, 0.93)	0.83 (0.81, 0.84)	0.92 (0.92, 0.93)	0.81 (0.79, 0.83)
1	1	30	450	0.5	Pleiotropy	RRBLUP	0.69 (0.67, 0.71)	1.00 (1.00, 1.00)	0.79 (0.77, 0.81)	1.00 (0.99, 1.00)	0.78 (0.76, 0.80)
1	1	30	600	-0.5	Loose Linkage	BayesC	0.69 (0.66, 0.72)	0.93 (0.93, 0.94)	0.83 (0.81, 0.85)	0.96 (0.95, 0.96)	0.88 (0.86, 0.89)
1	1	30	600	-0.5	Loose Linkage	RRBLUP	0.70 (0.67, 0.72)	1.00 (0.99, 1.00)	0.79 (0.77, 0.80)	1.00 (1.00, 1.00)	0.87 (0.85, 0.89)
1	1	30	600	-0.5	Tight Linkage	BayesC	0.77 (0.75, 0.78)	0.93 (0.92, 0.94)	0.81 (0.79, 0.83)	0.96 (0.96, 0.97)	0.91 (0.90, 0.92)
1	1	30	600	-0.5	Tight Linkage	RRBLUP	0.73 (0.71, 0.75)	0.99 (0.99, 1.00)	0.78 (0.76, 0.80)	1.00 (1.00, 1.00)	0.89 (0.88, 0.91)
1	1	30	600	-0.5	Pleiotropy	BayesC	0.72 (0.70, 0.75)	0.93 (0.93, 0.94)	0.83 (0.81, 0.85)	0.93 (0.92, 0.93)	0.83 (0.82, 0.85)
1	1	30	600	-0.5	Pleiotropy	RRBLUP	0.70 (0.67, 0.73)	0.99 (0.99, 1.00)	0.79 (0.77, 0.80)	0.99 (0.99, 1.00)	0.78 (0.76, 0.80)
1	1	30	600	0	Loose Linkage	BayesC	0.72 (0.69, 0.74)	0.94 (0.93, 0.94)	0.84 (0.83, 0.86)	0.96 (0.96, 0.97)	0.89 (0.88, 0.91)
1	1	30	600	0	Loose Linkage	RRBLUP	0.71 (0.68, 0.73)	1.00 (0.99, 1.00)	0.81 (0.80, 0.83)	1.00 (1.00, 1.00)	0.88 (0.87, 0.90)
1	1	30	600	0	Tight Linkage	BayesC	0.77 (0.75, 0.79)	0.93 (0.93, 0.94)	0.82 (0.81, 0.84)	0.96 (0.96, 0.97)	0.91 (0.90, 0.92)
1	1	30	600	0	Tight Linkage	RRBLUP	0.76 (0.74, 0.78)	0.99 (0.99, 1.00)	0.79 (0.77, 0.81)	1.00 (1.00, 1.00)	0.90 (0.89, 0.92)
1	1	30	600	0	Pleiotropy	BayesC	0.78 (0.76, 0.80)	0.93 (0.93, 0.94)	0.83 (0.82, 0.85)	0.93 (0.93, 0.94)	0.83 (0.81, 0.85)
1	1	30	600	0	Pleiotropy	RRBLUP	0.73 (0.71, 0.75)	0.99 (0.99, 1.00)	0.81 (0.79, 0.82)	0.99 (0.99, 1.00)	0.80 (0.79, 0.82)
1	1	30	600	0.5	Loose Linkage	BayesC	0.69 (0.66, 0.71)	0.93 (0.92, 0.93)	0.82 (0.80, 0.83)	0.96 (0.95, 0.96)	0.89 (0.88, 0.90)
1	1	30	600	0.5	Loose Linkage	RRBLUP	0.68 (0.66, 0.71)	0.99 (0.99, 1.00)	0.78 (0.76, 0.80)	1.00 (1.00, 1.00)	0.87 (0.85, 0.88)
1	1	30	600	0.5	Tight Linkage	BayesC	0.76 (0.74, 0.78)	0.93 (0.93, 0.94)	0.83 (0.81, 0.85)	0.96 (0.95, 0.96)	0.91 (0.90, 0.92)
1	1	30	600	0.5	Tight Linkage	RRBLUP	0.76 (0.74, 0.78)	0.99 (0.99, 1.00)	0.79 (0.78, 0.81)	1.00 (1.00, 1.00)	0.90 (0.89, 0.92)
1	1	30	600	0.5	Pleiotropy	BayesC	0.71 (0.68, 0.73)	0.94 (0.93, 0.94)	0.82 (0.81, 0.84)	0.93 (0.92, 0.94)	0.82 (0.81, 0.84)
1	1	30	600	0.5	Pleiotropy	RRBLUP	0.71 (0.69, 0.74)	1.00 (0.99, 1.00)	0.80 (0.78, 0.82)	0.99 (0.99, 1.00)	0.80 (0.78, 0.82)
1	1	100	150	-0.5	Loose Linkage	BayesC	0.58 (0.55, 0.61)	0.97 (0.97, 0.98)	0.61 (0.58, 0.63)	0.99 (0.99, 0.99)	0.86 (0.85, 0.88)
1	1	100	150	-0.5	Loose Linkage	RRBLUP	0.58 (0.56, 0.61)	1.00 (0.99, 1.00)	0.62 (0.59, 0.64)	1.00 (1.00, 1.00)	0.87 (0.86, 0.89)
1	1	100	150	-0.5	Tight Linkage	BayesC	0.63 (0.61, 0.66)	0.97 (0.97, 0.98)	0.61 (0.57, 0.64)	0.99 (0.99, 0.99)	0.89 (0.87, 0.91)
1	1	100	150	-0.5	Tight Linkage	RRBLUP	0.64 (0.61, 0.67)	1.00 (1.00, 1.00)	0.61 (0.58, 0.64)	1.00 (1.00, 1.00)	0.91 (0.90, 0.93)
1	1	100	150	-0.5	Pleiotropy	BayesC	0.46 (0.43, 0.49)	0.98 (0.97, 0.98)	0.62 (0.59, 0.65)	0.98 (0.97, 0.98)	0.62 (0.59, 0.65)
1	1	100	150	-0.5	Pleiotropy	RRBLUP	0.49 (0.45, 0.52)	1.00 (1.00, 1.00)	0.64 (0.61, 0.67)	1.00 (1.00, 1.00)	0.63 (0.60, 0.65)
1	1	100	150	0	Loose Linkage	BayesC	0.61 (0.59, 0.64)	0.98 (0.97, 0.98)	0.61 (0.59, 0.64)	0.99 (0.99, 0.99)	0.85 (0.83, 0.87)
1	1	100	150	0	Loose Linkage	RRBLUP	0.60 (0.57, 0.62)	1.00 (1.00, 1.00)	0.62 (0.59, 0.64)	1.00 (1.00, 1.00)	0.86 (0.84, 0.88)
1	1	100	150	0	Tight Linkage	BayesC	0.63 (0.60, 0.66)	0.98 (0.97, 0.98)	0.60 (0.57, 0.63)	0.99 (0.99, 0.99)	0.90 (0.89, 0.92)
1	1	100	150	0	Tight Linkage	RRBLUP	0.63 (0.60, 0.65)	1.00 (1.00, 1.00)	0.61 (0.58, 0.63)	1.00 (1.00, 1.00)	0.90 (0.89, 0.91)
1	1	100	150	0	Pleiotropy	BayesC	0.47 (0.44, 0.50)	0.98 (0.98, 0.98)	0.61 (0.58, 0.63)	0.97 (0.97, 0.98)	0.63 (0.61, 0.65)
1	1	100	150	0	Pleiotropy	RRBLUP	0.48 (0.45, 0.51)	1.00 (1.00, 1.00)	0.61 (0.58, 0.64)	1.00 (1.00, 1.00)	0.62 (0.59, 0.65)
1	1	100	150	0.5	Loose Linkage	BayesC	0.60 (0.58, 0.63)	0.97 (0.97, 0.98)	0.63 (0.61, 0.66)	0.99 (0.99, 0.99)	0.87 (0.85, 0.88)
1	1	100	150	0.5	Loose Linkage	RRBLUP	0.60 (0.57, 0.62)	1.00 (1.00, 1.00)	0.61 (0.58, 0.63)	1.00 (1.00, 1.00)	0.87 (0.85, 0.89)
1	1	100	150	0.5	Tight Linkage	BayesC	0.62 (0.59, 0.65)	0.97 (0.97, 0.98)	0.61 (0.58, 0.65)	0.99 (0.99, 0.99)	0.90 (0.88, 0.91)
1	1	100	150	0.5	Tight Linkage	RRBLUP	0.63 (0.61, 0.66)	1.00 (1.00, 1.00)	0.59 (0.56, 0.61)	1.00 (1.00, 1.00)	0.90 (0.88, 0.91)
1	1	100	150	0.5	Pleiotropy	BayesC	0.46 (0.43, 0.50)	0.97 (0.97, 0.98)	0.59 (0.57, 0.62)	0.98 (0.97, 0.98)	0.62 (0.60, 0.65)
1	1	100	150	0.5	Pleiotropy	RRBLUP	0.49 (0.46, 0.51)	1.00 (1.00, 1.00)	0.60 (0.57, 0.62)	1.00 (1.00, 1.00)	0.65 (0.62, 0.68)
1	1	100	300	-0.5	Loose Linkage	BayesC	0.70 (0.68, 0.72)	0.98 (0.98, 0.98)	0.72 (0.70, 0.74)	0.99 (0.99, 0.99)	0.91 (0.90, 0.92)
1	1	100	300	-0.5	Loose Linkage	RRBLUP	0.65 (0.63, 0.67)	1.00 (1.00, 1.00)	0.70 (0.68, 0.72)	1.00 (1.00, 1.00)	0.90 (0.89, 0.92)
1	1	100	300	-0.5	Tight Linkage	BayesC	0.72 (0.70, 0.75)	0.97 (0.97, 0.98)	0.72 (0.69, 0.74)	0.98 (0.98, 0.99)	0.94 (0.93, 0.94)
1	1	100	300	-0.5	Tight Linkage	RRBLUP	0.74 (0.72, 0.76)	1.00 (1.00, 1.00)	0.71 (0.68, 0.73)	1.00 (1.00, 1.00)	0.93 (0.92, 0.94)
1	1	100	300	-0.5	Pleiotropy	BayesC	0.60 (0.58, 0.63)	0.98 (0.97, 0.98)	0.74 (0.72, 0.76)	0.98 (0.97, 0.98)	0.73 (0.70, 0.75)
1	1	100	300	-0.5	Pleiotropy	RRBLUP	0.59 (0.56, 0.62)	1.00 (1.00, 1.00)	0.71 (0.69, 0.73)	1.00 (1.00, 1.00)	0.73 (0.71, 0.75)
1	1	100	300	0	Loose Linkage	BayesC	0.68 (0.66, 0.70)	0.98 (0.97, 0.98)	0.73 (0.71, 0.75)	0.99 (0.99, 0.99)	0.92 (0.90, 0.93)
1	1	100	300	0	Loose Linkage	RRBLUP	0.69 (0.67, 0.71)	1.00 (1.00, 1.00)	0.70 (0.68, 0.73)	1.00 (1.00, 1.00)	0.91 (0.89, 0.92)
1	1	100	300	0	Tight Linkage	BayesC	0.72 (0.70, 0.74)	0.98 (0.97, 0.98)	0.71 (0.69, 0.73)	0.99 (0.99, 0.99)	0.94 (0.93, 0.95)
1	1	100	300	0	Tight Linkage	RRBLUP	0.72 (0.70, 0.74)	1.00 (1.00, 1.00)	0.70 (0.68, 0.72)	1.00 (1.00, 1.00)	0.94 (0.93, 0.95)
1	1	100	300	0	Pleiotropy	BayesC	0.62 (0.60, 0.65)	0.98 (0.97, 0.98)	0.72 (0.70, 0.74)	0.98 (0.97, 0.98)	0.72 (0.70, 0.75)
1	1	100	300	0	Pleiotropy	RRBLUP	0.63 (0.61, 0.65)	1.00 (1.00, 1.00)	0.72 (0.70, 0.74)	1.00 (1.00, 1.00)	0.74 (0.72, 0.75)
1	1	100	300	0.5	Loose Linkage	BayesC	0.71 (0.69, 0.73)	0.98 (0.98, 0.98)	0.73 (0.70, 0.76)	0.99 (0.99, 0.99)	0.91 (0.90, 0.92)
1	1	100	300	0.5	Loose Linkage	RRBLUP	0.67 (0.65, 0.69)	1.00 (1.00, 1.00)	0.71 (0.69, 0.73)	1.00 (1.00, 1.00)	0.91 (0.90, 0.92)
1	1	100	300	0.5	Tight Linkage	BayesC	0.71 (0.69, 0.73)	0.97 (0.97, 0.98)	0.74 (0.72, 0.76)	0.99 (0.98, 0.99)	0.93 (0.91, 0.94)
1	1	100	300	0.5	Tight Linkage	RRBLUP	0.73 (0.71, 0.75)	1.00 (1.00, 1.00)	0.71 (0.69, 0.74)	1.00 (1.00, 1.00)	0.92 (0.91, 0.94)
1	1	100	300	0.5	Pleiotropy	BayesC	0.61 (0.58, 0.64)	0.97 (0.97, 0.98)	0.73 (0.70, 0.75)	0.97 (0.97, 0.98)	0.74 (0.72, 0.76)
1	1	100	300	0.5	Pleiotropy	RRBLUP	0.61 (0.59, 0.64)	1.00 (1.00, 1.00)	0.71 (0.69, 0.73)	1.00 (1.00, 1.00)	0.71 (0.69, 0.73)
1	1	100	450	-0.5	Loose Linkage	BayesC	0.73 (0.71, 0.75)	0.97 (0.96, 0.97)	0.79 (0.77, 0.81)	0.99 (0.99, 0.99)	0.93 (0.92, 0.94)
1	1	100	450	-0.5	Loose Linkage	RRBLUP	0.71 (0.69, 0.73)	1.00 (1.00, 1.00)	0.75 (0.74, 0.77)	1.00 (1.00, 1.00)	0.91 (0.90, 0.92)
1	1	100	450	-0.5	Tight Linkage	BayesC	0.77 (0.75, 0.79)	0.97 (0.97, 0.97)	0.78 (0.76, 0.79)	0.99 (0.99, 0.99)	0.95 (0.94, 0.95)
1	1	100	450	-0.5	Tight Linkage	RRBLUP	0.77 (0.75, 0.79)	1.00 (1.00, 1.00)	0.75 (0.74, 0.77)	1.00 (1.00, 1.00)	0.95 (0.94, 0.96)
1	1	100	450	-0.5	Pleiotropy	BayesC	0.67 (0.65, 0.70)	0.97 (0.97, 0.97)	0.79 (0.77, 0.80)	0.97 (0.96, 0.97)	0.80 (0.79, 0.82)
1	1	100	450	-0.5	Pleiotropy	RRBLUP	0.67 (0.65, 0.69)	1.00 (1.00, 1.00)	0.77 (0.76, 0.79)	1.00 (1.00, 1.00)	0.76 (0.75, 0.78)
1	1	100	450	0	Loose Linkage	BayesC	0.72 (0.70, 0.74)	0.97 (0.97, 0.97)	0.78 (0.77, 0.80)	0.99 (0.98, 0.99)	0.92 (0.91, 0.93)
1	1	100	450	0	Loose Linkage	RRBLUP	0.73 (0.71, 0.75)	1.00 (1.00, 1.00)	0.76 (0.74, 0.77)	1.00 (1.00, 1.00)	0.91 (0.89, 0.92)
1	1	100	450	0	Tight Linkage	BayesC	0.78 (0.76, 0.80)	0.97 (0.96, 0.97)	0.77 (0.75, 0.79)	0.99 (0.99, 0.99)	0.95 (0.94, 0.95)
1	1	100	450	0	Tight Linkage	RRBLUP	0.76 (0.75, 0.78)	1.00 (1.00, 1.00)	0.75 (0.73, 0.77)	1.00 (1.00, 1.00)	0.94 (0.93, 0.95)
1	1	100	450	0	Pleiotropy	BayesC	0.71 (0.69, 0.74)	0.97 (0.97, 0.97)	0.78 (0.76, 0.80)	0.97 (0.96, 0.97)	0.78 (0.77, 0.80)
1	1	100	450	0	Pleiotropy	RRBLUP	0.69 (0.67, 0.71)	1.00 (1.00, 1.00)	0.79 (0.78, 0.81)	1.00 (1.00, 1.00)	0.77 (0.75, 0.79)
1	1	100	450	0.5	Loose Linkage	BayesC	0.73 (0.71, 0.75)	0.97 (0.96, 0.97)	0.78 (0.76, 0.79)	0.99 (0.98, 0.99)	0.92 (0.91, 0.93)
1	1	100	450	0.5	Loose Linkage	RRBLUP	0.73 (0.71, 0.75)	1.00 (1.00, 1.00)	0.75 (0.73, 0.77)	1.00 (1.00, 1.00)	0.92 (0.91, 0.93)
1	1	100	450	0.5	Tight Linkage	BayesC	0.78 (0.76, 0.80)	0.97 (0.97, 0.97)	0.78 (0.76, 0.80)	0.99 (0.99, 0.99)	0.95 (0.94, 0.96)
1	1	100	450	0.5	Tight Linkage	RRBLUP	0.77 (0.75, 0.79)	1.00 (1.00, 1.00)	0.74 (0.72, 0.76)	1.00 (1.00, 1.00)	0.95 (0.95, 0.96)
1	1	100	450	0.5	Pleiotropy	BayesC	0.65 (0.62, 0.67)	0.97 (0.97, 0.97)	0.78 (0.76, 0.80)	0.97 (0.96, 0.97)	0.78 (0.76, 0.80)
1	1	100	450	0.5	Pleiotropy	RRBLUP	0.65 (0.62, 0.67)	1.00 (1.00, 1.00)	0.78 (0.76, 0.79)	1.00 (1.00, 1.00)	0.77 (0.75, 0.78)
1	1	100	600	-0.5	Loose Linkage	BayesC	0.78 (0.76, 0.79)	0.97 (0.97, 0.97)	0.83 (0.81, 0.84)	0.99 (0.99, 0.99)	0.93 (0.92, 0.94)
1	1	100	600	-0.5	Loose Linkage	RRBLUP	0.74 (0.73, 0.76)	0.99 (0.99, 1.00)	0.79 (0.78, 0.81)	1.00 (1.00, 1.00)	0.92 (0.92, 0.93)
1	1	100	600	-0.5	Tight Linkage	BayesC	0.80 (0.79, 0.82)	0.97 (0.96, 0.97)	0.81 (0.79, 0.82)	0.99 (0.99, 0.99)	0.95 (0.95, 0.96)
1	1	100	600	-0.5	Tight Linkage	RRBLUP	0.79 (0.78, 0.81)	0.99 (0.99, 1.00)	0.79 (0.77, 0.81)	1.00 (1.00, 1.00)	0.95 (0.94, 0.96)
1	1	100	600	-0.5	Pleiotropy	BayesC	0.69 (0.67, 0.71)	0.97 (0.97, 0.97)	0.81 (0.80, 0.83)	0.97 (0.96, 0.97)	0.81 (0.79, 0.82)
1	1	100	600	-0.5	Pleiotropy	RRBLUP	0.72 (0.70, 0.74)	1.00 (0.99, 1.00)	0.80 (0.78, 0.81)	1.00 (1.00, 1.00)	0.80 (0.78, 0.82)
1	1	100	600	0	Loose Linkage	BayesC	0.76 (0.74, 0.78)	0.97 (0.97, 0.97)	0.82 (0.81, 0.84)	0.99 (0.99, 0.99)	0.93 (0.92, 0.94)
1	1	100	600	0	Loose Linkage	RRBLUP	0.75 (0.74, 0.77)	1.00 (0.99, 1.00)	0.79 (0.77, 0.81)	1.00 (1.00, 1.00)	0.92 (0.91, 0.94)
1	1	100	600	0	Tight Linkage	BayesC	0.80 (0.79, 0.82)	0.97 (0.96, 0.97)	0.80 (0.79, 0.82)	0.99 (0.99, 0.99)	0.95 (0.94, 0.96)
1	1	100	600	0	Tight Linkage	RRBLUP	0.81 (0.79, 0.82)	0.99 (0.99, 1.00)	0.78 (0.76, 0.80)	1.00 (1.00, 1.00)	0.95 (0.94, 0.96)
1	1	100	600	0	Pleiotropy	BayesC	0.72 (0.70, 0.74)	0.97 (0.96, 0.97)	0.80 (0.78, 0.82)	0.97 (0.97, 0.97)	0.80 (0.79, 0.82)
1	1	100	600	0	Pleiotropy	RRBLUP	0.71 (0.69, 0.73)	1.00 (0.99, 1.00)	0.79 (0.77, 0.80)	1.00 (0.99, 1.00)	0.77 (0.76, 0.79)
1	1	100	600	0.5	Loose Linkage	BayesC	0.77 (0.75, 0.79)	0.97 (0.97, 0.97)	0.80 (0.78, 0.82)	0.99 (0.99, 0.99)	0.93 (0.92, 0.94)
1	1	100	600	0.5	Loose Linkage	RRBLUP	0.74 (0.72, 0.76)	1.00 (0.99, 1.00)	0.78 (0.77, 0.80)	1.00 (1.00, 1.00)	0.93 (0.92, 0.94)
1	1	100	600	0.5	Tight Linkage	BayesC	0.78 (0.77, 0.80)	0.97 (0.97, 0.97)	0.81 (0.80, 0.83)	0.99 (0.99, 0.99)	0.95 (0.94, 0.96)
1	1	100	600	0.5	Tight Linkage	RRBLUP	0.80 (0.79, 0.82)	0.99 (0.99, 1.00)	0.77 (0.76, 0.79)	1.00 (1.00, 1.00)	0.95 (0.95, 0.96)
1	1	100	600	0.5	Pleiotropy	BayesC	0.71 (0.69, 0.73)	0.97 (0.96, 0.97)	0.80 (0.78, 0.82)	0.96 (0.96, 0.97)	0.81 (0.80, 0.83)
1	1	100	600	0.5	Pleiotropy	RRBLUP	0.69 (0.67, 0.71)	0.99 (0.99, 1.00)	0.80 (0.78, 0.82)	1.00 (0.99, 1.00)	0.80 (0.78, 0.81)
